# Supplementary material for: Previously undetected super-spreading of Mycobacterium tuberculosis revealed by deep sequencing
Source: eLife. 2020 Feb 4;9:e53245. doi: 10.7554/eLife.53245 (PMC7012596; doi:10.7554/eLife.53245)
Supplement: Source data 3. [file elife-53245-data3.xlsx]

## Sheet: shared_hSNP_positions
Supplementary File 3: Positons with shared hSNPs in all 62 samples versus H37Rv
	Type_of_variant	Gene_names	Gene_codes	Protein	Upstream_gene_stop	Downstream_gene_start	Upstream_protein	Downstream_protein	Distance_nearest_gene
336535	Intergenic	PE_PGRS3-PE_PGRS4	Rv0278c-Rv0279c		336310	336560	PE-PGRS family protein PE_PGRS3	PE-PGRS family protein PE_PGRS4	25
336537	Intergenic	PE_PGRS3-PE_PGRS4	Rv0278c-Rv0279c		336310	336560	PE-PGRS family protein PE_PGRS3	PE-PGRS family protein PE_PGRS4	23
336540	Intergenic	PE_PGRS3-PE_PGRS4	Rv0278c-Rv0279c		336310	336560	PE-PGRS family protein PE_PGRS3	PE-PGRS family protein PE_PGRS4	20
336546	Intergenic	PE_PGRS3-PE_PGRS4	Rv0278c-Rv0279c		336310	336560	PE-PGRS family protein PE_PGRS3	PE-PGRS family protein PE_PGRS4	14
2260171	Intergenic	Rv2012-Rv2013	Rv2012-Rv2013		2259820	2260665	Conserved hypothetical protein	Transposase	351
2260174	Intergenic	Rv2012-Rv2013	Rv2012-Rv2013		2259820	2260665	Conserved hypothetical protein	Transposase	354
2260199	Intergenic	Rv2012-Rv2013	Rv2012-Rv2013		2259820	2260665	Conserved hypothetical protein	Transposase	379
2260212	Intergenic	Rv2012-Rv2013	Rv2012-Rv2013		2259820	2260665	Conserved hypothetical protein	Transposase	392
2260214	Intergenic	Rv2012-Rv2013	Rv2012-Rv2013		2259820	2260665	Conserved hypothetical protein	Transposase	394
2260220	Intergenic	Rv2012-Rv2013	Rv2012-Rv2013		2259820	2260665	Conserved hypothetical protein	Transposase	400
2260222	Intergenic	Rv2012-Rv2013	Rv2012-Rv2013		2259820	2260665	Conserved hypothetical protein	Transposase	402
2260231	Intergenic	Rv2012-Rv2013	Rv2012-Rv2013		2259820	2260665	Conserved hypothetical protein	Transposase	411
2266508	missense_variant	Rv2020c		Conserved hypothetical protein
2266517	synonymous_variant	Rv2020c		Conserved hypothetical protein
2266550	synonymous_variant	Rv2020c		Conserved hypothetical protein
2266553	synonymous_variant	Rv2020c		Conserved hypothetical protein
2266583	missense_variant	Rv2020c		Conserved hypothetical protein
2266598	synonymous_variant	Rv2020c		Conserved hypothetical protein
2266604	synonymous_variant	Rv2020c		Conserved hypothetical protein
2266624	missense_variant	Rv2020c		Conserved hypothetical protein
2866551	synonymous_variant	lppA	Rv2543	Probable conserved lipoprotein A
2866569	synonymous_variant	lppA	Rv2543	Probable conserved lipoprotein A
2866578	missense_variant	lppA	Rv2543	Probable conserved lipoprotein A
2866580	missense_variant	lppA	Rv2543	Probable conserved lipoprotein A
2866607	missense_variant	lppA	Rv2543	Probable conserved lipoprotein A
2866657	missense_variant	lppA	Rv2543	Probable conserved lipoprotein A
2866671	synonymous_variant	lppA	Rv2543	Probable conserved lipoprotein A
2866677	synonymous_variant	lppA	Rv2543	Probable conserved lipoprotein A
2866876	missense_variant	lppA	Rv2543	Probable conserved lipoprotein A
2866880	missense_variant	lppA	Rv2543	Probable conserved lipoprotein A
2866882	missense_variant	lppA	Rv2543	Probable conserved lipoprotein A
2867207	synonymous_variant	lppB	Rv2544	Probable conserved lipoprotein A
2867298	missense_variant	lppB	Rv2544	Probable conserved lipoprotein A
2867347	missense_variant	lppB	Rv2544	Probable conserved lipoprotein A
3820545	Intergenic	Rv3401-Rv3402c			3820402	3820653	Conserved protein	Conserved protein	108
3843749	Intergenic	PPE58-Rv3427c	Rv3426-Rv3427c		3843734	3843885	PPE family protein PPE58	Possible transposase	15
3843751	Intergenic	PPE58-Rv3427c	Rv3426-Rv3427c		3843734	3843885	PPE family protein PPE58	Possible transposase	17
3843752	Intergenic	PPE58-Rv3427c	Rv3426-Rv3427c		3843734	3843885	PPE family protein PPE58	Possible transposase	18
3843753	Intergenic	PPE58-Rv3427c	Rv3426-Rv3427c		3843734	3843885	PPE family protein PPE58	Possible transposase	19
3843760	Intergenic	PPE58-Rv3427c	Rv3426-Rv3427c		3843734	3843885	PPE family protein PPE58	Possible transposase	26
3846687	Intergenic	Rv3428c-PPE59	Rv3428c-Rv3429		3845970	3847165	Possible transposase	PPE family protein PPE59	478
4120983	Intergenic	Rv3680-whiB4	Rv3680-Rv3681c		4120955	4121198	Probable anion transporter ATPase	Probable transcriptional regulatory protein WhiB-like WhiB4	28
