# Supplementary material for: Previously undetected super-spreading of Mycobacterium tuberculosis revealed by deep sequencing
Source: eLife. 2020 Feb 4;9:e53245. doi: 10.7554/eLife.53245 (PMC7012596; doi:10.7554/eLife.53245)
Supplement: Source data 4. [file elife-53245-data4.xlsx]

## Sheet: Phred50_FS60_RMSMQ30RP-8_0.95
Supplementary File 4: Quality of shared hSNPs in all 62 samples versus H37Rv
Position_in_RV	Chromsome	Reference_allele	Alternative_allele	Phred	Depth_at_position	RMS_MQ	ReadPos_Bias	Fisher_Strand_Bias	Reference_allele_count	Alternative_allele_count	Sum_reference_alt_alleles	hSNP	Sample_name	Average_depth_for_sample	ratio
2260171	NC_000962.3	T	C	2609.77	529	57.21	-2.172	0.696	418	110	528	Y	MT-3271	654.699	0.808005
2260171	NC_000962.3	T	C	2533.77	442	56.98	-1.316	0.679	341	99	440	Y	MT-6084	570.377	0.774926
2260171	NC_000962.3	T	C	1720.77	586	57.86	-1.522	1.724	490	95	585	Y	MT-5543	723.238	0.810245
2260171	NC_000962.3	T	C	2038.77	565	56.77	-1.967	15.93	464	100	564	Y	MT-3683	804.958	0.7019
2260171	NC_000962.3	T	C	2795.77	559	57.2	-2.578	0	443	116	559	Y	MT-1103	724.505	0.771561
2260171	NC_000962.3	T	C	3066.77	570	56.24	-2.927	10.832	444	124	568	Y	MT-5488	745.909	0.764168
2260171	NC_000962.3	T	C	3050.77	603	57	-1.068	1.52	476	126	602	Y	MT-2762	689.696	0.874298
2260171	NC_000962.3	T	C	2096.77	624	57.39	-2.565	11.754	517	104	621	Y	MT-4854	791.843	0.788035
2260171	NC_000962.3	T	C	2641.77	565	57.34	-2.833	4.59	452	110	562	Y	MT-2175	708.086	0.797926
2260171	NC_000962.3	T	C	4147.77	815	56.66	-2.12	9.748	642	172	814	Y	MT-2151	952.498	0.855645
2260171	NC_000962.3	T	C	2301.77	628	57.18	-2.955	8.355	516	110	626	Y	73787	778.122	0.807071
2260171	NC_000962.3	T	C	1178.77	354	57.85	-1.108	0	295	59	354	Y	MT-2665	424.731	0.833469
2260171	NC_000962.3	T	C	2762.77	587	57.06	-1.466	6.219	468	116	584	Y	MT-1466	761.306	0.771043
2260171	NC_000962.3	T	C	1928.77	674	57.14	-2.631	20.428	570	103	673	Y	MT-467	829.937	0.81211
2260171	NC_000962.3	T	C	2342.77	667	56.91	-2.459	18.865	552	114	666	Y	MT-1838	809.501	0.823964
2260171	NC_000962.3	T	C	3012.77	596	57.61	-1.066	1.486	466	130	596	Y	MT-1684	680.222	0.876185
2260171	NC_000962.3	T	C	3661.77	616	56.61	-1.663	5.704	471	145	616	Y	MT-1206	707.427	0.870761
2260171	NC_000962.3	T	C	2465.77	518	57.05	-2.774	1.524	413	103	516	Y	MT-2174	619.613	0.836006
2260171	NC_000962.3	T	C	1949.77	587	57.07	-1.064	21.289	487	98	585	Y	MT-567	777.127	0.755346
2260171	NC_000962.3	T	C	2190.77	491	56.41	-2.083	22.053	394	96	490	Y	MT-5531	691.535	0.710015
2260171	NC_000962.3	T	C	2677.77	639	56.71	-2.815	23.089	519	118	637	Y	MT-2771	821.752	0.777607
2260171	NC_000962.3	T	C	2551.77	477	56.69	-3.547	8.943	370	105	475	Y	MT-389	674.259	0.707443
2260171	NC_000962.3	T	C	3233.06	714	57.41	-2.691	1.527	570	143	713	Y	MT-0718	814.878	0.876205
2260171	NC_000962.3	T	C	2298.77	570	56.44	-2.762	20.828	459	108	567	Y	74856	795.746	0.716309
2260171	NC_000962.3	T	C	2304.77	619	56.75	-2.533	23.343	506	111	617	Y	MT-5983	804.62	0.769307
2260171	NC_000962.3	T	C	2694.77	694	56.73	-2.089	24.608	567	125	692	Y	MT-0712	929.442	0.746685
2260171	NC_000962.3	T	C	2155.77	513	56.43	-1.433	18.715	415	97	512	Y	MT-2800	672.144	0.763229
2260171	NC_000962.3	T	C	1417.77	422	57.02	-1.282	14.045	347	72	419	Y	MT-6218	589.217	0.716205
2260171	NC_000962.3	T	C	2157.77	591	56.68	-3.049	23.26	486	104	590	Y	MT-5383	810.086	0.729552
2260171	NC_000962.3	T	C	2546.77	605	56.6	-2.574	13.757	488	117	605	Y	MT-0972	783.34	0.772334
2260171	NC_000962.3	T	C	2598.77	511	57.2	-2.495	0.7	402	109	511	Y	MT-2474	619.076	0.825424
2260171	NC_000962.3	T	C	2697.77	548	57.26	-2.586	5.786	434	112	546	Y	MT-2184	678.348	0.807845
2260171	NC_000962.3	T	C	2694.77	573	57.3	-2.385	0.718	458	114	572	Y	MT-1605	704.559	0.813275
2260171	NC_000962.3	T	C	3287.77	595	56.87	-3.822	0	453	136	589	Y	MT-1393	744.375	0.799328
2260171	NC_000962.3	T	C	2933.77	586	56.79	-1.633	5.957	460	123	583	Y	MT-4942	684.058	0.856653
2260171	NC_000962.3	T	C	2293.77	478	57.35	0.312	1.522	376	100	476	Y	MT-1336	596.214	0.801726
2260171	NC_000962.3	T	C	3032.77	645	57.37	-3.998	0.717	515	130	645	Y	MT-5195	800.645	0.8056
2260171	NC_000962.3	T	C	1680.77	416	56.62	-2.208	24.418	339	77	416	Y	MT-6226	594.349	0.699925
2260171	NC_000962.3	T	C	2380.77	418	55.98	-1.779	34.734	321	96	417	Y	MT-3173	585.845	0.713499
2260171	NC_000962.3	T	C	2868.77	616	57.08	-1.173	7.56	491	122	613	Y	MT-1212	748.265	0.823238
2260171	NC_000962.3	T	C	2970.77	638	56.13	-2.549	27.464	506	132	638	Y	MT-0080	858.628	0.743046
2260171	NC_000962.3	T	C	2600.77	516	56.29	-3.816	9.287	403	112	515	Y	MT-3673	674.031	0.765543
2260171	NC_000962.3	T	C	2122.77	519	57.62	-2.173	0.72	418	101	519	Y	MT-2356	630.417	0.823265
2260171	NC_000962.3	T	C	2504.77	514	56.82	-1.917	6.193	409	105	514	Y	78932	638.347	0.805205
2260171	NC_000962.3	T	C	3362.77	536	56.9	-1.28	0.713	407	126	533	Y	MT-3194	716.807	0.747761
2260171	NC_000962.3	T	C	5209.77	558	54.92	-2.21	8.077	381	177	558	Y	MT-578	721.183	0.773729
2260171	NC_000962.3	T	C	2597.77	610	57.58	-2.755	0	491	118	609	Y	MT-2667	686.693	0.888315
2260171	NC_000962.3	T	C	2983.77	578	55.96	-3.061	36.207	453	123	576	Y	MT-289	757.674	0.762861
2260171	NC_000962.3	T	C	3014.77	575	57.53	-1.654	0.696	453	120	573	Y	MT-2769	687.439	0.836438
2260171	NC_000962.3	T	C	2449.77	565	56.5	-2.406	22.961	455	110	565	Y	MT-2706	701.488	0.805431
2260171	NC_000962.3	T	C	2333.77	602	56.61	-1.187	24.573	494	107	601	Y	MT-405	809.576	0.743599
2260171	NC_000962.3	T	C	1866.77	497	56.9	-2.191	20.99	406	88	494	Y	MT-6429	657.841	0.755502
2260171	NC_000962.3	T	C	3776.77	501	57.92	-1.625	10.326	366	134	500	Y	MT-2465	562.872	0.890078
2260171	NC_000962.3	T	C	3710.77	676	57.55	-2.217	0.711	524	150	674	Y	MT-2473	793.868	0.851527
2260171	NC_000962.3	T	C	2544.77	506	56.2	-2.792	3.739	395	109	504	Y	68995	710.925	0.711749
2260171	NC_000962.3	T	C	3223.52	530	57.08	-2.264	1.473	402	126	528	Y	MT-2720	667.441	0.794078
2260171	NC_000962.3	T	C	2842.77	516	55.76	-3.496	31.879	395	120	515	Y	MT-3255	645.747	0.799075
2260171	NC_000962.3	T	C	2311.77	515	57.18	-3.936	1.522	412	101	513	Y	MT-1549	632.614	0.814083
2260171	NC_000962.3	T	C	2032.77	484	56.75	-1.736	5.154	393	88	481	Y	MT-3787	609.73	0.793794
2260171	NC_000962.3	T	C	2540.77	616	57.03	-0.716	7.813	496	118	614	Y	MT-4166	780.291	0.789449
2260171	NC_000962.3	T	C	2164.77	563	56.74	-1.564	10.354	460	103	563	Y	MT-3341	795.415	0.707807
2260171	NC_000962.3	T	C	2935.77	538	56.97	-1.104	3.478	420	118	538	Y	MT-504	665.023	0.808995
2260174	NC_000962.3	C	T	2569.77	574	57.38	-0.41	6.027	463	110	573	Y	MT-2175	708.086	0.810636
2260174	NC_000962.3	C	T	2881.77	597	56.85	0.736	5.957	470	125	595	Y	MT-4942	684.058	0.872733
2260174	NC_000962.3	C	T	1887.77	684	57.18	0.053	20.565	580	103	683	Y	MT-467	829.937	0.824159
2260174	NC_000962.3	C	T	3418.77	737	57.49	0.527	0.704	588	147	735	Y	MT-0718	814.878	0.90443
2260174	NC_000962.3	C	T	2235.77	639	57.23	-0.512	8.401	529	110	639	Y	73787	778.122	0.821208
2260174	NC_000962.3	C	T	2718.77	525	56.36	-1.318	10.889	414	111	525	Y	MT-3673	674.031	0.778896
2260174	NC_000962.3	C	T	2695.77	574	57.27	-0.03	0.703	457	116	573	Y	MT-1103	724.505	0.792265
2260174	NC_000962.3	C	T	2360.77	483	57.37	2.751	1.52	381	101	482	Y	MT-1336	596.214	0.810112
2260174	NC_000962.3	C	T	3008.77	549	57.03	1.513	4.528	426	121	547	Y	MT-504	665.023	0.825535
2260174	NC_000962.3	C	T	2544.77	710	56.8	0.862	24.562	586	124	710	Y	MT-0712	929.442	0.763899
2260174	NC_000962.3	C	T	2151.77	498	56.46	0.167	22.061	399	96	495	Y	MT-5531	691.535	0.720137
2260174	NC_000962.3	C	T	1834.77	512	57	0.452	21.134	423	89	512	Y	MT-6429	657.841	0.778304
2260174	NC_000962.3	C	T	2201.77	574	56.8	0.859	10.408	470	103	573	Y	MT-3341	795.415	0.721636
2260174	NC_000962.3	C	T	3047.77	581	56.31	-0.212	12.525	456	124	580	Y	MT-5488	745.909	0.778915
2260174	NC_000962.3	C	T	2475.77	526	57.1	-0.391	2.432	423	103	526	Y	MT-2174	619.613	0.848917
2260174	NC_000962.3	C	T	2924.77	659	57.43	-1.158	0.725	529	130	659	Y	MT-5195	800.645	0.823086
2260174	NC_000962.3	C	T	2276.77	531	57.26	-1.337	1.577	430	100	530	Y	MT-1549	632.614	0.839374
2260174	NC_000962.3	C	T	2595.77	653	56.78	-0.133	25.352	534	118	652	Y	MT-2771	821.752	0.794644
2260174	NC_000962.3	C	T	5021.77	569	55.02	0.536	6.775	392	177	569	Y	MT-578	721.183	0.788981
2260174	NC_000962.3	C	T	2517.77	631	57.11	2.117	7.916	513	116	629	Y	MT-4166	780.291	0.808673
2260174	NC_000962.3	C	T	3451.77	550	56.98	1.274	2.472	420	129	549	Y	MT-3194	716.807	0.767292
2260174	NC_000962.3	C	T	3722.77	507	57.95	0.995	8.834	371	135	506	Y	MT-2465	562.872	0.900738
2260174	NC_000962.3	C	T	3065.77	614	57.06	1.558	3.51	486	126	612	Y	MT-2762	689.696	0.890247
2260174	NC_000962.3	C	T	2734.77	523	55.82	-0.93	35.839	404	119	523	Y	MT-3255	645.747	0.809915
2260174	NC_000962.3	C	T	2497.77	529	56.91	0.955	6.179	424	105	529	Y	78932	638.347	0.828703
2260174	NC_000962.3	C	T	2895.77	656	56.24	0.736	31.625	522	132	654	Y	MT-0080	858.628	0.76401
2260174	NC_000962.3	C	T	1497.77	435	57.11	1.191	12.272	361	73	434	Y	MT-6218	589.217	0.738268
2260174	NC_000962.3	C	T	2524.77	490	56.78	-0.994	10.387	385	105	490	Y	MT-389	674.259	0.726724
2260174	NC_000962.3	C	T	1872.77	597	57.13	1.146	21.208	499	98	597	Y	MT-567	777.127	0.768214
2260174	NC_000962.3	C	T	2722.77	512	56.25	-0.563	7.833	400	111	511	Y	68995	710.925	0.720188
2260174	NC_000962.3	C	T	2591.77	561	57.32	0.234	5.827	446	114	560	Y	MT-2184	678.348	0.827009
2260174	NC_000962.3	C	T	2545.77	629	57.65	0.217	0	511	118	629	Y	MT-2667	686.693	0.915984
2260174	NC_000962.3	C	T	3007.77	625	57.13	1.667	7.579	499	124	623	Y	MT-1212	748.265	0.835266
2260174	NC_000962.3	C	T	2272.77	617	56.7	1.481	22.404	508	108	616	Y	MT-405	809.576	0.762127
2260174	NC_000962.3	C	T	2034.77	572	56.81	0.421	15.899	470	100	570	Y	MT-3683	804.958	0.710596
2260174	NC_000962.3	C	T	2914.77	589	56.04	-0.374	39.118	467	122	589	Y	MT-289	757.674	0.777379
2260174	NC_000962.3	C	T	2294.77	423	56.03	0.165	32.472	325	96	421	Y	MT-3173	585.845	0.722034
2260174	NC_000962.3	C	T	1143.77	362	57.89	1.04	0	302	59	361	Y	MT-2665	424.731	0.852304
2260174	NC_000962.3	C	T	2358.77	629	56.8	-0.026	21.068	517	111	628	Y	MT-5983	804.62	0.781735
2260174	NC_000962.3	C	T	3709.77	630	56.69	1.104	7.212	484	145	629	Y	MT-1206	707.427	0.890551
2260174	NC_000962.3	C	T	2387.77	572	56.46	-0.388	26.904	460	109	569	Y	74856	795.746	0.718822
2260174	NC_000962.3	C	T	2906.77	584	57.57	0.884	0	463	120	583	Y	MT-2769	687.439	0.84953
2260174	NC_000962.3	C	T	2692.77	589	57.37	0.45	0.723	475	114	589	Y	MT-1605	704.559	0.835984
2260174	NC_000962.3	C	T	2588.77	619	56.68	0.333	13.908	501	117	618	Y	MT-0972	783.34	0.790206
2260174	NC_000962.3	C	T	3390.77	604	56.92	-1.168	0.682	466	138	604	Y	MT-1393	744.375	0.811419
2260174	NC_000962.3	C	T	2467.77	448	57.02	0.666	0	347	99	446	Y	MT-6084	570.377	0.785445
2260174	NC_000962.3	C	T	3143.77	608	57.66	1.695	1.485	478	129	607	Y	MT-1684	680.222	0.893826
2260174	NC_000962.3	C	T	2517.77	573	56.55	-0.142	25.218	461	111	572	Y	MT-2706	701.488	0.816835
2260174	NC_000962.3	C	T	2216.77	534	57.69	0.731	1.583	431	101	532	Y	MT-2356	630.417	0.847058
2260174	NC_000962.3	C	T	1653.77	426	56.7	-0.133	22.513	348	77	425	Y	MT-6226	594.349	0.716751
2260174	NC_000962.3	C	T	2009.77	491	56.8	0.454	6.495	398	92	490	Y	MT-3787	609.73	0.805274
2260174	NC_000962.3	C	T	1856.77	600	57.91	1.178	2.747	504	95	599	Y	MT-5543	723.238	0.829602
2260174	NC_000962.3	C	T	2395.77	673	56.93	0.125	16.907	558	114	672	Y	MT-1838	809.501	0.831376
2260174	NC_000962.3	C	T	2589.77	517	57.23	0.228	0.702	407	109	516	Y	MT-2474	619.076	0.835116
2260174	NC_000962.3	C	T	4101.77	838	56.76	1.091	11.324	665	173	838	Y	MT-2151	952.498	0.879792
2260174	NC_000962.3	C	T	3711.77	688	57.59	0.559	0.713	536	152	688	Y	MT-2473	793.868	0.866643
2260174	NC_000962.3	C	T	2065.77	523	56.5	1.055	18.816	425	98	523	Y	MT-2800	672.144	0.778107
2260174	NC_000962.3	C	T	3140.77	543	57.15	0.634	1.478	416	126	542	Y	MT-2720	667.441	0.813555
2260174	NC_000962.3	C	T	2594.77	595	57.1	0.71	6.231	479	116	595	Y	MT-1466	761.306	0.781552
2260174	NC_000962.3	C	T	2635.77	539	57.26	0.222	1.486	426	113	539	Y	MT-3271	654.699	0.823279
2260174	NC_000962.3	C	T	1994.77	639	57.45	0.204	13.623	533	105	638	Y	MT-4854	791.843	0.806978
2260174	NC_000962.3	C	T	2199.77	602	56.74	-0.398	25.737	498	104	602	Y	MT-5383	810.086	0.743131
2260199	NC_000962.3	C	T	2511.77	653	57.64	12.85	2.559	537	115	652	Y	MT-1605	704.559	0.926821
2260199	NC_000962.3	C	T	1599.77	717	57.31	12.154	18.689	614	102	716	Y	MT-467	829.937	0.863921
2260199	NC_000962.3	C	T	2166.77	670	57.36	11.883	8.447	558	110	668	Y	73787	778.122	0.861047
2260199	NC_000962.3	C	T	2173.77	651	56.87	12.077	27.437	541	108	649	Y	MT-405	809.576	0.804125
2260199	NC_000962.3	C	T	1949.77	667	57.56	11.646	14.012	563	104	667	Y	MT-4854	791.843	0.842339
2260199	NC_000962.3	C	T	2011.77	646	56.97	11.957	25.123	540	104	644	Y	MT-5383	810.086	0.797446
2260199	NC_000962.3	C	T	1814.77	531	57.04	11.293	4.165	440	89	529	Y	MT-3787	609.73	0.870877
2260199	NC_000962.3	C	T	1193.77	371	57.95	8.85	0.543	312	59	371	Y	MT-2665	424.731	0.873494
2260199	NC_000962.3	C	T	2930.77	689	57.54	12.342	1.546	559	129	688	Y	MT-5195	800.645	0.860556
2260199	NC_000962.3	C	T	2219.77	457	56.34	10.836	30.193	360	96	456	Y	MT-3173	585.845	0.78007
2260199	NC_000962.3	C	T	2595.77	562	57.38	12.495	2.361	448	112	560	Y	MT-3271	654.699	0.85841
2260199	NC_000962.3	C	T	2557.77	655	56.87	13.335	13.985	538	117	655	Y	MT-0972	783.34	0.836163
2260199	NC_000962.3	C	T	2891.77	699	56.48	13.428	25.095	566	133	699	Y	MT-0080	858.628	0.814089
2260199	NC_000962.3	C	T	2195.77	550	57.36	12.792	4.695	450	100	550	Y	MT-1549	632.614	0.869408
2260199	NC_000962.3	C	T	1549.77	471	57.02	11.065	16.161	393	77	470	Y	MT-6226	594.349	0.792464
2260199	NC_000962.3	C	T	5001.77	611	55.38	14.374	12.741	432	177	609	Y	MT-578	721.183	0.847219
2260199	NC_000962.3	C	T	2254.77	665	56.98	12.89	25.032	551	111	662	Y	MT-5983	804.62	0.826477
2260199	NC_000962.3	C	T	2174.77	547	57.69	11.496	6.069	445	101	546	Y	MT-1336	596.214	0.917456
2260199	NC_000962.3	C	T	1851.77	635	57.3	11.526	19.373	535	98	633	Y	MT-567	777.127	0.817112
2260199	NC_000962.3	C	T	1760.77	634	58.02	11.895	3.942	535	95	630	Y	MT-5543	723.238	0.876613
2260199	NC_000962.3	C	T	1692.77	547	57.19	10.429	19.194	457	89	546	Y	MT-6429	657.841	0.831508
2260199	NC_000962.3	C	T	3681.77	664	56.87	13.595	10.122	517	146	663	Y	MT-1206	707.427	0.938613
2260199	NC_000962.3	C	T	3067.77	649	57.81	12.767	4.486	518	130	648	Y	MT-1684	680.222	0.9541
2260199	NC_000962.3	C	T	2467.77	694	56.97	12.816	27.321	575	118	693	Y	MT-2771	821.752	0.844537
2260199	NC_000962.3	C	T	2532.77	576	56.68	12.235	6.482	464	111	575	Y	68995	710.925	0.810212
2260199	NC_000962.3	C	T	2888.77	652	57.23	12.623	6.069	526	126	652	Y	MT-2762	689.696	0.945344
2260199	NC_000962.3	C	T	2434.77	683	57.84	13.072	2.492	562	118	680	Y	MT-2667	686.693	0.994622
2260199	NC_000962.3	C	T	2075.77	574	57.86	12.052	2.544	472	101	573	Y	MT-2356	630.417	0.910508
2260199	NC_000962.3	C	T	2549.77	527	56.9	11.725	12.273	421	105	526	Y	78932	638.347	0.82557
2260199	NC_000962.3	C	T	2239.77	705	57.08	12.758	16.899	590	114	704	Y	MT-1838	809.501	0.870907
2260199	NC_000962.3	C	T	1960.77	562	56.75	11.45	23.268	463	98	561	Y	MT-2800	672.144	0.83613
2260199	NC_000962.3	C	T	1495.77	440	57.14	9.424	12.272	365	74	439	Y	MT-6218	589.217	0.746754
2260199	NC_000962.3	C	T	2391.77	666	57.26	11.572	11.722	550	116	666	Y	MT-4166	780.291	0.853528
2260199	NC_000962.3	C	T	2909.77	644	57.21	13.481	12.229	517	126	643	Y	MT-1212	748.265	0.860658
2260199	NC_000962.3	C	T	2324.77	623	56.83	12.747	22.404	513	110	623	Y	MT-2706	701.488	0.888112
2260199	NC_000962.3	C	T	2103.77	545	56.78	11.342	21.068	448	96	544	Y	MT-5531	691.535	0.788102
2260199	NC_000962.3	C	T	2024.77	631	57.1	12.227	14.896	528	103	631	Y	MT-3341	795.415	0.793297
2260199	NC_000962.3	C	T	2346.77	498	57.33	12.138	0.706	398	98	496	Y	MT-6084	570.377	0.873107
2260199	NC_000962.3	C	T	2598.77	601	57.5	12.912	3.671	487	114	601	Y	MT-2184	678.348	0.885976
2260199	NC_000962.3	C	T	2450.77	614	57.56	12.319	4.859	503	111	614	Y	MT-2175	708.086	0.867126
2260199	NC_000962.3	C	T	2613.77	635	57.54	12.704	1.591	518	115	633	Y	MT-1103	724.505	0.87646
2260199	NC_000962.3	C	T	3317.77	675	57.25	13.793	3.352	532	138	670	Y	MT-1393	744.375	0.906801
2260199	NC_000962.3	C	T	2473.77	758	57.01	13.008	22.636	633	125	758	Y	MT-0712	929.442	0.815543
2260199	NC_000962.3	C	T	3116.77	793	57.67	14.207	3.591	647	145	792	Y	MT-0718	814.878	0.973152
2260199	NC_000962.3	C	T	2851.77	634	57.04	13.315	4.774	508	125	633	Y	MT-4942	684.058	0.926822
2260199	NC_000962.3	C	T	3381.77	598	57.23	13.185	5.771	468	130	598	Y	MT-3194	716.807	0.834255
2260199	NC_000962.3	C	T	3137.77	588	57.37	13.256	5.608	458	128	586	Y	MT-2720	667.441	0.880977
2260199	NC_000962.3	C	T	3638.77	748	57.79	14.105	0.706	596	152	748	Y	MT-2473	793.868	0.942222
2260199	NC_000962.3	C	T	3852.77	902	56.99	15.309	13.846	727	172	899	Y	MT-2151	952.498	0.946984
2260199	NC_000962.3	C	T	2720.77	622	57.23	12.717	6.263	506	116	622	Y	MT-1466	761.306	0.817017
2260199	NC_000962.3	C	T	2889.77	621	56.56	12.984	15.038	498	123	621	Y	MT-5488	745.909	0.832541
2260199	NC_000962.3	C	T	1938.77	640	57.15	11.63	12.402	539	101	640	Y	MT-3683	804.958	0.795073
2260199	NC_000962.3	C	T	3759.77	553	58.12	11.906	2.107	418	135	553	Y	MT-2465	562.872	0.982461
2260199	NC_000962.3	C	T	2579.77	566	56.63	11.903	9.373	453	112	565	Y	MT-3673	674.031	0.839724
2260199	NC_000962.3	C	T	2716.77	553	56.06	11.09	30.892	433	119	552	Y	MT-3255	645.747	0.856373
2260199	NC_000962.3	C	T	2386.77	547	57.21	12.169	5.927	441	105	546	Y	MT-2174	619.613	0.882809
2260199	NC_000962.3	C	T	2919.77	583	57.21	12.152	3.492	461	121	582	Y	MT-504	665.023	0.876661
2260199	NC_000962.3	C	T	2852.77	627	57.74	12.629	1.54	506	121	627	Y	MT-2769	687.439	0.912081
2260199	NC_000962.3	C	T	2687.77	627	56.29	13.132	38.88	504	122	626	Y	MT-289	757.674	0.827533
2260199	NC_000962.3	C	T	2164.77	626	56.77	12.607	27.114	516	110	626	Y	74856	795.746	0.786683
2260199	NC_000962.3	C	T	2544.77	551	57.41	12.117	4.519	441	108	549	Y	MT-2474	619.076	0.890036
2260199	NC_000962.3	C	T	2408.77	533	57.05	11.873	10.629	429	104	533	Y	MT-389	674.259	0.790497
2260212	NC_000962.3	G	T	2296.77	699	57.39	6.295	11.803	583	115	698	K	MT-4166	780.291	0.89582
2260212	NC_000962.3	G	T	2733.77	638	56.35	8.41	36.729	515	123	638	K	MT-289	757.674	0.842051
2260212	NC_000962.3	G	T	1565.77	568	57.3	6.536	20.529	480	88	568	K	MT-6429	657.841	0.863431
2260212	NC_000962.3	G	T	2101.77	558	57.4	8.862	4.707	457	99	556	K	MT-1549	632.614	0.882054
2260212	NC_000962.3	G	T	1762.77	669	57.26	7.26	14.936	566	103	669	K	MT-3341	795.415	0.84107
2260212	NC_000962.3	G	T	2373.77	634	57.64	7.5	4.826	520	114	634	K	MT-2184	678.348	0.934623
2260212	NC_000962.3	G	T	3006.77	606	57.45	7.869	5.81	481	125	606	K	MT-2720	667.441	0.907945
2260212	NC_000962.3	G	T	2424.77	598	56.8	7.727	7.853	486	112	598	K	68995	710.925	0.841158
2260212	NC_000962.3	G	T	2052.77	642	56.85	7.816	22.502	535	107	642	K	74856	795.746	0.80679
2260212	NC_000962.3	G	T	2709.77	611	57.34	6.914	5.979	491	120	611	K	MT-504	665.023	0.918765
2260212	NC_000962.3	G	T	1685.77	646	57.18	6.691	13.183	546	100	646	K	MT-3683	804.958	0.802526
2260212	NC_000962.3	G	T	3632.77	667	56.88	7.502	13.238	521	146	667	K	MT-1206	707.427	0.942853
2260212	NC_000962.3	G	T	1996.77	676	57.59	8.102	13.852	572	104	676	K	MT-4854	791.843	0.853705
2260212	NC_000962.3	G	T	2403.77	550	57.23	7.517	5.927	444	104	548	K	MT-2174	619.613	0.887651
2260212	NC_000962.3	G	T	1459.77	454	57.23	5.744	16.161	381	73	454	K	MT-6218	589.217	0.770514
2260212	NC_000962.3	G	T	2343.77	688	57.86	8.59	3.528	570	118	688	K	MT-2667	686.693	1.0019
2260212	NC_000962.3	G	T	2322.77	527	57.48	7.177	1.546	428	99	527	K	MT-6084	570.377	0.92395
2260212	NC_000962.3	G	T	1527.77	638	58.04	6.355	3.982	543	95	638	K	MT-5543	723.238	0.882144
2260212	NC_000962.3	G	T	2876.77	607	56.48	7.24	16.903	482	124	606	K	MT-5488	745.909	0.813772
2260212	NC_000962.3	G	T	1794.77	539	57.09	5.918	8.756	449	89	538	K	MT-3787	609.73	0.883998
2260212	NC_000962.3	G	T	2282.77	772	57.07	7.212	29.344	646	126	772	K	MT-0712	929.442	0.830606
2260212	NC_000962.3	G	T	3663.77	570	58.18	6.981	1.326	435	134	569	K	MT-2465	562.872	1.01266
2260212	NC_000962.3	G	T	2532.77	665	56.92	8.152	13.967	546	118	664	K	MT-0972	783.34	0.848929
2260212	NC_000962.3	G	T	2060.77	566	57.82	6.389	3.571	465	101	566	K	MT-2356	630.417	0.897818
2260212	NC_000962.3	G	T	1597.77	730	57.36	7.29	18.689	627	103	730	K	MT-467	829.937	0.879585
2260212	NC_000962.3	G	T	1634.77	661	57.41	6.799	23.075	563	98	661	K	MT-567	777.127	0.850569
2260212	NC_000962.3	G	T	1915.77	563	56.76	6.455	30.106	466	96	562	K	MT-2800	672.144	0.837618
2260212	NC_000962.3	G	T	2091.77	684	57.03	6.575	27.05	576	108	684	K	MT-405	809.576	0.844887
2260212	NC_000962.3	G	T	2258.77	655	56.93	7.428	24.934	544	111	655	K	MT-5983	804.62	0.814049
2260212	NC_000962.3	G	T	3519.77	777	57.87	8.046	1.508	624	151	775	K	MT-2473	793.868	0.978752
2260212	NC_000962.3	G	T	2888.77	706	57.6	9.279	1.541	575	131	706	K	MT-5195	800.645	0.881789
2260212	NC_000962.3	G	T	2263.77	546	57.01	7.351	10.64	440	106	546	K	78932	638.347	0.855334
2260212	NC_000962.3	G	T	2907.77	819	57.74	8.956	3.593	674	145	819	K	MT-0718	814.878	1.00506
2260212	NC_000962.3	G	T	2784.77	658	57.85	7.976	3.571	538	120	658	K	MT-2769	687.439	0.957176
2260212	NC_000962.3	G	T	2453.77	710	57.04	8.43	25.106	591	118	709	K	MT-2771	821.752	0.864008
2260212	NC_000962.3	G	T	1140.77	392	58.06	5.861	1.108	330	61	391	K	MT-2665	424.731	0.922937
2260212	NC_000962.3	G	T	2151.77	477	56.49	6.905	27.712	380	97	477	K	MT-3173	585.845	0.814209
2260212	NC_000962.3	G	T	2297.77	568	57.23	8.874	11.132	463	104	567	K	MT-389	674.259	0.842406
2260212	NC_000962.3	G	T	2476.77	549	57.4	7.768	3.353	438	111	549	K	MT-2474	619.076	0.886806
2260212	NC_000962.3	G	T	2346.77	662	57.67	7.981	2.559	546	115	661	K	MT-1605	704.559	0.939595
2260212	NC_000962.3	G	T	3847.77	918	57.05	8.718	15.81	746	171	917	K	MT-2151	952.498	0.963782
2260212	NC_000962.3	G	T	2436.77	638	57.65	8.176	6.086	526	111	637	K	MT-2175	708.086	0.90102
2260212	NC_000962.3	G	T	2761.77	669	57.32	7.297	16.751	543	124	667	K	MT-1212	748.265	0.894068
2260212	NC_000962.3	G	T	2499.77	638	57.55	7.411	1.598	522	116	638	K	MT-1103	724.505	0.880601
2260212	NC_000962.3	G	T	1826.77	669	57.07	7.836	20.51	565	104	669	K	MT-5383	810.086	0.825838
2260212	NC_000962.3	G	T	2535.77	660	57.39	8.073	7.992	544	116	660	K	MT-1466	761.306	0.866931
2260212	NC_000962.3	G	T	2963.77	664	57.86	7.266	8.628	536	128	664	K	MT-1684	680.222	0.976152
2260212	NC_000962.3	G	T	4785.77	641	55.6	8.65	14.318	464	177	641	K	MT-578	721.183	0.888817
2260212	NC_000962.3	G	T	1315.77	467	57	5.948	18.228	387	78	465	K	MT-6226	594.349	0.785734
2260212	NC_000962.3	G	T	3101.77	690	57.31	9.494	3.363	551	139	690	K	MT-1393	744.375	0.926952
2260212	NC_000962.3	G	T	2723.77	718	56.58	7.846	32.062	585	132	717	K	MT-0080	858.628	0.836218
2260212	NC_000962.3	G	T	2146.77	570	57.78	6.213	6.07	469	101	570	K	MT-1336	596.214	0.956033
2260212	NC_000962.3	G	T	2730.77	671	57.21	7.766	6.247	546	125	671	K	MT-4942	684.058	0.980911
2260212	NC_000962.3	G	T	3160.77	618	57.32	7.352	10.239	488	130	618	K	MT-3194	716.807	0.862157
2260212	NC_000962.3	G	T	2525.77	567	56.64	8.088	9.385	453	113	566	K	MT-3673	674.031	0.841208
2260212	NC_000962.3	G	T	2420.77	594	57.52	7.803	2.475	482	110	592	K	MT-3271	654.699	0.907287
2260212	NC_000962.3	G	T	1837.77	565	56.89	6.606	21.213	469	96	565	K	MT-5531	691.535	0.817023
2260212	NC_000962.3	G	T	2291.77	700	57.06	7.074	18.928	584	115	699	K	MT-1838	809.501	0.86473
2260212	NC_000962.3	G	T	2716.77	538	55.94	6.741	23.812	419	118	537	K	MT-3255	645.747	0.833144
2260212	NC_000962.3	G	T	2085.77	689	57.44	7.89	8.383	578	110	688	K	73787	778.122	0.885465
2260212	NC_000962.3	G	T	2782.77	691	57.39	7.341	6.113	561	129	690	K	MT-2762	689.696	1.00189
2260212	NC_000962.3	G	T	2284.77	633	56.88	7.414	18.709	519	112	631	K	MT-2706	701.488	0.902368
2260214	NC_000962.3	G	C	2491.77	543	56.99	6.132	10.606	435	106	541	S	78932	638.347	0.850635
2260214	NC_000962.3	G	C	2300.77	563	57.21	7.636	11.076	457	106	563	S	MT-389	674.259	0.834991
2260214	NC_000962.3	G	C	2004.77	697	57.47	6.974	6.939	587	110	697	S	73787	778.122	0.895746
2260214	NC_000962.3	G	C	3557.77	666	56.88	5.945	11.802	519	145	664	S	MT-1206	707.427	0.94144
2260214	NC_000962.3	G	C	2396.77	639	57.66	7.123	4.857	527	111	638	S	MT-2175	708.086	0.902433
2260214	NC_000962.3	G	C	1787.77	655	57.39	5.27	19.531	556	99	655	S	MT-567	777.127	0.842848
2260214	NC_000962.3	G	C	2785.77	661	57.86	6.357	2.448	537	122	659	S	MT-2769	687.439	0.96154
2260214	NC_000962.3	G	C	1879.77	683	57.32	6.195	13.224	576	103	679	S	MT-3341	795.415	0.858671
2260214	NC_000962.3	G	C	2102.77	696	57.38	5.171	10.163	579	115	694	S	MT-4166	780.291	0.891975
2260214	NC_000962.3	G	C	2173.77	657	56.94	6.254	21.054	544	111	655	S	MT-5983	804.62	0.816535
2260214	NC_000962.3	G	C	2396.77	706	57.03	6.952	21.213	586	119	705	S	MT-2771	821.752	0.85914
2260214	NC_000962.3	G	C	2927.77	606	56.47	5.785	16.882	482	124	606	S	MT-5488	745.909	0.812432
2260214	NC_000962.3	G	C	2791.77	720	56.59	6.579	29.545	584	133	717	S	MT-0080	858.628	0.838547
2260214	NC_000962.3	G	C	2493.77	659	57.39	6.804	7.689	541	116	657	S	MT-1466	761.306	0.865618
2260214	NC_000962.3	G	C	2756.77	632	56.32	6.95	39.324	509	123	632	S	MT-289	757.674	0.834132
2260214	NC_000962.3	G	C	2540.77	635	57.54	6.215	0.73	517	115	632	S	MT-1103	724.505	0.87646
2260214	NC_000962.3	G	C	1785.77	631	58.01	5.072	6.546	532	95	627	S	MT-5543	723.238	0.872465
2260214	NC_000962.3	G	C	3304.77	620	57.33	6.088	11.709	490	130	620	S	MT-3194	716.807	0.864947
2260214	NC_000962.3	G	C	1724.77	724	57.34	6.132	20.859	616	103	719	S	MT-467	829.937	0.872355
2260214	NC_000962.3	G	C	1913.77	571	56.93	5.692	21.331	475	96	571	S	MT-5531	691.535	0.825699
2260214	NC_000962.3	G	C	2046.77	572	57.79	5.028	4.89	469	101	570	S	MT-1336	596.214	0.959387
2260214	NC_000962.3	G	C	1960.77	670	57.57	6.815	13.681	562	104	666	S	MT-4854	791.843	0.846127
2260214	NC_000962.3	G	C	1583.77	570	57.31	5.482	17.127	480	90	570	S	MT-6429	657.841	0.866471
2260214	NC_000962.3	G	C	2495.77	688	57.86	7.226	4.608	565	120	685	S	MT-2667	686.693	1.0019
2260214	NC_000962.3	G	C	2133.77	636	56.82	6.578	22.347	525	108	633	S	74856	795.746	0.79925
2260214	NC_000962.3	G	C	1762.77	541	57.1	4.706	5.472	452	89	541	S	MT-3787	609.73	0.887278
2260214	NC_000962.3	G	C	2156.77	637	56.9	6.216	16.704	521	114	635	S	MT-2706	701.488	0.90807
2260214	NC_000962.3	G	C	2339.77	600	57.54	6.849	3.453	486	112	598	S	MT-3271	654.699	0.916452
2260214	NC_000962.3	G	C	2168.77	471	56.45	5.706	30.193	373	97	470	S	MT-3173	585.845	0.803967
2260214	NC_000962.3	G	C	2665.77	543	55.98	5.874	26.16	423	119	542	S	MT-3255	645.747	0.840887
2260214	NC_000962.3	G	C	2415.77	552	57.24	6.785	5.921	447	103	550	S	MT-2174	619.613	0.890879
2260214	NC_000962.3	G	C	2539.77	550	57.4	6.558	3.354	442	108	550	S	MT-2474	619.076	0.888421
2260214	NC_000962.3	G	C	1113.77	391	58.05	4.632	1.831	331	59	390	S	MT-2665	424.731	0.920583
2260214	NC_000962.3	G	C	2193.77	695	57.03	5.724	19.142	578	115	693	S	MT-1838	809.501	0.858554
2260214	NC_000962.3	G	C	2206.77	523	57.46	6.117	0.711	421	98	519	S	MT-6084	570.377	0.916937
2260214	NC_000962.3	G	C	2437.77	658	56.89	6.708	15.972	541	117	658	S	MT-0972	783.34	0.839993
2260214	NC_000962.3	G	C	2863.77	686	57.37	6.316	4.839	556	126	682	S	MT-2762	689.696	0.994641
2260214	NC_000962.3	G	C	2379.77	776	57.08	6.182	22.791	650	124	774	S	MT-0712	929.442	0.83491
2260214	NC_000962.3	G	C	1474.77	471	57.02	5.012	18.228	393	78	471	S	MT-6226	594.349	0.792464
2260214	NC_000962.3	G	C	2082.77	547	57.34	7.436	3.597	447	98	545	S	MT-1549	632.614	0.864666
2260214	NC_000962.3	G	C	2035.77	571	57.84	5.35	2.544	468	102	570	S	MT-2356	630.417	0.90575
2260214	NC_000962.3	G	C	2688.77	619	57.37	5.936	6.034	499	120	619	S	MT-504	665.023	0.930795
2260214	NC_000962.3	G	C	1879.77	647	57.19	5.343	10.563	545	102	647	S	MT-3683	804.958	0.803769
2260214	NC_000962.3	G	C	3579.77	775	57.87	6.557	2.379	620	151	771	S	MT-2473	793.868	0.976233
2260214	NC_000962.3	G	C	3735.77	576	58.2	5.788	1.338	437	135	572	S	MT-2465	562.872	1.02332
2260214	NC_000962.3	G	C	2014.77	666	57.06	6.666	20.492	561	104	665	S	MT-5383	810.086	0.822135
2260214	NC_000962.3	G	C	2439.77	596	56.79	6.594	7.884	484	111	595	S	68995	710.925	0.838344
2260214	NC_000962.3	G	C	2487.77	661	57.67	6.527	3.571	543	114	657	S	MT-1605	704.559	0.938175
2260214	NC_000962.3	G	C	3059.77	812	57.72	7.289	3.591	663	146	809	S	MT-0718	814.878	0.996468
2260214	NC_000962.3	G	C	2865.77	671	57.33	6.073	15.993	547	124	671	S	MT-1212	748.265	0.896741
2260214	NC_000962.3	G	C	3212.77	690	57.31	7.84	4.394	550	139	689	S	MT-1393	744.375	0.926952
2260214	NC_000962.3	G	C	1273.77	451	57.21	4.559	14.334	378	73	451	S	MT-6218	589.217	0.765423
2260214	NC_000962.3	G	C	3054.77	609	57.47	6.34	4.456	482	126	608	S	MT-2720	667.441	0.91244
2260214	NC_000962.3	G	C	3147.77	664	57.86	6.023	5.74	532	129	661	S	MT-1684	680.222	0.976152
2260214	NC_000962.3	G	C	2515.77	629	57.62	6.078	4.86	511	114	625	S	MT-2184	678.348	0.927253
2260214	NC_000962.3	G	C	3889.77	914	57.03	6.706	15.841	742	172	914	S	MT-2151	952.498	0.959582
2260214	NC_000962.3	G	C	2061.77	680	57.01	5.406	22.627	569	109	678	S	MT-405	809.576	0.839946
2260214	NC_000962.3	G	C	2773.77	661	57.17	6.295	6.016	534	124	658	S	MT-4942	684.058	0.966292
2260214	NC_000962.3	G	C	2510.77	556	56.57	6.848	10.995	444	111	555	S	MT-3673	674.031	0.824888
2260214	NC_000962.3	G	C	2882.77	710	57.61	7.951	2.518	578	130	708	S	MT-5195	800.645	0.886785
2260214	NC_000962.3	G	C	4750.77	639	55.59	7.339	12.737	464	175	639	S	MT-578	721.183	0.886044
2260214	NC_000962.3	G	C	1992.77	560	56.74	4.998	28.185	460	97	557	S	MT-2800	672.144	0.833155
2260220	NC_000962.3	C	T	2132.77	559	57.8	0.8	3.549	458	100	558	Y	MT-2356	630.417	0.886715
2260220	NC_000962.3	C	T	4759.77	644	55.72	2.421	14.318	471	172	643	Y	MT-578	721.183	0.892977
2260220	NC_000962.3	C	T	2525.77	565	56.66	3.03	10.947	452	111	563	Y	MT-3673	674.031	0.83824
2260220	NC_000962.3	C	T	1840.77	677	57.14	1.57	20.428	571	105	676	Y	MT-405	809.576	0.83624
2260220	NC_000962.3	C	T	3523.77	778	57.93	1.855	2.402	628	149	777	Y	MT-2473	793.868	0.980012
2260220	NC_000962.3	C	T	2595.77	535	56.11	2.093	23.67	419	114	533	Y	MT-3255	645.747	0.828498
2260220	NC_000962.3	C	T	2835.77	676	57.39	1.153	7.376	550	125	675	Y	MT-2762	689.696	0.980142
2260220	NC_000962.3	C	T	2203.77	624	56.79	1.869	22.4	516	107	623	Y	74856	795.746	0.78417
2260220	NC_000962.3	C	T	2744.77	712	56.6	1.546	29.545	581	131	712	Y	MT-0080	858.628	0.82923
2260220	NC_000962.3	C	T	2289.77	677	57.88	2.061	4.824	562	114	676	Y	MT-2667	686.693	0.985885
2260220	NC_000962.3	C	T	2611.77	672	57.39	2.132	15.02	553	119	672	Y	MT-1212	748.265	0.898078
2260220	NC_000962.3	C	T	2382.77	595	56.82	2.084	7.894	483	110	593	Y	68995	710.925	0.836938
2260220	NC_000962.3	C	T	1455.77	456	57.01	1.123	16.057	381	75	456	Y	MT-6226	594.349	0.767226
2260220	NC_000962.3	C	T	2304.77	624	56.9	1.935	16.788	514	109	623	Y	MT-2706	701.488	0.889538
2260220	NC_000962.3	C	T	2124.77	705	57.13	2.883	20.387	590	113	703	Y	MT-2771	821.752	0.857923
2260220	NC_000962.3	C	T	2563.77	643	57.66	1.317	3.591	529	113	642	Y	MT-1605	704.559	0.912628
2260220	NC_000962.3	C	T	2472.77	524	56.99	1.493	10.643	419	102	521	Y	78932	638.347	0.82087
2260220	NC_000962.3	C	T	1959.77	669	57.47	2.597	6.973	559	107	666	Y	73787	778.122	0.859762
2260220	NC_000962.3	C	T	1684.77	701	57.33	1.84	18.689	598	100	698	Y	MT-467	829.937	0.844642
2260220	NC_000962.3	C	T	1747.77	644	57.26	0.81	13.213	547	97	644	Y	MT-3683	804.958	0.800042
2260220	NC_000962.3	C	T	2555.77	624	57.46	2.141	4.835	508	115	623	Y	MT-504	665.023	0.938313
2260220	NC_000962.3	C	T	2237.77	757	57.11	1.183	27.083	638	119	757	Y	MT-0712	929.442	0.814467
2260220	NC_000962.3	C	T	1854.77	651	57.62	2.213	12.06	552	99	651	Y	MT-4854	791.843	0.822133
2260220	NC_000962.3	C	T	1274.77	456	57.29	1.535	14.214	383	72	455	Y	MT-6218	589.217	0.773908
2260220	NC_000962.3	C	T	2557.77	648	57.32	1.717	7.686	529	119	648	Y	MT-4942	684.058	0.947288
2260220	NC_000962.3	C	T	2307.77	686	57.4	0.594	11.851	572	113	685	Y	MT-4166	780.291	0.879159
2260220	NC_000962.3	C	T	1861.77	558	56.99	1.708	23.561	462	93	555	Y	MT-5531	691.535	0.806901
2260220	NC_000962.3	C	T	1737.77	528	57.1	0.865	6.819	441	87	528	Y	MT-3787	609.73	0.865957
2260220	NC_000962.3	C	T	2147.77	677	57.04	1.431	19.142	564	111	675	Y	MT-1838	809.501	0.836318
2260220	NC_000962.3	C	T	2555.77	619	56.37	2.177	33.905	499	118	617	Y	MT-289	757.674	0.816974
2260220	NC_000962.3	C	T	2386.77	562	57.2	3.218	11.084	455	105	560	Y	MT-389	674.259	0.833508
2260220	NC_000962.3	C	T	2231.77	541	57.45	1.99	3.498	436	105	541	Y	MT-2474	619.076	0.873883
2260220	NC_000962.3	C	T	2133.77	535	57.28	3.287	4.695	435	100	535	Y	MT-1549	632.614	0.845697
2260220	NC_000962.3	C	T	934.77	378	58.09	1.046	1.887	321	56	377	Y	MT-2665	424.731	0.889975
2260220	NC_000962.3	C	T	1975.77	645	56.99	2.007	22.627	541	103	644	Y	MT-5383	810.086	0.796212
2260220	NC_000962.3	C	T	1657.77	563	57.27	1.522	16.958	474	89	563	Y	MT-6429	657.841	0.85583
2260220	NC_000962.3	C	T	2164.77	646	56.95	1.822	21.203	536	110	646	Y	MT-5983	804.62	0.802863
2260220	NC_000962.3	C	T	1805.77	565	56.91	0.983	30.42	470	93	563	Y	MT-2800	672.144	0.840594
2260220	NC_000962.3	C	T	1656.77	645	57.44	1.321	19.638	549	95	644	Y	MT-567	777.127	0.82998
2260220	NC_000962.3	C	T	2302.77	641	56.83	1.783	14.086	525	116	641	Y	MT-0972	783.34	0.818291
2260220	NC_000962.3	C	T	3328.77	664	56.98	1.394	13.539	523	140	663	Y	MT-1206	707.427	0.938613
2260220	NC_000962.3	C	T	3057.77	818	57.77	2.507	3.57	675	142	817	Y	MT-0718	814.878	1.00383
2260220	NC_000962.3	C	T	2137.77	467	56.46	1.984	25.442	371	95	466	Y	MT-3173	585.845	0.797139
2260220	NC_000962.3	C	T	2273.77	629	57.68	2.773	3.705	522	107	629	Y	MT-2175	708.086	0.88831
2260220	NC_000962.3	C	T	3431.77	573	58.26	1.573	0.627	443	129	572	Y	MT-2465	562.872	1.01799
2260220	NC_000962.3	C	T	2831.77	707	57.71	4.14	0.728	577	126	703	Y	MT-5195	800.645	0.883038
2260220	NC_000962.3	C	T	2540.77	625	57.6	1.757	4.835	511	114	625	Y	MT-2184	678.348	0.921356
2260220	NC_000962.3	C	T	2527.77	648	57.4	2.506	6.267	532	114	646	Y	MT-1466	761.306	0.851169
2260220	NC_000962.3	C	T	1871.77	684	57.38	2.174	13.183	582	101	683	Y	MT-3341	795.415	0.859928
2260220	NC_000962.3	C	T	2643.77	661	57.91	2.069	2.536	544	116	660	Y	MT-2769	687.439	0.96154
2260220	NC_000962.3	C	T	3834.77	897	57	1.085	17.766	724	171	895	Y	MT-2151	952.498	0.941734
2260220	NC_000962.3	C	T	3180.76	679	57.35	2.716	3.371	543	135	678	Y	MT-1393	744.375	0.912175
2260220	NC_000962.3	C	T	1987.77	573	57.9	0.44	4.887	475	98	573	Y	MT-1336	596.214	0.961064
2260220	NC_000962.3	C	T	2246.77	506	57.48	1.264	0.708	409	96	505	Y	MT-6084	570.377	0.887133
2260220	NC_000962.3	C	T	1547.77	613	58.11	0.84	5.256	522	89	611	Y	MT-5543	723.238	0.847577
2260220	NC_000962.3	C	T	2898.77	655	57.89	1.198	7.04	527	126	653	Y	MT-1684	680.222	0.962921
2260220	NC_000962.3	C	T	2327.77	603	57.62	2.902	2.471	494	108	602	Y	MT-3271	654.699	0.921034
2260220	NC_000962.3	C	T	2341.77	637	57.67	2.144	1.603	527	110	637	Y	MT-1103	724.505	0.879221
2260220	NC_000962.3	C	T	3115.77	638	57.43	1.851	11.798	509	127	636	Y	MT-3194	716.807	0.890058
2260220	NC_000962.3	C	T	2636.77	605	56.63	1.418	13.24	486	118	604	Y	MT-5488	745.909	0.811091
2260220	NC_000962.3	C	T	3034.77	606	57.55	1.65	4.516	481	124	605	Y	MT-2720	667.441	0.907945
2260220	NC_000962.3	C	T	2140.77	559	57.41	3.393	5.932	460	99	559	Y	MT-2174	619.613	0.902176
2260222	NC_000962.3	C	G	2471.77	618	56.36	0.454	36.624	498	117	615	S	MT-289	757.674	0.815654
2260222	NC_000962.3	C	G	2484.77	655	57.43	1.187	6.299	540	114	654	S	MT-1466	761.306	0.860364
2260222	NC_000962.3	C	G	1214.77	461	57.32	0.608	15.233	388	72	460	S	MT-6218	589.217	0.782394
2260222	NC_000962.3	C	G	1014.77	378	58.09	-0.304	2.544	320	57	377	S	MT-2665	424.731	0.889975
2260222	NC_000962.3	C	G	2895.77	606	57.55	0.201	4.508	483	123	606	S	MT-2720	667.441	0.907945
2260222	NC_000962.3	C	G	2484.77	642	56.84	0.38	15.972	526	116	642	S	MT-0972	783.34	0.819567
2260222	NC_000962.3	C	G	2316.77	602	57.62	1.439	2.478	493	108	601	S	MT-3271	654.699	0.919507
2260222	NC_000962.3	C	G	1762.77	535	57.14	-0.112	5.481	448	87	535	S	MT-3787	609.73	0.877438
2260222	NC_000962.3	C	G	1803.77	643	57.58	0.49	13.853	541	101	642	S	MT-4854	791.843	0.81203
2260222	NC_000962.3	C	G	2016.77	665	57.46	1.097	6.953	558	106	664	S	73787	778.122	0.854622
2260222	NC_000962.3	C	G	2265.77	571	57.25	1.993	11.132	464	105	569	S	MT-389	674.259	0.846856
2260222	NC_000962.3	C	G	2028.77	564	57.43	2.362	6.148	465	97	562	S	MT-2174	619.613	0.910246
2260222	NC_000962.3	C	G	3144.77	635	57.42	0.193	13.431	506	128	634	S	MT-3194	716.807	0.885873
2260222	NC_000962.3	C	G	1630.77	649	57.46	0.213	19.437	553	95	648	S	MT-567	777.127	0.835127
2260222	NC_000962.3	C	G	2483.77	532	56.08	0.889	21.788	416	114	530	S	MT-3255	645.747	0.823852
2260222	NC_000962.3	C	G	2826.77	660	57.91	-0.212	5.811	534	126	660	S	MT-1684	680.222	0.970271
2260222	NC_000962.3	C	G	2365.77	521	56.97	-0.031	12.31	418	102	520	S	78932	638.347	0.816171
2260222	NC_000962.3	C	G	1403.77	459	57.03	0.021	16.133	383	75	458	S	MT-6226	594.349	0.772274
2260222	NC_000962.3	C	G	2226.77	691	57.42	-0.642	11.803	577	114	691	S	MT-4166	780.291	0.885567
2260222	NC_000962.3	C	G	2095.77	553	57.77	-0.799	4.695	452	100	552	S	MT-2356	630.417	0.877197
2260222	NC_000962.3	C	G	4693.77	645	55.73	0.461	16.613	473	172	645	S	MT-578	721.183	0.894364
2260222	NC_000962.3	C	G	2494.77	566	56.67	1.756	10.969	455	111	566	S	MT-3673	674.031	0.839724
2260222	NC_000962.3	C	G	2419.77	646	57.7	0.942	1.604	535	110	645	S	MT-1103	724.505	0.891643
2260222	NC_000962.3	C	G	1400.77	614	58.11	-0.561	5.207	522	89	611	S	MT-5543	723.238	0.84896
2260222	NC_000962.3	C	G	3519.77	574	58.26	0.119	0	443	130	573	S	MT-2465	562.872	1.01977
2260222	NC_000962.3	C	G	2536.77	625	57.46	0.708	6.07	510	115	625	S	MT-504	665.023	0.939817
2260222	NC_000962.3	C	G	2642.77	712	56.6	-0.069	29.657	582	130	712	S	MT-0080	858.628	0.82923
2260222	NC_000962.3	C	G	3348.77	774	57.92	-0.145	3.395	625	148	773	S	MT-2473	793.868	0.974973
2260222	NC_000962.3	C	G	2183.77	749	57.08	-0.412	24.843	629	119	748	S	MT-0712	929.442	0.80586
2260222	NC_000962.3	C	G	1761.77	559	57	0.631	21.54	466	92	558	S	MT-5531	691.535	0.808347
2260222	NC_000962.3	C	G	2548.77	680	57.42	0.719	15.02	562	117	679	S	MT-1212	748.265	0.908769
2260222	NC_000962.3	C	G	2519.77	592	56.8	0.657	9.338	482	110	592	S	68995	710.925	0.832718
2260222	NC_000962.3	C	G	3461.77	666	56.99	-0.073	13.539	527	139	666	S	MT-1206	707.427	0.94144
2260222	NC_000962.3	C	G	2213.77	684	57.07	0.099	19.066	573	111	684	S	MT-1838	809.501	0.844965
2260222	NC_000962.3	C	G	2942.77	824	57.78	1.124	2.576	683	140	823	S	MT-0718	814.878	1.01119
2260222	NC_000962.3	C	G	2280.77	698	57.1	1.029	25.106	583	113	696	S	MT-2771	821.752	0.849405
2260222	NC_000962.3	C	G	1747.77	572	56.95	-0.092	30.42	477	93	570	S	MT-2800	672.144	0.851008
2260222	NC_000962.3	C	G	1902.77	470	56.48	0.805	23.41	374	95	469	S	MT-3173	585.845	0.80226
2260222	NC_000962.3	C	G	2116.77	644	56.94	0.39	21.054	533	109	642	S	MT-5983	804.62	0.800378
2260222	NC_000962.3	C	G	3100.77	686	57.38	1.3	3.37	551	134	685	S	MT-1393	744.375	0.921579
2260222	NC_000962.3	C	G	2515.77	650	57.33	0.398	7.727	531	117	648	S	MT-4942	684.058	0.950212
2260222	NC_000962.3	C	G	2232.77	532	57.27	1.905	4.695	432	99	531	S	MT-1549	632.614	0.840955
2260222	NC_000962.3	C	G	2263.77	676	57.88	0.49	3.551	559	114	673	S	MT-2667	686.693	0.984428
2260222	NC_000962.3	C	G	2049.77	631	57.69	1.39	5.09	524	107	631	S	MT-2175	708.086	0.891135
2260222	NC_000962.3	C	G	2440.77	647	57.67	-0.023	3.615	535	112	647	S	MT-1605	704.559	0.918305
2260222	NC_000962.3	C	G	2606.77	717	57.75	2.954	0.752	591	124	715	S	MT-5195	800.645	0.895528
2260222	NC_000962.3	C	G	2723.77	608	56.64	0.206	13.204	490	118	608	S	MT-5488	745.909	0.815113
2260222	NC_000962.3	C	G	1741.77	653	57.3	-0.185	13.183	555	97	652	S	MT-3683	804.958	0.811222
2260222	NC_000962.3	C	G	2777.77	680	57.41	-0.202	7.376	555	124	679	S	MT-2762	689.696	0.985942
2260222	NC_000962.3	C	G	1771.77	685	57.39	0.628	13.183	583	101	684	S	MT-3341	795.415	0.861186
2260222	NC_000962.3	C	G	2089.77	624	56.79	0.377	24.562	517	106	623	S	74856	795.746	0.78417
2260222	NC_000962.3	C	G	1680.77	698	57.32	0.341	20.859	596	100	696	S	MT-467	829.937	0.841028
2260222	NC_000962.3	C	G	2206.77	627	56.92	0.392	16.838	518	109	627	S	MT-2706	701.488	0.893814
2260222	NC_000962.3	C	G	1822.77	685	57.18	0.078	20.354	580	103	683	S	MT-405	809.576	0.846122
2260222	NC_000962.3	C	G	2132.77	509	57.49	-0.074	0.711	413	95	508	S	MT-6084	570.377	0.892392
2260222	NC_000962.3	C	G	2305.77	541	57.45	0.571	4.601	436	105	541	S	MT-2474	619.076	0.873883
2260222	NC_000962.3	C	G	1633.77	565	57.28	0.092	17.075	477	88	565	S	MT-6429	657.841	0.85887
2260222	NC_000962.3	C	G	3891.77	902	57.01	-0.813	17.766	730	170	900	S	MT-2151	952.498	0.946984
2260222	NC_000962.3	C	G	1907.77	644	56.99	0.486	20.408	540	102	642	S	MT-5383	810.086	0.794977
2260222	NC_000962.3	C	G	2519.77	623	57.59	0.121	6.07	509	114	623	S	MT-2184	678.348	0.918408
2260222	NC_000962.3	C	G	2586.77	668	57.94	0.596	2.539	549	116	665	S	MT-2769	687.439	0.971723
2260222	NC_000962.3	C	G	1895.77	576	57.91	-1.018	4.887	478	97	575	S	MT-1336	596.214	0.966096
2260231	NC_000962.3	T	C	3901.77	658	56.37	-5.124	13.267	503	154	657	Y	MT-578	721.183	0.91239
2260231	NC_000962.3	T	C	1665.77	747	57.53	-5.59	22.643	643	103	746	Y	MT-0712	929.442	0.803708
2260231	NC_000962.3	T	C	1446.77	581	58.33	-5.455	2.704	500	81	581	Y	MT-1336	596.214	0.974482
2260231	NC_000962.3	T	C	653.77	390	58.43	-3.376	5.511	341	49	390	Y	MT-2665	424.731	0.918228
2260231	NC_000962.3	T	C	2141.77	623	56.81	-4.41	34.448	513	108	621	Y	MT-289	757.674	0.822253
2260231	NC_000962.3	T	C	2050.77	648	57.69	-5.724	6.426	544	104	648	Y	MT-4942	684.058	0.947288
2260231	NC_000962.3	T	C	1867.77	638	57.18	-4.946	21.598	537	101	638	Y	MT-5983	804.62	0.792921
2260231	NC_000962.3	T	C	2893.77	798	58.28	-5.153	2.549	666	132	798	Y	MT-2473	793.868	1.0052
2260231	NC_000962.3	T	C	2403.77	836	58.15	-4.329	1.648	711	124	835	Y	MT-0718	814.878	1.02592
2260231	NC_000962.3	T	C	1875.77	549	57.67	-2.747	4.824	456	91	547	Y	MT-1549	632.614	0.867828
2260231	NC_000962.3	T	C	1945.77	554	57.75	-4.108	3.551	459	95	554	Y	MT-2474	619.076	0.894882
2260231	NC_000962.3	T	C	2762.77	590	58.6	-4.018	0	476	114	590	Y	MT-2465	562.872	1.0482
2260231	NC_000962.3	T	C	2170.77	727	58.04	-2.209	0	609	114	723	Y	MT-5195	800.645	0.908018
2260231	NC_000962.3	T	C	1170.77	574	57.63	-3.566	16.541	497	76	573	Y	MT-6429	657.841	0.872551
2260231	NC_000962.3	T	C	1535.77	629	57.48	-4.112	16.267	534	91	625	Y	MT-2706	701.488	0.896665
2260231	NC_000962.3	T	C	2840.77	908	57.48	-5.659	16.239	761	146	907	Y	MT-2151	952.498	0.953283
2260231	NC_000962.3	T	C	2003.77	661	58.02	-4.874	3.808	562	99	661	Y	MT-1605	704.559	0.938175
2260231	NC_000962.3	T	C	1966.77	534	57.43	-4.539	12.598	441	92	533	Y	78932	638.347	0.836536
2260231	NC_000962.3	T	C	1065.77	464	57.39	-3.969	15.386	396	67	463	Y	MT-6226	594.349	0.780686
2260231	NC_000962.3	T	C	1726.77	557	57.71	-3.106	5.062	468	88	556	Y	MT-2174	619.613	0.898948
2260231	NC_000962.3	T	C	2165.77	688	57.8	-5.157	16.1	582	105	687	Y	MT-1212	748.265	0.91946
2260231	NC_000962.3	T	C	2006.77	648	57.88	-3.903	8.369	548	100	648	Y	MT-504	665.023	0.974402
2260231	NC_000962.3	T	C	1938.77	646	57.93	-3.847	3.778	545	100	645	Y	MT-2175	708.086	0.912319
2260231	NC_000962.3	T	C	939.77	622	58.52	-4.341	4.324	547	74	621	Y	MT-5543	723.238	0.860021
2260231	NC_000962.3	T	C	1499.77	689	57.74	-2.869	9.112	591	96	687	Y	73787	778.122	0.885465
2260231	NC_000962.3	T	C	2386.77	609	57.98	-5.005	2.559	503	106	609	Y	MT-2720	667.441	0.91244
2260231	NC_000962.3	T	C	1376.77	657	58.06	-3.651	7.332	570	85	655	Y	MT-4854	791.843	0.82971
2260231	NC_000962.3	T	C	2071.77	661	57.72	-4.392	5.123	557	104	661	Y	MT-1466	761.306	0.868245
2260231	NC_000962.3	T	C	1726.77	515	57.98	-4.805	0	433	81	514	Y	MT-6084	570.377	0.902912
2260231	NC_000962.3	T	C	1955.77	734	57.25	-4.513	22.804	622	112	734	Y	MT-0080	858.628	0.854852
2260231	NC_000962.3	T	C	2412.77	678	58.14	-5.151	6.113	565	111	676	Y	MT-1684	680.222	0.996733
2260231	NC_000962.3	T	C	2122.77	572	57.05	-3.15	11.693	470	101	571	Y	MT-3673	674.031	0.848626
2260231	NC_000962.3	T	C	1957.77	619	57.87	-5.221	5.123	519	99	618	Y	MT-2184	678.348	0.912511
2260231	NC_000962.3	T	C	2008.77	593	57.57	-3.417	11.836	495	98	593	Y	MT-389	674.259	0.879484
2260231	NC_000962.3	T	C	1829.77	680	58.17	-4.193	2.697	582	98	680	Y	MT-2667	686.693	0.990253
2260231	NC_000962.3	T	C	2450.77	636	57.82	-5.251	9.085	526	110	636	Y	MT-3194	716.807	0.887268
2260231	NC_000962.3	T	C	1178.77	643	57.59	-3.73	16.701	558	84	642	Y	MT-5383	810.086	0.793743
2260231	NC_000962.3	T	C	1805.77	630	58.03	-3.287	3.825	533	96	629	Y	MT-3271	654.699	0.962274
2260231	NC_000962.3	T	C	1897.77	618	57.33	-3.835	8.566	519	98	617	Y	68995	710.925	0.86929
2260231	NC_000962.3	T	C	1027.77	685	57.87	-3.916	25.422	603	80	683	Y	MT-405	809.576	0.846122
2260231	NC_000962.3	T	C	984.77	656	58.05	-3.323	15.007	580	75	655	Y	MT-567	777.127	0.844135
2260231	NC_000962.3	T	C	1166.77	664	57.8	-3.992	8.041	580	83	663	Y	MT-3683	804.958	0.824888
2260231	NC_000962.3	T	C	1584.77	552	58.16	-5.155	2.577	465	86	551	Y	MT-2356	630.417	0.875611
2260231	NC_000962.3	T	C	2061.77	604	57.13	-4.192	9.95	499	103	602	Y	MT-5488	745.909	0.80975
2260231	NC_000962.3	T	C	1721.77	696	57.84	-5.867	8.698	596	99	695	Y	MT-4166	780.291	0.891975
2260231	NC_000962.3	T	C	947.77	679	57.89	-4.099	17.111	597	79	676	Y	MT-467	829.937	0.818134
2260231	NC_000962.3	T	C	2379.77	678	57.81	-4.435	1.544	561	115	676	Y	MT-1393	744.375	0.910831
2260231	NC_000962.3	T	C	1266.77	570	57.47	-4.551	23.733	489	80	569	Y	MT-2800	672.144	0.848033
2260231	NC_000962.3	T	C	1009.77	473	57.66	-3.095	13.537	409	64	473	Y	MT-6218	589.217	0.80276
2260231	NC_000962.3	T	C	1213.77	571	57.48	-3.783	21.109	490	80	570	Y	MT-5531	691.535	0.825699
2260231	NC_000962.3	T	C	1444.77	465	56.96	-3.74	24.935	381	83	464	Y	MT-3173	585.845	0.793725
2260231	NC_000962.3	T	C	1680.77	684	58.34	-3.653	2.842	589	95	684	Y	MT-2769	687.439	0.994997
2260231	NC_000962.3	T	C	1954.77	687	57.94	-4.677	6.546	584	102	686	Y	MT-2762	689.696	0.996091
2260231	NC_000962.3	T	C	1769.77	703	57.5	-4.146	20.907	601	102	703	Y	MT-2771	821.752	0.855489
2260231	NC_000962.3	T	C	1405.77	679	57.65	-4.367	21.136	585	92	677	Y	MT-1838	809.501	0.838788
2260231	NC_000962.3	T	C	2148.77	526	56.59	-3.382	19.737	426	100	526	Y	MT-3255	645.747	0.81456
2260231	NC_000962.3	T	C	1767.77	652	58.19	-3.854	1.708	558	94	652	Y	MT-1103	724.505	0.899925
2260231	NC_000962.3	T	C	2803.77	667	57.43	-4.86	12.545	540	123	663	Y	MT-1206	707.427	0.942853
2260231	NC_000962.3	T	C	1410.77	619	57.47	-3.922	16.371	532	87	619	Y	74856	795.746	0.777886
2260231	NC_000962.3	T	C	1259.77	687	57.8	-4.572	9.727	600	87	687	Y	MT-3341	795.415	0.8637
2260231	NC_000962.3	T	C	1346.77	537	57.6	-4.211	7.407	461	75	536	Y	MT-3787	609.73	0.880718
2260231	NC_000962.3	T	C	1903.77	649	57.31	-4.499	12.488	548	101	649	Y	MT-0972	783.34	0.828504
2266508	NC_000962.3	A	T	6060.77	837	59.95	8.567	50.627	621	213	834	W	MT-2800	672.144	1.24527
2266508	NC_000962.3	A	T	7547.77	989	59.98	8.829	48.439	721	267	988	W	MT-0972	783.34	1.26254
2266508	NC_000962.3	A	T	7761.77	874	60	6.964	17.767	615	257	872	W	68995	710.925	1.22938
2266508	NC_000962.3	A	T	9270.77	948	59.98	7.649	33.764	639	308	947	W	MT-2356	630.417	1.50377
2266508	NC_000962.3	A	T	12131.8	1100	59.97	9.047	26.296	714	383	1097	W	MT-1103	724.505	1.51828
2266508	NC_000962.3	A	T	11231.8	1081	59.92	8.794	38.046	703	372	1075	W	MT-2184	678.348	1.59358
2266508	NC_000962.3	A	T	11624.8	1053	59.96	8.844	28.276	680	368	1048	W	MT-389	674.259	1.56171
2266508	NC_000962.3	A	T	7532.77	806	59.98	9.014	39.945	560	246	806	W	MT-3787	609.73	1.3219
2266508	NC_000962.3	A	T	5539.77	940	59.95	7.01	25.611	732	206	938	W	MT-2771	821.752	1.1439
2266508	NC_000962.3	A	T	15655.8	1271	59.96	9.405	11.158	774	492	1266	W	MT-2473	793.868	1.60102
2266508	NC_000962.3	A	T	9567.77	935	59.98	9.524	24.365	618	315	933	W	MT-2474	619.076	1.51032
2266508	NC_000962.3	A	T	11667.8	1186	59.88	9.963	27.128	796	386	1182	W	MT-4166	780.291	1.51995
2266508	NC_000962.3	A	T	11507.8	1080	59.96	8.441	24.074	694	386	1080	W	MT-2175	708.086	1.52524
2266508	NC_000962.3	A	T	7610.77	1101	59.94	9.439	27.626	821	279	1100	W	MT-4854	791.843	1.39043
2266508	NC_000962.3	A	T	9109.77	990	59.94	7.686	25.893	678	307	985	W	MT-1549	632.614	1.56494
2266508	NC_000962.3	A	T	11684.8	1144	59.86	8.185	27.421	757	383	1140	W	MT-1206	707.427	1.61713
2266508	NC_000962.3	A	T	11475.8	1071	59.91	7.658	18.056	694	372	1066	W	MT-2720	667.441	1.60464
2266508	NC_000962.3	A	T	10169.8	1027	59.93	9.514	26.414	691	335	1026	W	MT-2174	619.613	1.65749
2266508	NC_000962.3	A	T	11203.8	1031	59.98	10.017	19.865	666	361	1027	W	MT-504	665.023	1.55032
2266508	NC_000962.3	A	T	6714.77	866	59.98	7.393	32.697	631	232	863	W	MT-5488	745.909	1.161
2266508	NC_000962.3	A	T	10304.8	963	59.96	9.466	16.534	634	327	961	W	MT-578	721.183	1.33531
2266508	NC_000962.3	A	T	6569.77	1009	59.98	8.397	44.207	768	239	1007	W	MT-405	809.576	1.24633
2266508	NC_000962.3	A	T	6351.77	605	59.83	6.311	17.835	392	211	603	W	MT-2665	424.731	1.42443
2266508	NC_000962.3	A	T	7175.77	913	59.95	8.782	41.459	661	250	911	W	MT-289	757.674	1.205
2266508	NC_000962.3	A	T	6860.77	1032	59.96	8.741	34.274	779	250	1029	W	MT-467	829.937	1.24347
2266508	NC_000962.3	A	T	14255.8	1348	59.95	9.908	28.379	882	460	1342	W	MT-0718	814.878	1.65424
2266508	NC_000962.3	A	T	8504.77	1073	59.97	9.029	25.433	770	299	1069	W	MT-1466	761.306	1.40942
2266508	NC_000962.3	A	T	11217.8	1018	59.97	8.549	29.052	655	361	1016	W	MT-3271	654.699	1.55491
2266508	NC_000962.3	A	T	3246.77	661	59.94	7.392	36.561	528	131	659	W	MT-6226	594.349	1.11214
2266508	NC_000962.3	A	T	11668.8	1123	59.9	7.369	16.616	736	382	1118	W	MT-2762	689.696	1.62825
2266508	NC_000962.3	A	T	6946.77	887	59.97	9.625	43.328	647	237	884	W	MT-2706	701.488	1.26446
2266508	NC_000962.3	A	T	11819.8	1078	59.94	9.201	26.105	700	376	1076	W	MT-5543	723.238	1.49052
2266508	NC_000962.3	A	T	7893.77	982	59.97	8.644	29.502	711	270	981	W	MT-1838	809.501	1.21309
2266508	NC_000962.3	A	T	7259.77	818	59.98	8.909	36.767	567	247	814	W	78932	638.347	1.28143
2266508	NC_000962.3	A	T	14910.8	1366	59.96	10.214	24.256	879	481	1360	W	MT-2151	952.498	1.43412
2266508	NC_000962.3	A	T	13214.8	1179	59.94	9.66	22.13	747	428	1175	W	MT-1605	704.559	1.67339
2266508	NC_000962.3	A	T	6974.77	913	59.98	7.765	28.005	670	242	912	W	MT-3673	674.031	1.35454
2266508	NC_000962.3	A	T	10065.8	1063	59.93	9.253	17.285	727	333	1060	W	MT-4942	684.058	1.55396
2266508	NC_000962.3	A	T	5954.77	840	59.96	7.834	54.326	624	213	837	W	MT-5531	691.535	1.21469
2266508	NC_000962.3	A	T	7975.77	1088	59.95	10.062	52.508	809	277	1086	W	MT-0712	929.442	1.17059
2266508	NC_000962.3	A	T	8117.77	1027	60	8.507	47.497	744	282	1026	W	MT-0080	858.628	1.19609
2266508	NC_000962.3	A	T	12404.8	1173	59.89	7.21	28.804	772	399	1171	W	MT-1212	748.265	1.56763
2266508	NC_000962.3	A	T	11781.8	1109	59.93	9.055	10.201	727	378	1105	W	MT-2667	686.693	1.61499
2266508	NC_000962.3	A	T	8692.77	1022	59.97	8.889	28.847	727	289	1016	W	MT-3683	804.958	1.26963
2266508	NC_000962.3	A	T	10516.8	962	59.99	8.723	24.256	620	337	957	W	MT-6084	570.377	1.6866
2266508	NC_000962.3	A	T	12658.8	1106	59.96	7.179	14.674	697	406	1103	W	MT-2769	687.439	1.60887
2266508	NC_000962.3	A	T	6584.77	987	59.93	9.269	45.844	750	234	984	W	MT-5983	804.62	1.22667
2266508	NC_000962.3	A	T	9863.77	1057	59.94	8.634	22.982	723	332	1055	W	MT-1393	744.375	1.41998
2266508	NC_000962.3	A	T	8330.77	1014	59.97	8.472	43.778	732	280	1012	W	MT-567	777.127	1.30481
2266508	NC_000962.3	A	T	9300.77	1136	59.97	8.063	19.753	811	320	1131	W	MT-5195	800.645	1.41886
2266508	NC_000962.3	A	T	8535.77	910	59.98	7.478	39.892	626	281	907	W	73787	778.122	1.16948
2266508	NC_000962.3	A	T	7948.77	956	59.95	7.051	51.897	687	269	956	W	74856	795.746	1.20139
2266508	NC_000962.3	A	T	12383.8	1104	59.96	8.607	19.743	699	402	1101	W	MT-3194	716.807	1.54016
2266508	NC_000962.3	A	T	4938.77	722	59.94	6.939	44.365	544	178	722	W	MT-6429	657.841	1.09753
2266508	NC_000962.3	A	T	5534.77	676	59.99	5.991	24.786	484	191	675	W	MT-6218	589.217	1.14729
2266508	NC_000962.3	A	T	7210.77	1006	59.91	8.173	33.451	742	260	1002	W	MT-3341	795.415	1.26475
2266508	NC_000962.3	A	T	4287.77	682	59.92	8.096	44.621	517	161	678	W	MT-3173	585.845	1.16413
2266508	NC_000962.3	A	T	12173.8	1089	60	9.511	14.1	673	409	1082	W	MT-1684	680.222	1.60095
2266508	NC_000962.3	A	T	5656.77	756	59.97	6.376	35.733	554	200	754	W	MT-3255	645.747	1.17074
2266508	NC_000962.3	A	T	10932.8	929	59.97	7.803	1.146	570	354	924	W	MT-2465	562.872	1.65046
2266508	NC_000962.3	A	T	12361.8	1003	59.98	8.264	23.211	612	388	1000	W	MT-1336	596.214	1.68228
2266508	NC_000962.3	A	T	7020.77	1011	59.97	7.826	41.46	759	248	1007	W	MT-5383	810.086	1.24802
2266517	NC_000962.3	T	C	8420.77	1108	59.97	6.944	24.274	799	306	1105	Y	MT-4854	791.843	1.39927
2266517	NC_000962.3	T	C	10299.8	1150	59.97	5.547	17.023	790	357	1147	Y	MT-5195	800.645	1.43634
2266517	NC_000962.3	T	C	10208.8	1013	59.98	5.384	19.978	663	350	1013	Y	MT-1549	632.614	1.60129
2266517	NC_000962.3	T	C	14218.8	1209	59.97	7.286	21.418	741	467	1208	Y	MT-1605	704.559	1.71597
2266517	NC_000962.3	T	C	11021.8	1044	59.96	5.643	23.596	665	377	1042	Y	MT-2174	619.613	1.68492
2266517	NC_000962.3	T	C	12769.8	1103	59.95	6.39	25.479	688	413	1101	Y	MT-5543	723.238	1.52509
2266517	NC_000962.3	T	C	8399.77	1104	59.97	7.248	44.341	804	299	1103	Y	MT-0712	929.442	1.18781
2266517	NC_000962.3	T	C	11447.8	981	60.03	5.743	19.445	604	376	980	Y	MT-6084	570.377	1.71992
2266517	NC_000962.3	T	C	5889.77	937	59.97	5.204	20.083	711	225	936	Y	MT-2771	821.752	1.14025
2266517	NC_000962.3	T	C	13487.8	1193	59.9	5.55	21.988	751	441	1192	Y	MT-1212	748.265	1.59435
2266517	NC_000962.3	T	C	13144.8	1025	60.01	6.416	22.816	599	426	1025	Y	MT-1336	596.214	1.71918
2266517	NC_000962.3	T	C	8192.77	896	60.01	5.513	12.349	619	276	895	Y	68995	710.925	1.26033
2266517	NC_000962.3	T	C	12890.8	1133	59.94	6.363	11.255	711	420	1131	Y	MT-2667	686.693	1.64994
2266517	NC_000962.3	T	C	6185.77	765	60	3.96	28.968	547	217	764	Y	MT-3255	645.747	1.18467
2266517	NC_000962.3	T	C	7564.77	929	59.99	6.29	27.022	663	263	926	Y	MT-3673	674.031	1.37827
2266517	NC_000962.3	T	C	12914.8	1178	59.88	5.826	30.548	755	423	1178	Y	MT-1206	707.427	1.66519
2266517	NC_000962.3	T	C	10950.8	1062	59.96	5.129	19.978	693	368	1061	Y	MT-1393	744.375	1.4267
2266517	NC_000962.3	T	C	9177.77	1030	60.01	7.266	21.733	719	309	1028	Y	MT-3683	804.958	1.27957
2266517	NC_000962.3	T	C	8169.77	831	60.02	6.426	30.302	560	270	830	Y	MT-3787	609.73	1.3629
2266517	NC_000962.3	T	C	7611.77	1042	59.97	6.157	33.115	766	275	1041	Y	MT-467	829.937	1.25552
2266517	NC_000962.3	T	C	16880.8	1320	60	5.705	8.422	765	555	1320	Y	MT-2473	793.868	1.66274
2266517	NC_000962.3	T	C	13419.8	1122	59.98	5.486	17.278	683	439	1122	Y	MT-3194	716.807	1.56527
2266517	NC_000962.3	T	C	11813.8	985	60	6.488	1.126	581	404	985	Y	MT-2465	562.872	1.74995
2266517	NC_000962.3	T	C	7993.77	1020	59.96	5.559	29.502	734	285	1019	Y	MT-3341	795.415	1.28235
2266517	NC_000962.3	T	C	12619.8	1083	59.99	6.461	31.355	673	409	1082	Y	MT-389	674.259	1.60621
2266517	NC_000962.3	T	C	8744.77	1049	60.05	5.262	40.064	739	310	1049	Y	MT-0080	858.628	1.22172
2266517	NC_000962.3	T	C	12814.8	1110	59.92	3.989	29.684	679	429	1108	Y	MT-2184	678.348	1.63633
2266517	NC_000962.3	T	C	3626.77	670	60	4.383	31.128	524	145	669	Y	MT-6226	594.349	1.12728
2266517	NC_000962.3	T	C	12594.8	1105	60	7.118	21.367	688	416	1104	Y	MT-2175	708.086	1.56054
2266517	NC_000962.3	T	C	12935.8	1199	59.91	7.144	21.587	771	427	1198	Y	MT-4166	780.291	1.53661
2266517	NC_000962.3	T	C	13569.8	1078	60.03	7.169	13.697	624	452	1076	Y	MT-1684	680.222	1.58478
2266517	NC_000962.3	T	C	7042.77	896	60	6.563	24.914	647	249	896	Y	MT-5488	745.909	1.20122
2266517	NC_000962.3	T	C	11899.8	1018	60	4.644	25.829	621	396	1017	Y	MT-3271	654.699	1.55491
2266517	NC_000962.3	T	C	6536.77	846	60.02	6.467	36.216	610	236	846	Y	MT-2800	672.144	1.25866
2266517	NC_000962.3	T	C	7750.77	1003	59.98	5.25	38.659	728	273	1001	Y	MT-5383	810.086	1.23814
2266517	NC_000962.3	T	C	7065.77	1019	60	6.273	40.534	761	255	1016	Y	MT-405	809.576	1.25868
2266517	NC_000962.3	T	C	5249.77	742	60.01	3.756	27.755	545	196	741	Y	MT-6429	657.841	1.12793
2266517	NC_000962.3	T	C	6810.77	1000	59.95	6.677	36.211	742	256	998	Y	MT-5983	804.62	1.24282
2266517	NC_000962.3	T	C	12637.8	1115	59.99	7.1	25.655	702	412	1114	Y	MT-1103	724.505	1.53898
2266517	NC_000962.3	T	C	7206.77	881	60.02	7.654	35.98	628	253	881	Y	MT-2706	701.488	1.2559
2266517	NC_000962.3	T	C	12757.8	1094	59.92	4.838	17.445	676	417	1093	Y	MT-2720	667.441	1.6391
2266517	NC_000962.3	T	C	8275.77	982	60.05	6.052	36.878	691	290	981	Y	MT-0972	783.34	1.25361
2266517	NC_000962.3	T	C	9063.77	1023	60.04	5.816	35.668	714	309	1023	Y	MT-567	777.127	1.31639
2266517	NC_000962.3	T	C	8623.77	989	60.04	6.591	23.647	692	294	986	Y	MT-1838	809.501	1.22174
2266517	NC_000962.3	T	C	10335.8	944	60.01	6.176	18.012	600	344	944	Y	MT-2474	619.076	1.52485
2266517	NC_000962.3	T	C	16394.8	1385	60.01	7.449	23.648	859	526	1385	Y	MT-2151	952.498	1.45407
2266517	NC_000962.3	T	C	12198.8	1056	60.02	7.346	14.296	659	394	1053	Y	MT-504	665.023	1.58791
2266517	NC_000962.3	T	C	6787.77	617	59.88	4.563	17.592	388	229	617	Y	MT-2665	424.731	1.45268
2266517	NC_000962.3	T	C	11238.8	1081	59.98	5.695	13.461	708	373	1081	Y	MT-4942	684.058	1.58028
2266517	NC_000962.3	T	C	15645.8	1372	60.01	7.516	27.069	857	515	1372	Y	MT-0718	814.878	1.68369
2266517	NC_000962.3	T	C	8340.77	980	59.96	3.893	48.884	689	291	980	Y	74856	795.746	1.23155
2266517	NC_000962.3	T	C	5959.77	685	60.04	3.722	25.154	470	215	685	Y	MT-6218	589.217	1.16256
2266517	NC_000962.3	T	C	10986.8	1015	60	7.504	11.38	649	366	1015	Y	MT-578	721.183	1.40741
2266517	NC_000962.3	T	C	12776.8	1141	59.92	6.081	14.263	722	418	1140	Y	MT-2762	689.696	1.65435
2266517	NC_000962.3	T	C	7544.77	923	59.93	6.776	29.238	657	264	921	Y	MT-289	757.674	1.2182
2266517	NC_000962.3	T	C	9071.77	956	60.03	5.481	31.058	642	312	954	Y	73787	778.122	1.2286
2266517	NC_000962.3	T	C	13216.8	1127	59.98	5.158	12.728	681	441	1122	Y	MT-2769	687.439	1.63942
2266517	NC_000962.3	T	C	4790.77	677	59.95	4.829	39.038	493	184	677	Y	MT-3173	585.845	1.1556
2266517	NC_000962.3	T	C	8215.77	830	59.99	4.518	29.542	548	280	828	Y	78932	638.347	1.30023
2266517	NC_000962.3	T	C	9165.77	1104	59.99	5.89	22.279	774	328	1102	Y	MT-1466	761.306	1.45014
2266517	NC_000962.3	T	C	9963.77	969	59.99	6.106	33.003	631	337	968	Y	MT-2356	630.417	1.53708
2266517	NC_000962.3	T	C	6343.77	850	59.98	5.156	45.441	618	229	847	Y	MT-5531	691.535	1.22915
2266550	NC_000962.3	G	T	9271.77	1135	59.96	-1.334	6.82	806	327	1133	K	MT-0712	929.442	1.22116
2266550	NC_000962.3	G	T	10311.8	1082	60.04	-0.043	4.471	730	352	1082	K	MT-0080	858.628	1.26015
2266550	NC_000962.3	G	T	14677.8	1109	60.03	-0.879	1.757	625	482	1107	K	MT-504	665.023	1.66761
2266550	NC_000962.3	G	T	13791.8	1044	59.98	0.769	2.473	592	451	1043	K	MT-3271	654.699	1.59463
2266550	NC_000962.3	G	T	7848.77	902	59.93	-0.906	1.216	633	269	902	K	MT-289	757.674	1.19049
2266550	NC_000962.3	G	T	7550.77	862	59.96	-0.676	12.025	602	260	862	K	MT-5531	691.535	1.2465
2266550	NC_000962.3	G	T	21225.8	1470	60	-0.078	0.524	759	710	1469	K	MT-2473	793.868	1.85169
2266550	NC_000962.3	G	T	8989.77	996	59.96	-0.269	2.706	695	301	996	K	MT-5383	810.086	1.2295
2266550	NC_000962.3	G	T	14380.8	1111	60.01	0.056	1.115	639	472	1111	K	MT-578	721.183	1.54052
2266550	NC_000962.3	G	T	15888.8	1242	59.89	-0.216	6.042	720	522	1242	K	MT-4166	780.291	1.59171
2266550	NC_000962.3	G	T	15329.8	1186	59.9	0.933	0.526	675	511	1186	K	MT-5543	723.238	1.63985
2266550	NC_000962.3	G	T	7576.77	846	59.99	-0.973	1.92	585	260	845	K	MT-2706	701.488	1.20601
2266550	NC_000962.3	G	T	13760.8	1012	59.99	0.136	0	551	460	1011	K	MT-2474	619.076	1.63469
2266550	NC_000962.3	G	T	5296.77	634	59.91	-0.979	2.762	446	188	634	K	MT-3173	585.845	1.0822
2266550	NC_000962.3	G	T	15797.8	1263	59.89	0.842	6.014	739	524	1263	K	MT-1206	707.427	1.78534
2266550	NC_000962.3	G	T	15626.8	1178	59.98	0.749	1.101	651	527	1178	K	MT-3194	716.807	1.6434
2266550	NC_000962.3	G	T	6908.77	910	59.94	1.16	0.594	664	246	910	K	MT-2771	821.752	1.10739
2266550	NC_000962.3	G	T	15075.8	1046	60	-0.618	5.888	533	512	1045	K	MT-2465	562.872	1.85833
2266550	NC_000962.3	G	T	6449.77	762	60.01	0.122	0	531	231	762	K	MT-6429	657.841	1.15833
2266550	NC_000962.3	G	T	14610.8	1143	59.88	1.982	1.758	652	490	1142	K	MT-2184	678.348	1.68498
2266550	NC_000962.3	G	T	16152.8	1181	59.91	1.224	4.943	639	541	1180	K	MT-2720	667.441	1.76944
2266550	NC_000962.3	G	T	10139.8	931	60.01	0.729	0.548	595	336	931	K	68995	710.925	1.30956
2266550	NC_000962.3	G	T	15221.8	1197	59.89	2.01	1.117	696	499	1195	K	MT-2762	689.696	1.73555
2266550	NC_000962.3	G	T	14249.8	1142	60.01	-0.501	3.239	668	473	1141	K	MT-1103	724.505	1.57625
2266550	NC_000962.3	G	T	6471.77	768	59.99	0.234	2.702	540	227	767	K	MT-3255	645.747	1.18932
2266550	NC_000962.3	G	T	9002.77	659	59.8	0.697	3.22	367	292	659	K	MT-2665	424.731	1.55157
2266550	NC_000962.3	G	T	12665.8	1067	59.97	0.812	4.135	637	430	1067	K	MT-1549	632.614	1.68665
2266550	NC_000962.3	G	T	14108.8	1068	59.94	-0.173	2.464	609	458	1067	K	MT-389	674.259	1.58396
2266550	NC_000962.3	G	T	4515.77	658	59.98	-0.326	1.288	488	168	656	K	MT-6226	594.349	1.10709
2266550	NC_000962.3	G	T	7087.77	922	59.92	-1.877	2.786	657	261	918	K	MT-5983	804.62	1.14588
2266550	NC_000962.3	G	T	9166.77	997	59.94	0.344	1.899	685	312	997	K	MT-3341	795.415	1.25343
2266550	NC_000962.3	G	T	18086.8	1286	59.94	0.14	3.188	699	587	1286	K	MT-1605	704.559	1.82526
2266550	NC_000962.3	G	T	12945.8	1036	59.97	0.836	5.982	595	438	1033	K	MT-2356	630.417	1.64336
2266550	NC_000962.3	G	T	10422.8	962	60.03	-0.094	0	614	348	962	K	73787	778.122	1.23631
2266550	NC_000962.3	G	T	8291.77	1025	59.93	-1.583	1.208	717	307	1024	K	MT-467	829.937	1.23503
2266550	NC_000962.3	G	T	13998.8	1003	60	-0.612	4.082	548	455	1003	K	MT-6084	570.377	1.75849
2266550	NC_000962.3	G	T	10016.8	1001	59.93	0.012	0.559	668	330	998	K	MT-3683	804.958	1.24354
2266550	NC_000962.3	G	T	16755.8	1230	59.93	-0.422	4.965	682	547	1229	K	MT-2667	686.693	1.79119
2266550	NC_000962.3	G	T	17597.8	1326	59.91	1.383	1.762	747	577	1324	K	MT-1212	748.265	1.7721
2266550	NC_000962.3	G	T	17573.8	1272	59.99	1.231	1.104	692	578	1270	K	MT-2769	687.439	1.85035
2266550	NC_000962.3	G	T	9652.77	1029	60.04	0.311	1.848	686	342	1028	K	MT-567	777.127	1.32411
2266550	NC_000962.3	G	T	15042.8	1048	59.98	1.776	8.1	562	486	1048	K	MT-1336	596.214	1.75776
2266550	NC_000962.3	G	T	8239.77	717	59.97	0.834	3.337	444	272	716	K	MT-6218	589.217	1.21687
2266550	NC_000962.3	G	T	9747.77	927	59.98	-1.542	0.548	601	326	927	K	MT-3673	674.031	1.37531
2266550	NC_000962.3	G	T	10068.8	1120	59.96	0.536	1.877	759	359	1118	K	MT-4854	791.843	1.41442
2266550	NC_000962.3	G	T	13720.8	1150	59.98	0.491	5.114	696	453	1149	K	MT-4942	684.058	1.68114
2266550	NC_000962.3	G	T	7836.77	835	59.97	-1.569	2.706	572	263	835	K	MT-2800	672.144	1.24229
2266550	NC_000962.3	G	T	11171.8	1168	59.96	-0.268	1.843	770	398	1168	K	MT-1466	761.306	1.53421
2266550	NC_000962.3	G	T	9321.77	927	59.99	0.611	0.547	611	314	925	K	MT-5488	745.909	1.24278
2266550	NC_000962.3	G	T	13156.8	1115	59.94	0.025	1.124	676	439	1115	K	MT-1393	744.375	1.4979
2266550	NC_000962.3	G	T	8977.77	972	60.04	0.893	0.559	665	307	972	K	MT-1838	809.501	1.20074
2266550	NC_000962.3	G	T	12587.8	1204	59.96	0.032	1.802	769	435	1204	K	MT-5195	800.645	1.50379
2266550	NC_000962.3	G	T	8472.77	989	59.96	-0.41	7.859	684	304	988	K	74856	795.746	1.24286
2266550	NC_000962.3	G	T	17031.8	1117	60	2.155	1.729	577	540	1117	K	MT-1684	680.222	1.64211
2266550	NC_000962.3	G	T	8409.77	997	60.01	-0.676	4.602	706	291	997	K	MT-405	809.576	1.23151
2266550	NC_000962.3	G	T	9545.77	1016	60.04	0.616	5.468	691	324	1015	K	MT-0972	783.34	1.29701
2266550	NC_000962.3	G	T	8946.77	842	59.99	-0.207	1.155	536	306	842	K	78932	638.347	1.31903
2266550	NC_000962.3	G	T	13781.8	1078	59.94	-0.047	2.478	627	451	1078	K	MT-2174	619.613	1.7398
2266550	NC_000962.3	G	T	16332.8	1172	59.93	0.009	1.108	647	525	1172	K	MT-2175	708.086	1.65517
2266550	NC_000962.3	G	T	19080.8	1409	60.01	0.822	4.077	800	609	1409	K	MT-2151	952.498	1.47927
2266550	NC_000962.3	G	T	9785.77	841	59.97	-1.507	6.223	525	315	840	K	MT-3787	609.73	1.3793
2266550	NC_000962.3	G	T	18487.8	1398	59.98	-0.262	4.086	781	617	1398	K	MT-0718	814.878	1.71559
2266553	NC_000962.3	C	G	15210.8	1168	59.98	1.947	0.522	648	511	1159	S	MT-3194	716.807	1.62945
2266553	NC_000962.3	C	G	8369.77	999	60.01	-0.909	1.946	704	295	999	S	MT-405	809.576	1.23398
2266553	NC_000962.3	C	G	9947.77	1034	60.04	0.642	0.55	687	343	1030	S	MT-567	777.127	1.33054
2266553	NC_000962.3	C	G	9362.77	1017	60.04	0.536	2.644	689	325	1014	S	MT-0972	783.34	1.29829
2266553	NC_000962.3	C	G	6214.77	758	60.01	0.7	2.702	527	229	756	S	MT-6429	657.841	1.15225
2266553	NC_000962.3	C	G	14234.8	1120	60.01	0.372	0.529	647	471	1118	S	MT-578	721.183	1.553
2266553	NC_000962.3	C	G	13735.8	1124	60.01	0.007	0.529	654	458	1112	S	MT-1103	724.505	1.5514
2266553	NC_000962.3	C	G	13515.8	1156	59.98	1.036	2.512	691	455	1146	S	MT-4942	684.058	1.68992
2266553	NC_000962.3	C	G	7398.77	840	59.99	-0.795	0.572	582	254	836	S	MT-2706	701.488	1.19745
2266553	NC_000962.3	C	G	17101.8	1261	59.99	1.463	0.524	678	573	1251	S	MT-2769	687.439	1.83434
2266553	NC_000962.3	C	G	10092.8	961	60.03	0.603	1.852	617	343	960	S	73787	778.122	1.23502
2266553	NC_000962.3	C	G	12929.8	1215	59.96	0.024	0	763	443	1206	S	MT-5195	800.645	1.51753
2266553	NC_000962.3	C	G	6565.77	919	59.94	1.863	2.032	673	243	916	S	MT-2771	821.752	1.11834
2266553	NC_000962.3	C	G	14046.8	1014	60	-0.184	2.432	547	460	1007	S	MT-6084	570.377	1.77777
2266553	NC_000962.3	C	G	12545.8	1060	59.97	0.151	1.756	621	435	1056	S	MT-1549	632.614	1.67559
2266553	NC_000962.3	C	G	16484.8	1097	60	2.917	1.094	566	524	1090	S	MT-1684	680.222	1.61271
2266553	NC_000962.3	C	G	13735.8	1025	59.99	0.44	0.523	554	465	1019	S	MT-2474	619.076	1.65569
2266553	NC_000962.3	C	G	8906.77	973	60.04	0.508	0	662	308	970	S	MT-1838	809.501	1.20198
2266553	NC_000962.3	C	G	15568.8	1216	59.89	-0.691	3.227	692	515	1207	S	MT-4166	780.291	1.55839
2266553	NC_000962.3	C	G	7591.77	843	59.97	-0.59	1.193	582	260	842	S	MT-2800	672.144	1.2542
2266553	NC_000962.3	C	G	7812.77	900	59.93	-0.86	0	627	270	897	S	MT-289	757.674	1.18785
2266553	NC_000962.3	C	G	14012.8	1086	59.94	0.268	0	627	455	1082	S	MT-2174	619.613	1.75271
2266553	NC_000962.3	C	G	14894.8	1176	59.9	1.478	0	666	497	1163	S	MT-5543	723.238	1.62602
2266553	NC_000962.3	C	G	9737.77	840	59.97	-1.299	2.576	525	314	839	S	MT-3787	609.73	1.37766
2266553	NC_000962.3	C	G	6216.77	760	59.99	0.912	0.574	538	218	756	S	MT-3255	645.747	1.17693
2266553	NC_000962.3	C	G	15567.8	1264	59.89	1.218	5.045	730	522	1252	S	MT-1206	707.427	1.78676
2266553	NC_000962.3	C	G	8346.77	1032	59.93	-1.236	0	724	306	1030	S	MT-467	829.937	1.24347
2266553	NC_000962.3	C	G	11221.8	1182	59.96	-0.07	0	764	406	1170	S	MT-1466	761.306	1.5526
2266553	NC_000962.3	C	G	10105.8	1121	59.96	0.65	1.174	753	358	1111	S	MT-4854	791.843	1.41568
2266553	NC_000962.3	C	G	14656.8	1145	59.88	1.899	1.108	645	497	1142	S	MT-2184	678.348	1.68792
2266553	NC_000962.3	C	G	8922.77	845	59.99	0.441	0.542	539	304	843	S	78932	638.347	1.32373
2266553	NC_000962.3	C	G	17847.8	1292	59.95	0.561	1.109	696	587	1283	S	MT-1605	704.559	1.83377
2266553	NC_000962.3	C	G	16065.8	1173	59.91	1.873	4.067	628	535	1163	S	MT-2720	667.441	1.75746
2266553	NC_000962.3	C	G	20979.8	1475	60	0.741	0	757	709	1466	S	MT-2473	793.868	1.85799
2266553	NC_000962.3	C	G	7320.77	846	59.96	-0.281	9.227	590	254	844	S	MT-5531	691.535	1.22337
2266553	NC_000962.3	C	G	7983.77	981	59.96	0.905	5.577	687	292	979	S	74856	795.746	1.23281
2266553	NC_000962.3	C	G	9244.77	925	59.99	0.785	0.553	610	314	924	S	MT-5488	745.909	1.2401
2266553	NC_000962.3	C	G	9296.77	917	59.98	-0.659	0	595	318	913	S	MT-3673	674.031	1.36047
2266553	NC_000962.3	C	G	14995.8	1054	60	-0.615	4.978	535	517	1052	S	MT-2465	562.872	1.87254
2266553	NC_000962.3	C	G	18725.8	1402	60.01	1.149	3.258	797	601	1398	S	MT-2151	952.498	1.47192
2266553	NC_000962.3	C	G	18518.8	1407	59.98	-0.449	1.108	774	624	1398	S	MT-0718	814.878	1.72664
2266553	NC_000962.3	C	G	15996.8	1177	59.93	1.028	0.524	646	520	1166	S	MT-2175	708.086	1.66223
2266553	NC_000962.3	C	G	9356.77	999	59.93	-0.22	0	666	332	998	S	MT-3683	804.958	1.24106
2266553	NC_000962.3	C	G	4814.77	632	59.91	-0.07	1.231	445	183	628	S	MT-3173	585.845	1.07878
2266553	NC_000962.3	C	G	13109.8	1116	59.94	0.518	0	674	439	1113	S	MT-1393	744.375	1.49924
2266553	NC_000962.3	C	G	7869.77	715	59.97	1.05	1.817	443	270	713	S	MT-6218	589.217	1.21347
2266553	NC_000962.3	C	G	13501.8	1063	59.94	0.088	2.481	606	453	1059	S	MT-389	674.259	1.57655
2266553	NC_000962.3	C	G	4399.77	668	59.98	0.191	0	498	169	667	S	MT-6226	594.349	1.12392
2266553	NC_000962.3	C	G	16785.8	1326	59.91	1.217	1.112	741	578	1319	S	MT-1212	748.265	1.7721
2266553	NC_000962.3	C	G	8743.77	986	59.93	0.212	0.564	674	310	984	S	MT-3341	795.415	1.2396
2266553	NC_000962.3	C	G	6817.77	923	59.92	-0.861	1.973	667	254	921	S	MT-5983	804.62	1.14713
2266553	NC_000962.3	C	G	14708.8	1120	60.03	-0.979	0.52	620	491	1111	S	MT-504	665.023	1.68415
2266553	NC_000962.3	C	G	13770.8	1062	59.98	0.995	1.744	599	456	1055	S	MT-3271	654.699	1.62212
2266553	NC_000962.3	C	G	10073.8	1087	60.04	0.327	1.9	730	354	1084	S	MT-0080	858.628	1.26597
2266553	NC_000962.3	C	G	9942.77	930	60.01	0.756	0	591	339	930	S	68995	710.925	1.30815
2266553	NC_000962.3	C	G	16852.8	1245	59.93	-0.662	3.223	680	559	1239	S	MT-2667	686.693	1.81304
2266553	NC_000962.3	C	G	9206.77	1130	59.95	-1.772	3.648	797	329	1126	S	MT-0712	929.442	1.21578
2266553	NC_000962.3	C	G	14484.8	1033	59.98	1.384	6.969	545	481	1026	S	MT-1336	596.214	1.7326
2266553	NC_000962.3	C	G	8458.77	650	59.8	1.176	1.751	359	286	645	S	MT-2665	424.731	1.53038
2266553	NC_000962.3	C	G	12781.8	1034	59.97	1.005	3.228	590	434	1024	S	MT-2356	630.417	1.64018
2266553	NC_000962.3	C	G	8734.77	1002	59.96	-0.447	0.57	694	304	998	S	MT-5383	810.086	1.23691
2266553	NC_000962.3	C	G	15034.8	1209	59.9	1.914	0	690	508	1198	S	MT-2762	689.696	1.75295
2266583	NC_000962.3	C	G	18459.8	1430	60.06	1.94	10.829	812	612	1424	S	MT-2151	952.498	1.50132
2266583	NC_000962.3	C	G	7618.77	868	59.99	1.535	18.532	598	268	866	S	MT-2800	672.144	1.29139
2266583	NC_000962.3	C	G	15508.8	1229	59.96	2.41	10.834	711	516	1227	S	MT-4166	780.291	1.57505
2266583	NC_000962.3	C	G	17495.8	1350	59.97	3.185	6.062	756	591	1347	S	MT-1212	748.265	1.80417
2266583	NC_000962.3	C	G	16108.8	1244	59.97	1.463	7.052	699	544	1243	S	MT-1206	707.427	1.75849
2266583	NC_000962.3	C	G	14331.8	1120	60.04	1.759	9.548	636	483	1119	S	MT-1103	724.505	1.54588
2266583	NC_000962.3	C	G	18596.8	1372	60.01	2.686	10.765	740	631	1371	S	MT-0718	814.878	1.68369
2266583	NC_000962.3	C	G	7287.77	697	59.98	2.644	8.383	434	259	693	S	MT-6218	589.217	1.18293
2266583	NC_000962.3	C	G	14206.8	1027	60.01	3.794	7	555	469	1024	S	MT-6084	570.377	1.80056
2266583	NC_000962.3	C	G	15555.8	1090	60.01	1.199	5.958	577	512	1089	S	MT-1684	680.222	1.60242
2266583	NC_000962.3	C	G	8617.77	1041	60.02	1.979	20.669	723	313	1036	S	MT-405	809.576	1.28586
2266583	NC_000962.3	C	G	15878.8	1177	59.92	-0.603	10.881	644	531	1175	S	MT-5543	723.238	1.6274
2266583	NC_000962.3	C	G	9654.77	1055	60.05	-0.2	11.545	714	340	1054	S	MT-0972	783.34	1.3468
2266583	NC_000962.3	C	G	9574.77	1026	59.99	0.374	20.466	689	334	1023	S	MT-5383	810.086	1.26653
2266583	NC_000962.3	C	G	13769.8	1224	59.99	2.59	17.088	754	470	1224	S	MT-5195	800.645	1.52877
2266583	NC_000962.3	C	G	9189.77	972	59.99	0.092	16.647	651	317	968	S	74856	795.746	1.2215
2266583	NC_000962.3	C	G	15815.8	1166	59.94	2.788	9.333	638	525	1163	S	MT-2175	708.086	1.64669
2266583	NC_000962.3	C	G	13652.8	1075	59.98	2.125	6.101	611	461	1072	S	MT-2356	630.417	1.70522
2266583	NC_000962.3	C	G	13711.8	1141	59.97	2.024	15.41	675	461	1136	S	MT-1393	744.375	1.53283
2266583	NC_000962.3	C	G	13552.8	1149	60.02	2.695	8.287	684	461	1145	S	MT-578	721.183	1.59322
2266583	NC_000962.3	C	G	8344.77	1011	59.99	0.901	20.83	709	300	1009	S	MT-5983	804.62	1.25649
2266583	NC_000962.3	C	G	17708.8	1278	59.97	3.324	6.001	690	584	1274	S	MT-1605	704.559	1.8139
2266583	NC_000962.3	C	G	7516.77	986	59.98	-0.029	23.693	705	278	983	S	MT-2771	821.752	1.19988
2266583	NC_000962.3	C	G	5423.77	676	59.96	1.541	15.36	471	198	669	S	MT-3173	585.845	1.15389
2266583	NC_000962.3	C	G	14907.8	1193	59.98	1.324	10.829	672	518	1190	S	MT-2762	689.696	1.72975
2266583	NC_000962.3	C	G	9414.77	1184	59.95	1.039	12.407	835	344	1179	S	MT-0712	929.442	1.27388
2266583	NC_000962.3	C	G	10448.8	936	60.01	0.986	13.94	574	358	932	S	68995	710.925	1.31659
2266583	NC_000962.3	C	G	15121.8	1134	60	2.196	10.645	612	518	1130	S	MT-3194	716.807	1.58202
2266583	NC_000962.3	C	G	5451.77	690	60.04	1.525	21.323	490	197	687	S	MT-6226	594.349	1.16093
2266583	NC_000962.3	C	G	7872.77	926	59.98	1.345	18.576	631	290	921	S	MT-289	757.674	1.22216
2266583	NC_000962.3	C	G	14446.8	1052	60.03	1.692	0	524	527	1051	S	MT-2465	562.872	1.86899
2266583	NC_000962.3	C	G	9289.77	1048	60.04	0.815	16.843	724	322	1046	S	MT-1838	809.501	1.29462
2266583	NC_000962.3	C	G	10854.8	1047	60.05	0.92	18.056	679	365	1044	S	MT-567	777.127	1.34727
2266583	NC_000962.3	C	G	10253.8	1095	60.04	2.404	11.551	736	357	1093	S	MT-0080	858.628	1.27529
2266583	NC_000962.3	C	G	16122.8	1128	59.96	3.33	3.223	585	539	1124	S	MT-2720	667.441	1.69004
2266583	NC_000962.3	C	G	13979.8	1109	59.97	2.323	6.019	634	471	1105	S	MT-389	674.259	1.64477
2266583	NC_000962.3	C	G	9449.77	1042	59.99	1.231	16.6	700	338	1038	S	MT-3341	795.415	1.31001
2266583	NC_000962.3	C	G	7606.77	902	60	-0.708	18.911	621	280	901	S	MT-2706	701.488	1.28584
2266583	NC_000962.3	C	G	7545.77	870	59.98	1.482	10.455	592	274	866	S	MT-5531	691.535	1.25807
2266583	NC_000962.3	C	G	9528.77	957	60.01	2.581	17.991	631	324	955	S	MT-5488	745.909	1.283
2266583	NC_000962.3	C	G	12369.8	1179	60	2.098	15.911	744	431	1175	S	MT-1466	761.306	1.54865
2266583	NC_000962.3	C	G	14565.8	1170	60.02	1.982	4.155	680	486	1166	S	MT-4942	684.058	1.71038
2266583	NC_000962.3	C	G	13757.8	1071	60	2.028	10.829	604	464	1068	S	MT-2174	619.613	1.7285
2266583	NC_000962.3	C	G	17512.8	1288	60.04	2.12	5.984	676	608	1284	S	MT-2769	687.439	1.87362
2266583	NC_000962.3	C	G	12333.8	1054	60	2.912	4.254	617	431	1048	S	MT-1549	632.614	1.6661
2266583	NC_000962.3	C	G	15299.8	1115	59.91	1.637	10.764	603	508	1111	S	MT-2184	678.348	1.6437
2266583	NC_000962.3	C	G	8806.77	1029	59.94	0.216	20.804	702	323	1025	S	MT-467	829.937	1.23985
2266583	NC_000962.3	C	G	10186.8	915	60.01	2.22	15.625	565	348	913	S	78932	638.347	1.43339
2266583	NC_000962.3	C	G	16659.8	1233	59.97	4.204	1.111	668	563	1231	S	MT-2667	686.693	1.79556
2266583	NC_000962.3	C	G	9316.77	864	60	3.523	9.769	551	308	859	S	MT-3787	609.73	1.41702
2266583	NC_000962.3	C	G	6633.77	765	59.99	0.949	12.022	528	229	757	S	MT-3255	645.747	1.18467
2266583	NC_000962.3	C	G	10183.8	1025	59.93	-1.002	20.109	679	345	1024	S	MT-3683	804.958	1.27336
2266583	NC_000962.3	C	G	9788.77	945	59.98	2.574	19.166	602	340	942	S	MT-3673	674.031	1.40201
2266583	NC_000962.3	C	G	10073.8	1008	60.05	2.46	25.665	657	350	1007	S	73787	778.122	1.29543
2266583	NC_000962.3	C	G	14324.8	1054	60	2.42	10.882	573	472	1045	S	MT-3271	654.699	1.6099
2266583	NC_000962.3	C	G	20689.8	1467	60.02	3.533	6.939	746	717	1463	S	MT-2473	793.868	1.84791
2266583	NC_000962.3	C	G	13948.8	955	60	-0.591	3.255	487	467	954	S	MT-1336	596.214	1.60177
2266583	NC_000962.3	C	G	8263.77	648	59.93	3.28	3.282	360	285	645	S	MT-2665	424.731	1.52567
2266583	NC_000962.3	C	G	10102.8	1135	59.97	1.27	16.592	770	363	1133	S	MT-4854	791.843	1.43336
2266583	NC_000962.3	C	G	14725.8	1151	60.05	3.659	11.965	649	499	1148	S	MT-504	665.023	1.73077
2266583	NC_000962.3	C	G	14423.8	1013	60	3.671	12.118	541	472	1013	S	MT-2474	619.076	1.63631
2266583	NC_000962.3	C	G	7035.77	798	60.07	3.152	23.082	548	248	796	S	MT-6429	657.841	1.21306
2266598	NC_000962.3	G	C	7081.77	1043	60.04	4.956	29.781	766	277	1043	S	MT-405	809.576	1.28833
2266598	NC_000962.3	G	C	11219.8	1148	59.99	7.206	14.665	740	403	1143	S	MT-1393	744.375	1.54223
2266598	NC_000962.3	G	C	9149.77	1059	60.07	5.308	21.479	731	328	1059	S	MT-567	777.127	1.36271
2266598	NC_000962.3	G	C	12136.8	1108	60.06	7.34	12.622	673	427	1100	S	MT-504	665.023	1.66611
2266598	NC_000962.3	G	C	7475.77	983	60.01	4.748	26.59	704	278	982	S	74856	795.746	1.23532
2266598	NC_000962.3	G	C	10488.8	1026	60.02	5.72	6.493	648	372	1020	S	MT-1549	632.614	1.62184
2266598	NC_000962.3	G	C	7769.77	1056	59.96	5.664	27.228	765	289	1054	S	MT-3683	804.958	1.31187
2266598	NC_000962.3	G	C	4565.77	701	60.04	3.893	27.626	521	180	701	S	MT-6226	594.349	1.17944
2266598	NC_000962.3	G	C	7747.77	1028	60.01	5.893	26.857	738	288	1026	S	MT-5383	810.086	1.269
2266598	NC_000962.3	G	C	12460.8	1032	60.01	6.012	14.157	616	411	1027	S	MT-3271	654.699	1.5763
2266598	NC_000962.3	G	C	15047.8	1416	60.06	5.88	14.221	888	523	1411	S	MT-2151	952.498	1.48662
2266598	NC_000962.3	G	C	6536.77	868	60	4.772	15.929	620	248	868	S	MT-5531	691.535	1.25518
2266598	NC_000962.3	G	C	7947.77	1037	60.03	5.2	26.6	748	287	1035	S	MT-3341	795.415	1.30372
2266598	NC_000962.3	G	C	11465.8	1037	59.99	5.076	8.54	633	399	1032	S	MT-2356	630.417	1.64494
2266598	NC_000962.3	G	C	11165.8	1082	59.97	6.851	8.781	689	387	1076	S	MT-389	674.259	1.60472
2266598	NC_000962.3	G	C	14516.8	1298	60.01	6.655	9.822	788	503	1291	S	MT-1212	748.265	1.73468
2266598	NC_000962.3	G	C	7233.77	630	59.94	3.908	2.526	373	250	623	S	MT-2665	424.731	1.48329
2266598	NC_000962.3	G	C	12501.8	1179	60.01	5.436	12.683	733	433	1166	S	MT-4166	780.291	1.51097
2266598	NC_000962.3	G	C	6006.77	784	60.07	3.493	22.013	562	222	784	S	MT-6429	657.841	1.19178
2266598	NC_000962.3	G	C	8674.77	1105	60.04	4.731	15.843	785	317	1102	S	MT-0080	858.628	1.28694
2266598	NC_000962.3	G	C	11599.8	1026	60.02	4.63	13.932	619	401	1020	S	MT-2174	619.613	1.65587
2266598	NC_000962.3	G	C	11019.8	1215	59.99	7.978	20.07	809	402	1211	S	MT-5195	800.645	1.51753
2266598	NC_000962.3	G	C	11876.8	1119	60.04	5.572	6.301	701	413	1114	S	MT-4942	684.058	1.63583
2266598	NC_000962.3	G	C	15246.8	1242	60.05	6.294	5.116	711	526	1237	S	MT-2769	687.439	1.80671
2266598	NC_000962.3	G	C	7125.77	1072	59.98	6.785	25.354	787	284	1071	S	MT-467	829.937	1.29166
2266598	NC_000962.3	G	C	4866.77	749	60.02	3.7	19.366	558	190	748	S	MT-3255	645.747	1.1599
2266598	NC_000962.3	G	C	8288.77	931	60.01	5.775	22.113	624	307	931	S	78932	638.347	1.45845
2266598	NC_000962.3	G	C	6289.77	839	60.02	5.327	24.551	606	233	839	S	MT-2800	672.144	1.24824
2266598	NC_000962.3	G	C	11534.8	1111	60.04	4.764	8.613	712	397	1109	S	MT-578	721.183	1.54052
2266598	NC_000962.3	G	C	6160.77	919	60.02	4.968	27.412	675	242	917	S	MT-2706	701.488	1.31007
2266598	NC_000962.3	G	C	13163.8	1112	59.95	5.046	12.34	657	450	1107	S	MT-2175	708.086	1.57043
2266598	NC_000962.3	G	C	12068.8	991	60.03	6.577	0	542	445	987	S	MT-2465	562.872	1.76061
2266598	NC_000962.3	G	C	7196.77	1030	60.06	4.473	22.853	760	269	1029	S	MT-1838	809.501	1.27239
2266598	NC_000962.3	G	C	8600.77	918	60.01	4.935	19.936	610	304	914	S	68995	710.925	1.29128
2266598	NC_000962.3	G	C	12854.8	1131	59.95	5.062	14.155	682	447	1129	S	MT-5543	723.238	1.5638
2266598	NC_000962.3	G	C	8206.77	1003	60.05	4.7	35.596	703	298	1001	S	73787	778.122	1.289
2266598	NC_000962.3	G	C	7625.77	947	60.01	5.528	28.495	673	274	947	S	MT-5488	745.909	1.26959
2266598	NC_000962.3	G	C	12531.8	1083	60.02	4.943	12.34	642	438	1080	S	MT-3194	716.807	1.51087
2266598	NC_000962.3	G	C	17411.8	1401	60.03	6.298	7.158	785	611	1396	S	MT-2473	793.868	1.76478
2266598	NC_000962.3	G	C	11722.8	927	60.01	4.593	7.157	527	398	925	S	MT-1336	596.214	1.55481
2266598	NC_000962.3	G	C	7742.77	1044	60.07	3.877	19.625	753	290	1043	S	MT-0972	783.34	1.33275
2266598	NC_000962.3	G	C	12811.8	1163	60	4.844	14.15	713	447	1160	S	MT-2762	689.696	1.68625
2266598	NC_000962.3	G	C	5958.77	709	59.98	4.73	9.016	481	224	705	S	MT-6218	589.217	1.20329
2266598	NC_000962.3	G	C	12085.8	1062	60.05	6.326	15.623	643	410	1053	S	MT-1103	724.505	1.46583
2266598	NC_000962.3	G	C	7839.77	933	60	6.171	23.008	643	288	931	S	MT-3673	674.031	1.38421
2266598	NC_000962.3	G	C	4357.77	685	59.99	4.1	18.4	509	175	684	S	MT-3173	585.845	1.16925
2266598	NC_000962.3	G	C	6743.77	922	59.99	6.45	29.229	672	249	921	S	MT-289	757.674	1.21688
2266598	NC_000962.3	G	C	13228.8	1198	60.03	6.372	12.627	732	462	1194	S	MT-1206	707.427	1.69346
2266598	NC_000962.3	G	C	5895.77	1007	60	4.455	28.837	768	237	1005	S	MT-2771	821.752	1.22543
2266598	NC_000962.3	G	C	11738.8	989	60.01	6.669	9.714	584	401	985	S	MT-6084	570.377	1.73394
2266598	NC_000962.3	G	C	13279.8	1069	59.94	4.92	12.373	623	441	1064	S	MT-2184	678.348	1.57589
2266598	NC_000962.3	G	C	13646.8	1141	59.99	7.006	4.121	661	472	1133	S	MT-2720	667.441	1.70951
2266598	NC_000962.3	G	C	10535.8	1177	60.01	6.955	16.64	793	383	1176	S	MT-1466	761.306	1.54603
2266598	NC_000962.3	G	C	8112.77	1168	60	5.307	18.614	862	305	1167	S	MT-0712	929.442	1.25667
2266598	NC_000962.3	G	C	7607.77	851	60	4.989	14.901	576	273	849	S	MT-3787	609.73	1.3957
2266598	NC_000962.3	G	C	7087.77	1016	60.01	5.434	27.777	752	263	1015	S	MT-5983	804.62	1.26271
2266598	NC_000962.3	G	C	15472.8	1333	60.03	7.555	14.17	786	536	1322	S	MT-0718	814.878	1.63583
2266598	NC_000962.3	G	C	8168.77	1122	60.02	5.179	20.164	809	311	1120	S	MT-4854	791.843	1.41695
2266598	NC_000962.3	G	C	14196.8	1168	60.01	7.563	2.505	682	482	1164	S	MT-2667	686.693	1.70091
2266598	NC_000962.3	G	C	14939.8	1227	60.02	5.826	9.711	714	504	1218	S	MT-1605	704.559	1.74151
2266598	NC_000962.3	G	C	12431.8	1047	60.01	4.209	5.106	618	428	1046	S	MT-1684	680.222	1.5392
2266598	NC_000962.3	G	C	11910.8	965	60	4.977	13.632	554	409	963	S	MT-2474	619.076	1.55877
2266604	NC_000962.3	C	G	5923.77	832	60.02	5.952	27.83	615	216	831	S	MT-2800	672.144	1.23783
2266604	NC_000962.3	C	G	11888.8	1053	60.03	5.07	17.306	648	401	1049	S	MT-3194	716.807	1.46901
2266604	NC_000962.3	C	G	12505.8	1152	60.01	5.186	15.898	724	427	1151	S	MT-2762	689.696	1.6703
2266604	NC_000962.3	C	G	7282.77	1011	60.07	4.368	25.518	748	260	1008	S	MT-0972	783.34	1.29063
2266604	NC_000962.3	C	G	11254.8	952	60.02	5.456	15.407	571	373	944	S	MT-6084	570.377	1.66907
2266604	NC_000962.3	C	G	7403.77	1146	60	5.756	28.664	866	279	1145	S	MT-0712	929.442	1.233
2266604	NC_000962.3	C	G	9086.77	1023	60.07	4.736	24.169	707	313	1020	S	MT-567	777.127	1.31639
2266604	NC_000962.3	C	G	10942.8	1087	60.04	4.138	11.513	719	366	1085	S	MT-578	721.183	1.50725
2266604	NC_000962.3	C	G	11498.8	920	60.01	4.817	9.745	537	381	918	S	MT-1336	596.214	1.54307
2266604	NC_000962.3	C	G	7253.77	941	60.01	4.45	29.181	677	263	940	S	MT-5488	745.909	1.26155
2266604	NC_000962.3	C	G	7644.77	853	60	4.966	17.034	592	258	850	S	MT-3787	609.73	1.39898
2266604	NC_000962.3	C	G	11759.8	1037	60.06	5.876	15.95	639	392	1031	S	MT-1103	724.505	1.43132
2266604	NC_000962.3	C	G	13015.8	1108	59.99	5.303	5.168	661	443	1104	S	MT-2720	667.441	1.66007
2266604	NC_000962.3	C	G	6854.77	1023	60.04	4.951	36.724	766	254	1020	S	MT-405	809.576	1.26362
2266604	NC_000962.3	C	G	11555.8	1092	60.04	5.453	6.402	700	385	1085	S	MT-4942	684.058	1.59636
2266604	NC_000962.3	C	G	8125.77	920	60.01	5.254	22.827	628	291	919	S	78932	638.347	1.44122
2266604	NC_000962.3	C	G	7483.77	1018	60.03	4.534	29.999	747	270	1017	S	MT-3341	795.415	1.27984
2266604	NC_000962.3	C	G	11211.8	985	60.02	3.682	17.613	607	376	983	S	MT-2174	619.613	1.5897
2266604	NC_000962.3	C	G	5949.77	990	60	3.699	31.846	762	227	989	S	MT-2771	821.752	1.20474
2266604	NC_000962.3	C	G	14423.8	1381	60.06	5.268	17.805	890	488	1378	S	MT-2151	952.498	1.44987
2266604	NC_000962.3	C	G	6550.77	918	59.99	6.05	35.509	675	241	916	S	MT-289	757.674	1.2116
2266604	NC_000962.3	C	G	11062.8	1013	59.99	4.81	8.759	638	371	1009	S	MT-2356	630.417	1.60687
2266604	NC_000962.3	C	G	8308.77	1087	60.04	4.363	22.135	788	295	1083	S	MT-0080	858.628	1.26597
2266604	NC_000962.3	C	G	11523.8	937	60.03	5.62	0	521	415	936	S	MT-2465	562.872	1.66468
2266604	NC_000962.3	C	G	11820.8	1139	60.02	5.373	13.091	734	395	1129	S	MT-4166	780.291	1.45971
2266604	NC_000962.3	C	G	13831.8	1248	60.01	5.345	11.346	772	467	1239	S	MT-1212	748.265	1.66786
2266604	NC_000962.3	C	G	12764.8	1044	59.93	4.601	17.204	627	414	1041	S	MT-2184	678.348	1.53903
2266604	NC_000962.3	C	G	11349.8	1118	59.99	6.07	16.202	732	386	1118	S	MT-1393	744.375	1.50193
2266604	NC_000962.3	C	G	17213.8	1357	60.03	4.631	8.347	774	582	1356	S	MT-2473	793.868	1.70935
2266604	NC_000962.3	C	G	14800.8	1198	60.06	5.567	8.456	702	492	1194	S	MT-2769	687.439	1.7427
2266604	NC_000962.3	C	G	7680.77	1025	60.01	5.918	32.656	744	280	1024	S	MT-5383	810.086	1.2653
2266604	NC_000962.3	C	G	13325.8	1159	60.02	4.91	12.877	701	453	1154	S	MT-1605	704.559	1.645
2266604	NC_000962.3	C	G	6945.77	1009	60.06	4.168	25.418	755	252	1007	S	MT-1838	809.501	1.24645
2266604	NC_000962.3	C	G	6392.77	865	60	4.731	22.395	628	234	862	S	MT-5531	691.535	1.25084
2266604	NC_000962.3	C	G	8057.77	1102	60.02	4.474	24.438	803	297	1100	S	MT-4854	791.843	1.39169
2266604	NC_000962.3	C	G	10519.8	1063	59.97	6.269	14.908	701	359	1060	S	MT-389	674.259	1.57655
2266604	NC_000962.3	C	G	4805.77	735	60.02	3.43	26.667	557	178	735	S	MT-3255	645.747	1.13822
2266604	NC_000962.3	C	G	11124.8	934	60	4.555	17.315	559	373	932	S	MT-2474	619.076	1.5087
2266604	NC_000962.3	C	G	11649.8	1012	60.01	3.694	8.414	616	390	1006	S	MT-1684	680.222	1.48775
2266604	NC_000962.3	C	G	7907.77	899	60.01	5.289	24.719	619	272	891	S	68995	710.925	1.26455
2266604	NC_000962.3	C	G	4179.77	675	59.99	3.526	17.203	508	163	671	S	MT-3173	585.845	1.15218
2266604	NC_000962.3	C	G	7390.77	1032	59.96	5.317	32.799	759	270	1029	S	MT-3683	804.958	1.28205
2266604	NC_000962.3	C	G	5889.77	688	59.98	3.554	12.008	481	206	687	S	MT-6218	589.217	1.16765
2266604	NC_000962.3	C	G	4207.77	684	60.04	4.595	32.586	521	162	683	S	MT-6226	594.349	1.15084
2266604	NC_000962.3	C	G	7150.77	1053	59.98	6.447	28.308	783	270	1053	S	MT-467	829.937	1.26877
2266604	NC_000962.3	C	G	7386.77	965	60.01	4.366	24.964	697	267	964	S	74856	795.746	1.2127
2266604	NC_000962.3	C	G	11515.8	1075	60.06	6.72	14.311	673	398	1071	S	MT-504	665.023	1.61649
2266604	NC_000962.3	C	G	12122.8	1108	59.95	5.798	17.863	693	411	1104	S	MT-5543	723.238	1.532
2266604	NC_000962.3	C	G	11788.8	1000	60.01	5.525	15.954	610	383	993	S	MT-3271	654.699	1.52742
2266604	NC_000962.3	C	G	10328.8	991	60.04	4.494	7.635	635	352	987	S	MT-1549	632.614	1.56652
2266604	NC_000962.3	C	G	11176.8	1185	59.98	7.054	20.641	797	384	1181	S	MT-5195	800.645	1.48006
2266604	NC_000962.3	C	G	12271.8	1084	59.95	4.974	16.106	673	410	1083	S	MT-2175	708.086	1.53089
2266604	NC_000962.3	C	G	6861.77	996	60.01	5.159	33.776	746	250	996	S	MT-5983	804.62	1.23785
2266604	NC_000962.3	C	G	7771.77	976	60.05	3.812	39.185	697	277	974	S	73787	778.122	1.2543
2266604	NC_000962.3	C	G	5976.77	912	60.02	5.48	31.001	683	226	909	S	MT-2706	701.488	1.30009
2266604	NC_000962.3	C	G	7504.77	916	60	5.456	25.69	646	269	915	S	MT-3673	674.031	1.35899
2266604	NC_000962.3	C	G	12580.8	1158	60.03	6.013	16.139	729	427	1156	S	MT-1206	707.427	1.63692
2266604	NC_000962.3	C	G	10272.8	1158	60.01	7.044	19.124	797	358	1155	S	MT-1466	761.306	1.52107
2266604	NC_000962.3	C	G	15130.8	1294	60.03	7.13	19.106	785	507	1292	S	MT-0718	814.878	1.58797
2266604	NC_000962.3	C	G	7393.77	637	59.96	3.601	6.151	383	249	632	S	MT-2665	424.731	1.49977
2266604	NC_000962.3	C	G	5440.77	771	60.07	3.494	28.055	569	200	769	S	MT-6429	657.841	1.17202
2266604	NC_000962.3	C	G	13435.8	1124	60.01	6.294	2.551	671	449	1120	S	MT-2667	686.693	1.63683
2266624	NC_000962.3	G	T	6488.77	847	60	2.23	11.332	605	240	845	K	MT-1549	632.614	1.33889
2266624	NC_000962.3	G	T	5275.77	929	60.01	4.099	43.351	720	209	929	K	MT-5383	810.086	1.14679
2266624	NC_000962.3	G	T	4174.77	785	59.98	3.63	36.949	617	168	785	K	MT-5531	691.535	1.13516
2266624	NC_000962.3	G	T	4312.77	961	60	2.876	30.386	777	184	961	K	MT-1838	809.501	1.18715
2266624	NC_000962.3	G	T	2598.77	624	59.97	2.957	22.511	504	120	624	K	MT-3173	585.845	1.06513
2266624	NC_000962.3	G	T	7652.77	864	60	4.323	28.44	598	266	864	K	MT-2174	619.613	1.39442
2266624	NC_000962.3	G	T	8254.77	958	60.02	3.796	23.101	656	302	958	K	MT-1103	724.505	1.32228
2266624	NC_000962.3	G	T	4295.77	795	59.95	3.144	34.575	625	169	794	K	MT-2800	672.144	1.18278
2266624	NC_000962.3	G	T	10719.8	1059	60.03	3.448	14.957	696	363	1059	K	MT-2769	687.439	1.5405
2266624	NC_000962.3	G	T	4645.77	855	59.98	2.262	39.592	666	189	855	K	MT-289	757.674	1.12845
2266624	NC_000962.3	G	T	5238.77	819	60	0.749	31.09	617	201	818	K	MT-3673	674.031	1.21508
2266624	NC_000962.3	G	T	7998.77	884	59.99	3.655	24.169	616	268	884	K	MT-3271	654.699	1.35024
2266624	NC_000962.3	G	T	8742.77	936	59.99	1.84	7.787	623	313	936	K	MT-2667	686.693	1.36305
2266624	NC_000962.3	G	T	7693.77	780	59.97	4.461	29.336	515	265	780	K	MT-1336	596.214	1.30826
2266624	NC_000962.3	G	T	4751.77	931	60.02	2.986	41.079	736	194	930	K	MT-405	809.576	1.14998
2266624	NC_000962.3	G	T	5075.77	903	59.99	4.637	48.385	700	200	900	K	74856	795.746	1.13478
2266624	NC_000962.3	G	T	7649.77	1064	60	1.978	28.005	779	285	1064	K	MT-5195	800.645	1.32893
2266624	NC_000962.3	G	T	4817.77	731	59.96	1.404	26.067	546	185	731	K	MT-3787	609.73	1.19889
2266624	NC_000962.3	G	T	7672.77	994	59.96	2.725	29.531	720	274	994	K	MT-1393	744.375	1.33535
2266624	NC_000962.3	G	T	7325.77	881	59.99	2.926	17.884	619	261	880	K	MT-2356	630.417	1.39749
2266624	NC_000962.3	G	T	7924.77	849	59.98	1.994	20.539	577	271	848	K	MT-6084	570.377	1.48849
2266624	NC_000962.3	G	T	7324.77	923	59.98	1.905	34.239	665	258	923	K	MT-389	674.259	1.36891
2266624	NC_000962.3	G	T	5245.77	907	59.99	0.997	45.607	698	209	907	K	73787	778.122	1.16563
2266624	NC_000962.3	G	T	3596.77	623	59.94	1.092	17.977	483	140	623	K	MT-6218	589.217	1.05734
2266624	NC_000962.3	G	T	8940.77	979	60	1.926	10.659	666	312	978	K	MT-2720	667.441	1.4668
2266624	NC_000962.3	G	T	5088.77	1039	59.98	4.491	33.593	826	213	1039	K	MT-0712	929.442	1.11788
2266624	NC_000962.3	G	T	7573.77	818	59.96	1.032	25.091	551	266	817	K	MT-2474	619.076	1.32132
2266624	NC_000962.3	G	T	4737.77	872	59.99	1.298	41.255	682	189	871	K	MT-5488	745.909	1.16904
2266624	NC_000962.3	G	T	3340.77	914	59.97	4.038	36.002	751	162	913	K	MT-2771	821.752	1.11226
2266624	NC_000962.3	G	T	4782.77	903	59.98	2.719	44.568	709	194	903	K	MT-3341	795.415	1.13526
2266624	NC_000962.3	G	T	9408.77	1089	59.99	2.874	17.587	758	331	1089	K	MT-1212	748.265	1.45537
2266624	NC_000962.3	G	T	8548.77	809	60	3.236	2.549	510	298	808	K	MT-2465	562.872	1.43727
2266624	NC_000962.3	G	T	4115.77	829	59.97	4.897	39.923	655	172	827	K	MT-2706	701.488	1.18177
2266624	NC_000962.3	G	T	5011.77	960	60	3.152	29.226	756	204	960	K	MT-4854	791.843	1.21236
2266624	NC_000962.3	G	T	7847.77	920	59.98	2.723	19.383	638	281	919	K	MT-3194	716.807	1.28347
2266624	NC_000962.3	G	T	8222.77	1035	59.98	2.874	22.169	736	298	1034	K	MT-4166	780.291	1.32643
2266624	NC_000962.3	G	T	6100.77	906	60	3.559	27.058	677	229	906	K	MT-567	777.127	1.16583
2266624	NC_000962.3	G	T	4777.77	938	59.93	5.064	45.386	738	199	937	K	MT-3683	804.958	1.16528
2266624	NC_000962.3	G	T	3168.77	678	59.99	1.194	33.232	540	135	675	K	MT-3255	645.747	1.04995
2266624	NC_000962.3	G	T	7708.77	963	60.01	3.764	16.257	684	277	961	K	MT-4942	684.058	1.40778
2266624	NC_000962.3	G	T	10002.8	1224	60	3.275	34.014	872	349	1221	K	MT-2151	952.498	1.28504
2266624	NC_000962.3	G	T	5735.77	1016	59.99	1.33	32.876	785	231	1016	K	MT-0080	858.628	1.18328
2266624	NC_000962.3	G	T	11798.8	1161	59.98	2.349	16.534	760	401	1161	K	MT-2473	793.868	1.46246
2266624	NC_000962.3	G	T	3183.76	728	60	2.66	25.593	588	140	728	K	MT-6429	657.841	1.10665
2266624	NC_000962.3	G	T	10759.8	1120	59.96	2.917	29.554	747	372	1119	K	MT-0718	814.878	1.37444
2266624	NC_000962.3	G	T	8729.77	1013	60.01	3.293	28.57	705	307	1012	K	MT-1206	707.427	1.43195
2266624	NC_000962.3	G	T	5038.77	921	60	3.122	41.452	721	199	920	K	MT-0972	783.34	1.17573
2266624	NC_000962.3	G	T	6889.77	950	60	1.162	16.382	702	248	950	K	MT-578	721.183	1.31728
2266624	NC_000962.3	G	T	4885.77	930	59.97	3.286	43.475	728	202	930	K	MT-467	829.937	1.12057
2266624	NC_000962.3	G	T	8517.77	917	59.93	4.296	21.279	629	287	916	K	MT-2184	678.348	1.35181
2266624	NC_000962.3	G	T	7171.77	1043	60	3.772	28.712	779	264	1043	K	MT-1466	761.306	1.37001
2266624	NC_000962.3	G	T	5350.77	785	59.99	2.258	33.006	581	204	785	K	78932	638.347	1.22974
2266624	NC_000962.3	G	T	7817.77	954	59.96	5.537	28.684	673	281	954	K	MT-5543	723.238	1.31907
2266624	NC_000962.3	G	T	4880.77	540	59.93	0.45	17.041	370	170	540	K	MT-2665	424.731	1.27139
2266624	NC_000962.3	G	T	8309.77	940	59.92	2.571	25.908	655	285	940	K	MT-2175	708.086	1.32752
2266624	NC_000962.3	G	T	8485.77	1018	59.99	3.696	28.038	709	307	1016	K	MT-2762	689.696	1.47601
2266624	NC_000962.3	G	T	3061.77	642	59.97	2.872	39	510	131	641	K	MT-6226	594.349	1.08017
2266624	NC_000962.3	G	T	7981.77	946	60.02	1.384	15.522	653	291	944	K	MT-504	665.023	1.42251
2266624	NC_000962.3	G	T	5472.77	820	60	3.274	31.591	619	201	820	K	68995	710.925	1.15343
2266624	NC_000962.3	G	T	4851.77	913	59.99	3.994	42.774	718	195	913	K	MT-5983	804.62	1.1347
2266624	NC_000962.3	G	T	9087.77	996	59.99	2.706	21.032	674	322	996	K	MT-1605	704.559	1.41365
2266624	NC_000962.3	G	T	8118.77	927	59.98	2.806	17.04	645	282	927	K	MT-1684	680.222	1.36279
2866551	NC_000962.3	C	G	11774.8	1300	57.12	-0.26	4.423	885	413	1298	S	MT-2769	687.439	1.89108
2866551	NC_000962.3	C	G	9630.77	1050	57.27	-0.813	1.898	717	331	1048	S	MT-2800	672.144	1.56217
2866551	NC_000962.3	C	G	11024.8	1108	56.57	1.857	5.242	721	386	1107	S	MT-1549	632.614	1.75146
2866551	NC_000962.3	C	G	8055.77	932	57.69	-0.803	4.537	650	280	930	S	MT-6226	594.349	1.5681
2866551	NC_000962.3	C	G	11126.8	1327	57.28	1.417	5.59	930	396	1326	S	MT-1206	707.427	1.87581
2866551	NC_000962.3	C	G	12248.8	1373	57.15	1.845	4.488	946	423	1369	S	MT-1103	724.505	1.89509
2866551	NC_000962.3	C	G	12059.8	1226	56.9	2.898	5.327	808	414	1222	S	MT-504	665.023	1.84355
2866551	NC_000962.3	C	G	12119.8	1283	57.07	0.628	5.357	855	424	1279	S	MT-2667	686.693	1.86837
2866551	NC_000962.3	C	G	11498.8	1296	57.41	-1.082	0.565	897	397	1294	S	MT-1838	809.501	1.60099
2866551	NC_000962.3	C	G	10712.8	1221	57.03	1.506	0	838	378	1216	S	MT-3271	654.699	1.86498
2866551	NC_000962.3	C	G	11338.8	1317	57.27	0.695	1.931	923	392	1315	S	MT-3683	804.958	1.63611
2866551	NC_000962.3	C	G	6785.77	1020	57.99	2.545	7.172	758	257	1015	S	MT-6429	657.841	1.55053
2866551	NC_000962.3	C	G	13148.8	1367	56.96	2.09	3.435	907	454	1361	S	MT-2175	708.086	1.93056
2866551	NC_000962.3	C	G	9782.77	1029	57.31	-0.493	1.188	694	332	1026	S	MT-3673	674.031	1.52664
2866551	NC_000962.3	C	G	13030.8	1344	57.07	1.383	6.461	898	444	1342	S	MT-2184	678.348	1.98128
2866551	NC_000962.3	C	G	10123.8	1185	57.38	-0.345	3.57	820	360	1180	S	MT-5531	691.535	1.71358
2866551	NC_000962.3	C	G	10167.8	999	56.9	2.452	6.166	624	371	995	S	MT-2465	562.872	1.77483
2866551	NC_000962.3	C	G	11044.8	1208	57.17	1.34	4.439	820	385	1205	S	MT-2356	630.417	1.91619
2866551	NC_000962.3	C	G	15592.8	1500	56.86	-1.24	4.245	966	534	1500	S	MT-0718	814.878	1.84077
2866551	NC_000962.3	C	G	13482.8	1429	57.24	1.107	4.407	974	453	1427	S	MT-5195	800.645	1.78481
2866551	NC_000962.3	C	G	10979.8	1390	57.04	3.182	1.219	978	404	1382	S	MT-1212	748.265	1.85763
2866551	NC_000962.3	C	G	13571.8	1396	57.35	0.349	6.428	927	460	1387	S	MT-4854	791.843	1.76298
2866551	NC_000962.3	C	G	15602.8	1499	56.93	-0.763	4.256	955	534	1489	S	MT-2151	952.498	1.57376
2866551	NC_000962.3	C	G	12236.8	1192	56.55	1.79	0	752	431	1183	S	MT-2720	667.441	1.78593
2866551	NC_000962.3	C	G	10514.8	1320	57.67	0.473	3.662	943	372	1315	S	MT-405	809.576	1.63048
2866551	NC_000962.3	C	G	11789.8	1351	57.08	2.679	2.71	934	416	1350	S	MT-389	674.259	2.00368
2866551	NC_000962.3	C	G	11298.8	1266	57.46	0.648	4.47	877	386	1263	S	MT-0972	783.34	1.61616
2866551	NC_000962.3	C	G	10878.8	1280	57.44	0.321	1.199	892	383	1275	S	MT-567	777.127	1.64709
2866551	NC_000962.3	C	G	9951.77	1192	57.32	0.506	6.761	835	353	1188	S	MT-2174	619.613	1.92378
2866551	NC_000962.3	C	G	10745.8	1150	56.87	2.179	1.841	760	387	1147	S	MT-2474	619.076	1.85761
2866551	NC_000962.3	C	G	10946.8	1197	57.09	0.117	2.652	804	388	1192	S	MT-1336	596.214	2.00767
2866551	NC_000962.3	C	G	13663.8	1410	56.75	1.86	4.391	933	472	1405	S	MT-5543	723.238	1.94957
2866551	NC_000962.3	C	G	10929.8	1235	57.78	0.863	7.879	865	369	1234	S	73787	778.122	1.58715
2866551	NC_000962.3	C	G	13075.8	1357	56.87	1.209	8.767	902	453	1355	S	MT-2762	689.696	1.96753
2866551	NC_000962.3	C	G	11900.8	1265	56.92	2.099	2.663	858	404	1262	S	MT-1605	704.559	1.79545
2866551	NC_000962.3	C	G	9869.77	1132	57.26	1.055	1.909	787	345	1132	S	MT-578	721.183	1.56964
2866551	NC_000962.3	C	G	8158.77	1086	57.73	0.284	4.682	788	293	1081	S	68995	710.925	1.52759
2866551	NC_000962.3	C	G	11048.8	1173	57.57	0.932	5.461	800	371	1171	S	MT-5488	745.909	1.57258
2866551	NC_000962.3	C	G	10240.8	1291	57.58	-1.973	1.955	920	367	1287	S	74856	795.746	1.62238
2866551	NC_000962.3	C	G	7799.77	942	57.44	-0.58	2.721	658	282	940	S	MT-3173	585.845	1.60793
2866551	NC_000962.3	C	G	7445.77	912	57.48	0.06	5.562	634	274	908	S	MT-6218	589.217	1.54782
2866551	NC_000962.3	C	G	12695.8	1364	57.01	1.508	3.47	920	441	1361	S	MT-3194	716.807	1.90288
2866551	NC_000962.3	C	G	8241.77	974	57.85	1.032	7.988	682	288	970	S	78932	638.347	1.52582
2866551	NC_000962.3	C	G	15174.8	1500	56.83	1.316	3.398	970	528	1498	S	MT-2473	793.868	1.88948
2866551	NC_000962.3	C	G	8878.77	1041	57.37	-0.06	0.572	730	309	1039	S	MT-3255	645.747	1.61209
2866551	NC_000962.3	C	G	12277.8	1415	57.49	1.972	4.519	990	422	1412	S	MT-467	829.937	1.70495
2866551	NC_000962.3	C	G	10966.8	1238	57.06	1.941	2.644	836	399	1235	S	MT-1684	680.222	1.81999
2866551	NC_000962.3	C	G	13830.8	1467	57.18	0.871	5.397	992	469	1461	S	MT-4166	780.291	1.88007
2866551	NC_000962.3	C	G	13379.8	1500	57.46	-0.77	1.89	1035	465	1500	S	MT-0712	929.442	1.61387
2866551	NC_000962.3	C	G	12890.8	1373	57.08	1.081	1.878	935	435	1370	S	MT-1466	761.306	1.80348
2866551	NC_000962.3	C	G	9953.77	1199	57.54	-0.95	0	845	351	1196	S	MT-289	757.674	1.58247
2866551	NC_000962.3	C	G	11685.8	1390	57.4	-0.389	1.929	974	414	1388	S	MT-5983	804.62	1.72752
2866551	NC_000962.3	C	G	11915.8	1332	57.56	0.96	2.68	924	406	1330	S	MT-2771	821.752	1.62093
2866551	NC_000962.3	C	G	11508.8	1258	56.79	1.069	0	864	391	1255	S	MT-4942	684.058	1.83903
2866551	NC_000962.3	C	G	11900.8	1349	57.2	2.268	1.906	930	414	1344	S	MT-1393	744.375	1.81226
2866551	NC_000962.3	C	G	12427.8	1412	57.42	-0.12	0	981	430	1411	S	MT-3341	795.415	1.77517
2866551	NC_000962.3	C	G	10457.8	1135	56.91	1.803	1.88	762	370	1132	S	MT-6084	570.377	1.98991
2866551	NC_000962.3	C	G	9342.77	1150	57.59	0.972	1.946	818	331	1149	S	MT-2706	701.488	1.63937
2866551	NC_000962.3	C	G	7467.77	837	56.37	0.96	2.579	546	285	831	S	MT-2665	424.731	1.97066
2866551	NC_000962.3	C	G	13569.8	1483	57.18	0.596	1.187	1010	471	1481	S	MT-0080	858.628	1.72717
2866551	NC_000962.3	C	G	12229.8	1361	57.38	0.811	3.529	936	422	1358	S	MT-5383	810.086	1.68007
2866551	NC_000962.3	C	G	9137.77	986	57.52	-0.034	5.443	675	308	983	S	MT-3787	609.73	1.61711
2866569	NC_000962.3	C	A	18058.8	1382	56.25	4.918	0	806	573	1379	M	MT-4942	684.058	2.0203
2866569	NC_000962.3	C	A	17103.8	1390	56.45	5.524	0	836	552	1388	M	MT-3271	654.699	2.12311
2866569	NC_000962.3	C	A	18985.8	1497	56.48	4.804	4.112	866	629	1495	M	MT-2184	678.348	2.20683
2866569	NC_000962.3	C	A	17716.8	1406	56.69	4.646	1.129	849	555	1404	M	MT-0972	783.34	1.79488
2866569	NC_000962.3	C	A	12579.8	1060	57.01	3.786	3.295	657	402	1059	M	MT-6226	594.349	1.78346
2866569	NC_000962.3	C	A	12516.8	1177	57.19	4.023	5.305	767	410	1177	M	MT-6429	657.841	1.78919
2866569	NC_000962.3	C	A	14698.8	1168	56.84	4.206	0.53	699	468	1167	M	MT-3673	674.031	1.73286
2866569	NC_000962.3	C	A	16093.8	1336	56.82	1.872	6.086	811	525	1336	M	MT-2174	619.613	2.15618
2866569	NC_000962.3	C	A	18446.8	1500	56.27	2.14	0	888	609	1497	M	MT-1212	748.265	2.00464
2866569	NC_000962.3	C	A	18105.8	1496	56.94	2.986	1.792	924	570	1494	M	74856	795.746	1.88
2866569	NC_000962.3	C	A	18178.8	1479	56.68	3.344	4.164	886	592	1478	M	MT-1206	707.427	2.09068
2866569	NC_000962.3	C	A	21548.8	1500	56.06	3.173	2.476	819	680	1499	M	MT-5543	723.238	2.07401
2866569	NC_000962.3	C	A	18738.8	1430	56.26	4.4	1.115	810	619	1429	M	MT-504	665.023	2.1503
2866569	NC_000962.3	C	A	22976.8	1500	56.29	2.3	4.057	800	699	1499	M	MT-4854	791.843	1.89431
2866569	NC_000962.3	C	A	19192.8	1500	56.57	2.979	0.533	901	598	1499	M	MT-5983	804.62	1.86423
2866569	NC_000962.3	C	A	15095.8	1219	56.84	4.476	1.769	747	470	1217	M	MT-3255	645.747	1.88774
2866569	NC_000962.3	C	A	20589.8	1500	56.46	4.658	1.108	856	643	1499	M	MT-1466	761.306	1.9703
2866569	NC_000962.3	C	A	14270.8	1121	56.68	4.044	1.746	608	513	1121	M	MT-2465	562.872	1.99157
2866569	NC_000962.3	C	A	12604.8	951	56.05	2.778	1.75	532	418	950	M	MT-2665	424.731	2.23906
2866569	NC_000962.3	C	A	17383.8	1479	56.9	4.549	1.148	926	553	1479	M	MT-405	809.576	1.82688
2866569	NC_000962.3	C	A	23714.8	1500	56.11	1.799	2.443	770	730	1500	M	MT-0718	814.878	1.84077
2866569	NC_000962.3	C	A	13585.8	1113	57.13	2.294	3.298	679	434	1113	M	78932	638.347	1.74357
2866569	NC_000962.3	C	A	18806.8	1500	56.59	5.488	1.124	900	598	1498	M	MT-5383	810.086	1.85166
2866569	NC_000962.3	C	A	19745.8	1500	56.36	2.39	2.472	868	632	1500	M	MT-1103	724.505	2.07038
2866569	NC_000962.3	C	A	19600.8	1500	56.31	5.953	3.27	866	634	1500	M	MT-2762	689.696	2.17487
2866569	NC_000962.3	C	A	16986.8	1338	56.83	3.943	3.305	809	529	1338	M	MT-5531	691.535	1.93483
2866569	NC_000962.3	C	A	19242.8	1500	56.72	4.538	2.505	900	598	1498	M	MT-467	829.937	1.80737
2866569	NC_000962.3	C	A	21385.8	1500	56.31	3.2	0.523	836	663	1499	M	MT-5195	800.645	1.87349
2866569	NC_000962.3	C	A	19137.8	1500	56.65	3.275	0	896	604	1500	M	MT-3341	795.415	1.88581
2866569	NC_000962.3	C	A	21375.8	1500	56.42	4.257	1.104	805	694	1499	M	MT-2473	793.868	1.88948
2866569	NC_000962.3	C	A	16046.8	1281	56.36	3.426	0.527	741	538	1279	M	MT-6084	570.377	2.24588
2866569	NC_000962.3	C	A	17563.8	1485	56.79	5.138	2.524	930	555	1485	M	MT-3683	804.958	1.84482
2866569	NC_000962.3	C	A	16862.8	1379	56.44	6.09	0	813	566	1379	M	MT-1684	680.222	2.02728
2866569	NC_000962.3	C	A	16760.8	1349	56.64	4.958	3.294	807	541	1348	M	MT-2356	630.417	2.13985
2866569	NC_000962.3	C	A	14425.8	1269	56.85	4.338	1.79	791	478	1269	M	MT-578	721.183	1.75961
2866569	NC_000962.3	C	A	18266.8	1427	56.43	2.623	1.757	822	603	1425	M	MT-2667	686.693	2.07808
2866569	NC_000962.3	C	A	17764.8	1484	56.56	5.027	0.529	883	600	1483	M	MT-2769	687.439	2.15874
2866569	NC_000962.3	C	A	19194.8	1500	56.82	4.531	1.123	899	600	1499	M	MT-2771	821.752	1.82537
2866569	NC_000962.3	C	A	15541.8	1284	57	4.465	2.532	796	487	1283	M	MT-2706	701.488	1.83039
2866569	NC_000962.3	C	A	16838.8	1361	56.9	4.509	0.535	831	528	1359	M	MT-289	757.674	1.79629
2866569	NC_000962.3	C	A	21023.8	1500	56.52	3.237	2.45	857	642	1499	M	MT-0712	929.442	1.61387
2866569	NC_000962.3	C	A	18673.8	1500	56.43	5.381	0	879	618	1497	M	MT-3194	716.807	2.09261
2866569	NC_000962.3	C	A	12777.8	1054	56.78	3.075	0.532	639	414	1053	M	MT-6218	589.217	1.78881
2866569	NC_000962.3	C	A	13099.8	1084	56.9	4.73	6.152	665	416	1081	M	MT-3173	585.845	1.85032
2866569	NC_000962.3	C	A	16485.8	1348	57.02	4.392	3.332	820	527	1347	M	MT-5488	745.909	1.80719
2866569	NC_000962.3	C	A	18125.8	1478	56.73	3.848	0	904	573	1477	M	MT-567	777.127	1.90188
2866569	NC_000962.3	C	A	15177.8	1192	56.42	3.753	1.125	712	480	1192	M	MT-2800	672.144	1.77343
2866569	NC_000962.3	C	A	20290.8	1500	56.3	4.211	0.525	838	660	1498	M	MT-2175	708.086	2.11839
2866569	NC_000962.3	C	A	18106.8	1446	56.25	3.699	1.115	845	599	1444	M	MT-1605	704.559	2.05235
2866569	NC_000962.3	C	A	18758.8	1500	56.73	3.88	1.124	915	584	1499	M	MT-1838	809.501	1.85299
2866569	NC_000962.3	C	A	16638.8	1255	56.22	4.136	3.235	708	545	1253	M	MT-1549	632.614	1.98383
2866569	NC_000962.3	C	A	18390.8	1499	56.55	5.816	1.126	911	585	1496	M	MT-1393	744.375	2.01377
2866569	NC_000962.3	C	A	12911.8	1243	57.19	3.841	1.847	811	432	1243	M	68995	710.925	1.74843
2866569	NC_000962.3	C	A	16396.8	1321	56.39	4.956	1.756	769	552	1321	M	MT-2474	619.076	2.13383
2866569	NC_000962.3	C	A	14043.8	1156	56.9	4.597	5.118	701	455	1156	M	MT-3787	609.73	1.89592
2866569	NC_000962.3	C	A	17891.8	1339	56.37	2.521	1.744	756	582	1338	M	MT-1336	596.214	2.24584
2866569	NC_000962.3	C	A	19056.8	1500	56.33	2.736	1.12	877	621	1498	M	MT-389	674.259	2.22466
2866569	NC_000962.3	C	A	18498.8	1364	56.18	4.665	0	751	612	1363	M	MT-2720	667.441	2.04363
2866569	NC_000962.3	C	A	22086.8	1500	56.35	2.6	1.748	817	682	1499	M	MT-4166	780.291	1.92236
2866569	NC_000962.3	C	A	17945.8	1417	57.13	2.117	6.113	856	559	1415	M	73787	778.122	1.82105
2866569	NC_000962.3	C	A	21315.8	1500	56.29	3.669	1.743	848	651	1499	M	MT-0080	858.628	1.74697
2866569	NC_000962.3	C	A	22283.8	1499	56.44	2.665	2.452	808	690	1498	M	MT-2151	952.498	1.57376
2866578	NC_000962.3	C	A	16877.8	1317	56.91	6.022	2.487	794	522	1316	M	MT-2706	701.488	1.87744
2866578	NC_000962.3	C	A	19561.8	1471	56.49	5.855	1.735	834	635	1469	M	MT-2667	686.693	2.14215
2866578	NC_000962.3	C	A	15200.8	1155	56.78	5.122	0	612	543	1155	M	MT-2465	562.872	2.05198
2866578	NC_000962.3	C	A	16128.8	1237	56.76	6.718	1.783	739	498	1237	M	MT-3255	645.747	1.91561
2866578	NC_000962.3	C	A	20129.8	1500	56.4	6.324	0	845	654	1499	M	MT-3194	716.807	2.09261
2866578	NC_000962.3	C	A	18259.8	1405	56.45	7.169	0	826	579	1405	M	MT-3271	654.699	2.14602
2866578	NC_000962.3	C	A	18300.8	1393	56.36	6.563	0	787	606	1393	M	MT-1684	680.222	2.04786
2866578	NC_000962.3	C	A	20776.8	1500	56.63	4.299	4.082	857	643	1500	M	MT-467	829.937	1.80737
2866578	NC_000962.3	C	A	22765.8	1500	56.18	4.542	1.1	817	683	1500	M	MT-0080	858.628	1.74697
2866578	NC_000962.3	C	A	17702.8	1286	56.35	6.456	3.235	712	574	1286	M	MT-1549	632.614	2.03284
2866578	NC_000962.3	C	A	19825.8	1500	56.62	5.41	5.003	869	631	1500	M	MT-1206	707.427	2.12036
2866578	NC_000962.3	C	A	17797.8	1364	56.96	5.901	4.158	801	562	1363	M	MT-5488	745.909	1.82864
2866578	NC_000962.3	C	A	17273.8	1379	56.86	4.3	6	815	563	1378	M	MT-2174	619.613	2.22558
2866578	NC_000962.3	C	A	21878.8	1500	56.5	4.093	2.443	832	667	1499	M	MT-0712	929.442	1.61387
2866578	NC_000962.3	C	A	15680.8	1296	56.95	6.344	1.785	789	506	1295	M	MT-578	721.183	1.79705
2866578	NC_000962.3	C	A	18192.8	1373	56.76	6.747	3.263	807	565	1372	M	MT-5531	691.535	1.98544
2866578	NC_000962.3	C	A	20207.8	1500	56.7	5.763	0.529	867	632	1499	M	MT-2771	821.752	1.82537
2866578	NC_000962.3	C	A	24377.8	1500	56.14	3.05	4.048	764	735	1499	M	MT-4854	791.843	1.89431
2866578	NC_000962.3	C	A	18606.8	1487	56.82	6.348	1.134	904	583	1487	M	MT-405	809.576	1.83676
2866578	NC_000962.3	C	A	22878.8	1500	55.99	4.923	4.069	780	720	1500	M	MT-5543	723.238	2.07401
2866578	NC_000962.3	C	A	19382.8	1443	57.01	3.61	6.012	845	597	1442	M	73787	778.122	1.85446
2866578	NC_000962.3	C	A	20817.8	1498	56.39	5.842	0	854	644	1498	M	MT-5383	810.086	1.84919
2866578	NC_000962.3	C	A	13754.8	1096	56.98	6.228	2.513	665	431	1096	M	MT-6226	594.349	1.84403
2866578	NC_000962.3	C	A	20534.8	1500	56.38	3.485	1.753	848	651	1499	M	MT-389	674.259	2.22466
2866578	NC_000962.3	C	A	13770.8	1171	57.03	4.498	4.179	729	441	1170	M	MT-6429	657.841	1.78007
2866578	NC_000962.3	C	A	17587.8	1311	56.34	5.72	0	740	568	1308	M	MT-6084	570.377	2.29848
2866578	NC_000962.3	C	A	18918.8	1494	56.63	8.15	0.527	869	625	1494	M	MT-2769	687.439	2.17328
2866578	NC_000962.3	C	A	20116.8	1500	56.45	7.142	3.244	845	653	1498	M	MT-2184	678.348	2.21125
2866578	NC_000962.3	C	A	19257.8	1468	56.32	5.981	0	842	624	1466	M	MT-1605	704.559	2.08357
2866578	NC_000962.3	C	A	14026.8	1281	57.17	5.323	1.146	818	462	1280	M	68995	710.925	1.80188
2866578	NC_000962.3	C	A	22095.8	1499	56.34	5.654	0.52	820	678	1498	M	MT-1466	761.306	1.96898
2866578	NC_000962.3	C	A	23684.8	1500	56.24	3.075	1.101	779	721	1500	M	MT-4166	780.291	1.92236
2866578	NC_000962.3	C	A	13545.8	969	56.19	4.954	2.435	531	438	969	M	MT-2665	424.731	2.28144
2866578	NC_000962.3	C	A	22913.8	1499	56.55	3.649	0.522	796	700	1496	M	MT-2151	952.498	1.57376
2866578	NC_000962.3	C	A	21101.8	1490	56.23	6.398	1.759	820	670	1490	M	MT-2762	689.696	2.16037
2866578	NC_000962.3	C	A	20325.8	1500	56.53	5.168	1.757	871	629	1500	M	MT-5983	804.62	1.86423
2866578	NC_000962.3	C	A	19491.8	1500	56.76	5.878	1.766	896	604	1500	M	74856	795.746	1.88502
2866578	NC_000962.3	C	A	19521.8	1380	56.16	6.522	0	749	631	1380	M	MT-2720	667.441	2.0676
2866578	NC_000962.3	C	A	13535.8	1085	56.71	5.741	1.111	644	441	1085	M	MT-6218	589.217	1.84143
2866578	NC_000962.3	C	A	20001.8	1500	56.52	6.308	1.107	872	627	1499	M	MT-1393	744.375	2.01511
2866578	NC_000962.3	C	A	20533.8	1500	56.5	4.658	0.528	855	643	1498	M	MT-3341	795.415	1.88581
2866578	NC_000962.3	C	A	19418.8	1421	56.56	6.229	0.529	825	593	1418	M	MT-0972	783.34	1.81403
2866578	NC_000962.3	C	A	21079.8	1500	56.33	4.731	1.113	838	660	1498	M	MT-1103	724.505	2.07038
2866578	NC_000962.3	C	A	22767.8	1500	56.28	3.905	0.517	806	694	1500	M	MT-5195	800.645	1.87349
2866578	NC_000962.3	C	A	14688.8	1122	56.81	6.846	6.05	672	450	1122	M	MT-3173	585.845	1.91518
2866578	NC_000962.3	C	A	14647.8	1145	57.05	3.949	3.26	680	464	1144	M	78932	638.347	1.7937
2866578	NC_000962.3	C	A	19830.8	1500	56.57	5.563	1.115	880	620	1500	M	MT-1838	809.501	1.85299
2866578	NC_000962.3	C	A	18113.8	1362	56.29	6.157	1.75	762	599	1361	M	MT-2474	619.076	2.20005
2866578	NC_000962.3	C	A	20646.8	1499	56.09	2.034	0	842	656	1498	M	MT-1212	748.265	2.0033
2866578	NC_000962.3	C	A	18305.8	1414	56.62	7.04	3.278	832	582	1414	M	MT-2356	630.417	2.24296
2866578	NC_000962.3	C	A	18721.8	1499	56.71	7.088	3.282	910	588	1498	M	MT-3683	804.958	1.86221
2866578	NC_000962.3	C	A	15952.8	1188	56.71	5.586	1.116	687	501	1188	M	MT-3673	674.031	1.76253
2866578	NC_000962.3	C	A	15199.8	1181	56.85	7.018	5.077	705	476	1181	M	MT-3787	609.73	1.93692
2866578	NC_000962.3	C	A	19047.8	1379	56.38	6.049	3.209	760	617	1377	M	MT-1336	596.214	2.31293
2866578	NC_000962.3	C	A	24322.8	1500	56.11	3.949	0.521	757	742	1499	M	MT-0718	814.878	1.84077
2866578	NC_000962.3	C	A	18771.8	1395	56.73	7.229	1.112	821	573	1394	M	MT-289	757.674	1.84116
2866578	NC_000962.3	C	A	22517.8	1500	56.19	4.701	1.742	799	699	1498	M	MT-2175	708.086	2.11839
2866578	NC_000962.3	C	A	19536.8	1436	56.22	7.272	0.527	821	614	1435	M	MT-4942	684.058	2.09924
2866578	NC_000962.3	C	A	16703.8	1212	56.33	5.831	1.111	702	510	1212	M	MT-2800	672.144	1.80319
2866578	NC_000962.3	C	A	19696.8	1473	56.34	6.108	0.522	823	648	1471	M	MT-504	665.023	2.21496
2866578	NC_000962.3	C	A	19077.8	1500	56.63	6.637	0	899	601	1500	M	MT-567	777.127	1.93019
2866578	NC_000962.3	C	A	22668.8	1500	56.38	6.183	0.521	778	721	1499	M	MT-2473	793.868	1.88948
2866580	NC_000962.3	A	G	12898.8	974	56.26	5.504	1.735	532	438	970	R	MT-2665	424.731	2.29322
2866580	NC_000962.3	A	G	20221.8	1500	56.32	5.29	0.525	840	657	1497	R	MT-5383	810.086	1.85166
2866580	NC_000962.3	A	G	21554.8	1499	56.63	4.044	1.103	805	689	1494	R	MT-2151	952.498	1.57376
2866580	NC_000962.3	A	G	21578.8	1500	56.31	5.785	0.52	813	684	1497	R	MT-1466	761.306	1.9703
2866580	NC_000962.3	A	G	17678.8	1360	56.3	5.975	1.747	750	607	1357	R	MT-2474	619.076	2.19682
2866580	NC_000962.3	A	G	14352.8	1148	57.06	4.393	3.271	681	467	1148	R	78932	638.347	1.79839
2866580	NC_000962.3	A	G	17545.8	1411	56.45	7.34	0	825	582	1407	R	MT-3271	654.699	2.15519
2866580	NC_000962.3	A	G	19428.8	1500	56.54	6.616	0.529	871	628	1499	R	MT-1393	744.375	2.01511
2866580	NC_000962.3	A	G	18585.8	1498	56.63	6.698	0	889	604	1493	R	MT-567	777.127	1.92761
2866580	NC_000962.3	A	G	19219.8	1500	56.74	6.338	1.122	890	608	1498	R	74856	795.746	1.88502
2866580	NC_000962.3	A	G	19105.8	1481	56.53	6.618	1.111	840	638	1478	R	MT-2667	686.693	2.15671
2866580	NC_000962.3	A	G	19026.8	1424	56.54	5.937	1.12	819	603	1422	R	MT-0972	783.34	1.81786
2866580	NC_000962.3	A	G	18402.8	1382	56.43	6.402	2.456	763	619	1382	R	MT-1336	596.214	2.31796
2866580	NC_000962.3	A	G	15518.8	1239	56.77	7.174	1.763	739	499	1238	R	MT-3255	645.747	1.91871
2866580	NC_000962.3	A	G	18792.8	1474	56.35	6.126	0	843	625	1468	R	MT-1605	704.559	2.09209
2866580	NC_000962.3	A	G	15641.8	1189	56.69	5.63	1.756	683	503	1186	R	MT-3673	674.031	1.76401
2866580	NC_000962.3	A	G	17539.8	1413	56.43	7.131	0	804	607	1411	R	MT-1684	680.222	2.07726
2866580	NC_000962.3	A	G	21956.8	1500	56.46	6.529	0	782	715	1497	R	MT-2473	793.868	1.88948
2866580	NC_000962.3	A	G	15997.8	1208	56.31	5.954	1.118	694	512	1206	R	MT-2800	672.144	1.79723
2866580	NC_000962.3	A	G	15028.8	1287	56.96	6.298	1.787	777	508	1285	R	MT-578	721.183	1.78457
2866580	NC_000962.3	A	G	13044.8	1099	56.98	6.455	3.284	661	435	1096	R	MT-6226	594.349	1.84908
2866580	NC_000962.3	A	G	19752.8	1500	56.49	4.548	0	847	650	1497	R	MT-3341	795.415	1.88581
2866580	NC_000962.3	A	G	20216.8	1500	56.59	4.056	3.262	849	648	1497	R	MT-467	829.937	1.80737
2866580	NC_000962.3	A	G	20029.8	1500	56.47	6.821	2.457	840	657	1497	R	MT-2184	678.348	2.21125
2866580	NC_000962.3	A	G	17664.8	1295	56.45	6.349	2.461	712	581	1293	R	MT-1549	632.614	2.04706
2866580	NC_000962.3	A	G	16248.8	1317	56.9	6.412	2.5	792	523	1315	R	MT-2706	701.488	1.87744
2866580	NC_000962.3	A	G	20158.8	1500	56.08	2.063	0	837	659	1496	R	MT-1212	748.265	2.00464
2866580	NC_000962.3	A	G	18294.8	1498	56.63	8.191	0	866	628	1494	R	MT-2769	687.439	2.1791
2866580	NC_000962.3	A	G	16933.8	1389	56.9	4.759	4.136	819	567	1386	R	MT-2174	619.613	2.24172
2866580	NC_000962.3	A	G	18317.8	1500	56.82	6.206	1.129	908	589	1497	R	MT-405	809.576	1.85282
2866580	NC_000962.3	A	G	17846.8	1403	56.72	7.76	0.534	824	578	1402	R	MT-289	757.674	1.85172
2866580	NC_000962.3	A	G	13514.8	1123	56.81	6.976	5.094	667	454	1121	R	MT-3173	585.845	1.91689
2866580	NC_000962.3	A	G	19447.8	1500	56.68	5.418	1.106	857	642	1499	R	MT-2771	821.752	1.82537
2866580	NC_000962.3	A	G	14971.8	1162	56.84	4.928	0.521	611	551	1162	R	MT-2465	562.872	2.06441
2866580	NC_000962.3	A	G	19231.8	1447	56.19	7.094	0	816	624	1440	R	MT-4942	684.058	2.11532
2866580	NC_000962.3	A	G	22183.8	1499	55.98	4.849	3.226	771	722	1493	R	MT-5543	723.238	2.07262
2866580	NC_000962.3	A	G	19839.8	1500	56.56	5.899	1.113	872	625	1497	R	MT-5983	804.62	1.86423
2866580	NC_000962.3	A	G	14843.8	1185	56.85	7.219	5.077	703	482	1185	R	MT-3787	609.73	1.94348
2866580	NC_000962.3	A	G	22152.8	1500	56.26	3.85	0	798	700	1498	R	MT-5195	800.645	1.87349
2866580	NC_000962.3	A	G	23915.8	1500	56.15	3.016	3.998	758	741	1499	R	MT-4854	791.843	1.89431
2866580	NC_000962.3	A	G	22054.8	1500	56.14	4.371	0.52	807	690	1497	R	MT-0080	858.628	1.74697
2866580	NC_000962.3	A	G	21711.8	1500	56.2	4.493	1.102	792	704	1496	R	MT-2175	708.086	2.11839
2866580	NC_000962.3	A	G	19201.8	1500	56.59	6.143	1.105	877	621	1498	R	MT-1838	809.501	1.85299
2866580	NC_000962.3	A	G	17354.8	1368	56.95	6.115	3.289	797	569	1366	R	MT-5488	745.909	1.834
2866580	NC_000962.3	A	G	12834.8	1095	56.72	6.089	1.123	649	444	1093	R	MT-6218	589.217	1.8584
2866580	NC_000962.3	A	G	20069.8	1500	56.41	2.994	0.525	840	658	1498	R	MT-389	674.259	2.22466
2866580	NC_000962.3	A	G	19179.8	1405	56.16	6.622	0	760	642	1402	R	MT-2720	667.441	2.10506
2866580	NC_000962.3	A	G	21112.8	1500	56.55	4.06	2.443	834	666	1500	R	MT-0712	929.442	1.61387
2866580	NC_000962.3	A	G	13263.8	1171	56.98	4.38	5.118	724	445	1169	R	MT-6429	657.841	1.78007
2866580	NC_000962.3	A	G	13500.8	1289	57.18	5.294	1.144	817	471	1288	R	68995	710.925	1.81313
2866580	NC_000962.3	A	G	20464.8	1500	56.23	6.531	1.745	819	677	1496	R	MT-2762	689.696	2.17487
2866580	NC_000962.3	A	G	22572.8	1500	56.29	2.91	1.741	777	720	1497	R	MT-4166	780.291	1.92236
2866580	NC_000962.3	A	G	21157.8	1499	56.29	4.349	1.096	824	670	1494	R	MT-1103	724.505	2.069
2866580	NC_000962.3	A	G	19462.8	1468	56.38	6.296	0.522	814	650	1464	R	MT-504	665.023	2.20744
2866580	NC_000962.3	A	G	23076.8	1499	56.13	4.67	0	754	738	1492	R	MT-0718	814.878	1.83954
2866580	NC_000962.3	A	G	17191.8	1314	56.4	5.963	0	742	570	1312	R	MT-6084	570.377	2.30374
2866580	NC_000962.3	A	G	18083.8	1419	56.58	6.713	4.117	823	593	1416	R	MT-2356	630.417	2.25089
2866580	NC_000962.3	A	G	19698.8	1500	56.44	6.273	0	840	658	1498	R	MT-3194	716.807	2.09261
2866580	NC_000962.3	A	G	19057.8	1457	57	4.077	4.158	850	607	1457	R	73787	778.122	1.87246
2866580	NC_000962.3	A	G	18327.8	1500	56.68	7.142	2.507	905	593	1498	R	MT-3683	804.958	1.86345
2866580	NC_000962.3	A	G	17358.8	1374	56.73	7.185	2.499	804	570	1374	R	MT-5531	691.535	1.98688
2866580	NC_000962.3	A	G	19259.8	1500	56.61	5.688	5.003	865	634	1499	R	MT-1206	707.427	2.12036
2866607	NC_000962.3	G	A	17391.8	1392	56.79	5.694	1.116	809	582	1391	R	MT-2174	619.613	2.24656
2866607	NC_000962.3	G	A	19849.8	1416	56.45	4.938	0.522	799	615	1414	R	MT-0972	783.34	1.80764
2866607	NC_000962.3	G	A	18440.8	1484	56.71	3.543	1.789	886	595	1481	R	MT-3683	804.958	1.84357
2866607	NC_000962.3	G	A	19146.8	1500	56.85	5.371	3.247	862	636	1498	R	MT-2473	793.868	1.88948
2866607	NC_000962.3	G	A	19526.8	1483	56.22	5.412	1.741	823	655	1478	R	MT-2667	686.693	2.15963
2866607	NC_000962.3	G	A	21680.8	1500	56.34	5.816	0	807	690	1497	R	MT-5543	723.238	2.07401
2866607	NC_000962.3	G	A	20304.8	1493	56.39	3.676	0	827	662	1489	R	MT-2762	689.696	2.16472
2866607	NC_000962.3	G	A	21968.8	1500	56.41	7.128	2.465	813	685	1498	R	MT-4854	791.843	1.89431
2866607	NC_000962.3	G	A	15044.8	1205	56.91	4.371	0.53	707	495	1202	R	78932	638.347	1.88769
2866607	NC_000962.3	G	A	18222.8	1274	56.3	3.209	0	686	588	1274	R	MT-1549	632.614	2.01387
2866607	NC_000962.3	G	A	19257.8	1500	56.38	5.1	2.475	862	638	1500	R	MT-1605	704.559	2.12899
2866607	NC_000962.3	G	A	19460.8	1476	56.57	5.714	1.755	850	625	1475	R	74856	795.746	1.85486
2866607	NC_000962.3	G	A	19727.8	1494	56.62	4.295	0	854	635	1489	R	MT-2771	821.752	1.81807
2866607	NC_000962.3	G	A	15385.8	1156	56.71	3.404	4.07	609	546	1155	R	MT-2465	562.872	2.05375
2866607	NC_000962.3	G	A	18203.8	1500	56.88	5.02	0.534	911	584	1495	R	MT-0712	929.442	1.61387
2866607	NC_000962.3	G	A	20036.8	1480	56.48	3.888	0	832	645	1477	R	MT-2184	678.348	2.18177
2866607	NC_000962.3	G	A	20739.8	1500	56.46	4.343	0.522	838	657	1495	R	MT-1466	761.306	1.9703
2866607	NC_000962.3	G	A	19542.8	1500	56.56	5.847	1.116	869	627	1496	R	MT-389	674.259	2.22466
2866607	NC_000962.3	G	A	19715.8	1397	56.1	3.942	2.458	766	629	1395	R	MT-4942	684.058	2.04222
2866607	NC_000962.3	G	A	13794.8	1083	56.51	3.311	1.762	630	453	1083	R	MT-6218	589.217	1.83803
2866607	NC_000962.3	G	A	16555.8	1203	56.31	4.546	0	675	525	1200	R	MT-2800	672.144	1.7898
2866607	NC_000962.3	G	A	20726.8	1490	56.39	4.328	0	836	649	1485	R	MT-5383	810.086	1.83931
2866607	NC_000962.3	G	A	18469.8	1355	56.57	5.504	4.084	770	581	1351	R	MT-5531	691.535	1.95941
2866607	NC_000962.3	G	A	20930.8	1500	56.26	3.839	0.523	818	679	1497	R	MT-2175	708.086	2.11839
2866607	NC_000962.3	G	A	19640.8	1500	56.31	6.123	0.529	875	624	1499	R	MT-1212	748.265	2.00464
2866607	NC_000962.3	G	A	13509.8	976	56.37	4.628	1.106	537	438	975	R	MT-2665	424.731	2.29793
2866607	NC_000962.3	G	A	19002.8	1474	56.48	4.114	1.75	837	633	1470	R	MT-2769	687.439	2.14419
2866607	NC_000962.3	G	A	18816.8	1426	56.43	3.439	1.108	822	601	1423	R	MT-3271	654.699	2.1781
2866607	NC_000962.3	G	A	19632.8	1500	56.69	6.488	0	869	631	1500	R	MT-3341	795.415	1.88581
2866607	NC_000962.3	G	A	14101.8	1107	56.8	3.587	4.099	652	454	1106	R	MT-6226	594.349	1.86254
2866607	NC_000962.3	G	A	14151.8	1279	57.13	4.669	0.538	802	475	1277	R	68995	710.925	1.79906
2866607	NC_000962.3	G	A	13868.8	1163	56.85	4.765	3.29	711	450	1161	R	MT-6429	657.841	1.7679
2866607	NC_000962.3	G	A	16800.8	1327	56.82	4.619	1.771	783	543	1326	R	MT-2706	701.488	1.89169
2866607	NC_000962.3	G	A	19423.8	1465	56.88	6.476	2.482	848	614	1462	R	73787	778.122	1.88274
2866607	NC_000962.3	G	A	20288.8	1500	56.56	6.041	0	849	650	1499	R	MT-4166	780.291	1.92236
2866607	NC_000962.3	G	A	19506.8	1490	56.5	2.889	0	859	627	1486	R	MT-1393	744.375	2.00168
2866607	NC_000962.3	G	A	19960.8	1496	56.43	4.317	0.524	865	628	1493	R	MT-5983	804.62	1.85926
2866607	NC_000962.3	G	A	19547.8	1500	56.32	5.632	2.475	858	639	1497	R	MT-1103	724.505	2.07038
2866607	NC_000962.3	G	A	15918.8	1202	56.66	4.27	0	684	515	1199	R	MT-3673	674.031	1.7833
2866607	NC_000962.3	G	A	16235.8	1235	56.58	3.415	2.485	714	519	1233	R	MT-3255	645.747	1.91251
2866607	NC_000962.3	G	A	14972.8	1091	56.54	2.731	7.084	614	474	1088	R	MT-3173	585.845	1.86227
2866607	NC_000962.3	G	A	19064.8	1341	56.41	5.883	0.522	725	612	1337	R	MT-1336	596.214	2.24919
2866607	NC_000962.3	G	A	18329.8	1500	56.92	6.788	0	897	601	1498	R	MT-2151	952.498	1.57481
2866607	NC_000962.3	G	A	19139.8	1491	56.64	5.046	0.527	874	611	1485	R	MT-1838	809.501	1.84188
2866607	NC_000962.3	G	A	18816.8	1495	56.77	3.687	0.534	888	605	1493	R	MT-405	809.576	1.84665
2866607	NC_000962.3	G	A	17624.8	1355	56.88	4.185	1.124	779	572	1351	R	MT-5488	745.909	1.81658
2866607	NC_000962.3	G	A	18516.8	1428	56.32	3.277	4.064	803	621	1424	R	MT-1684	680.222	2.09931
2866607	NC_000962.3	G	A	19868.8	1408	56.16	3.253	4.036	757	651	1408	R	MT-2720	667.441	2.10955
2866607	NC_000962.3	G	A	17636.8	1300	56.36	4.471	3.241	728	571	1299	R	MT-6084	570.377	2.27919
2866607	NC_000962.3	G	A	15008.8	1260	56.96	2.993	0	752	508	1260	R	MT-578	721.183	1.74713
2866607	NC_000962.3	G	A	20109.8	1495	56.22	2.965	3.235	833	660	1493	R	MT-3194	716.807	2.08564
2866607	NC_000962.3	G	A	19409.8	1485	56.4	4.14	0	856	622	1478	R	MT-567	777.127	1.91088
2866607	NC_000962.3	G	A	15887.8	1169	56.67	2.184	5.979	674	494	1168	R	MT-3787	609.73	1.91724
2866607	NC_000962.3	G	A	20767.8	1500	56.4	5.913	0	827	669	1496	R	MT-0718	814.878	1.84077
2866607	NC_000962.3	G	A	18158.8	1309	56.25	3.155	1.101	718	590	1308	R	MT-2474	619.076	2.11444
2866607	NC_000962.3	G	A	18443.8	1373	56.3	2.202	0	774	597	1371	R	MT-2356	630.417	2.17792
2866607	NC_000962.3	G	A	20092.8	1498	56.5	5.131	1.111	864	631	1495	R	MT-0080	858.628	1.74464
2866607	NC_000962.3	G	A	18965.8	1500	56.62	6.938	0	887	612	1499	R	MT-5195	800.645	1.87349
2866607	NC_000962.3	G	A	19686.8	1489	56.41	5.474	0	851	638	1489	R	MT-1206	707.427	2.10481
2866607	NC_000962.3	G	A	19369.8	1363	56.48	4.534	1.751	763	599	1362	R	MT-289	757.674	1.79893
2866607	NC_000962.3	G	A	19454.8	1442	56.48	3.523	3.236	801	640	1441	R	MT-504	665.023	2.16835
2866607	NC_000962.3	G	A	19761.8	1500	56.7	3.656	8.269	873	621	1494	R	MT-467	829.937	1.80737
2866657	NC_000962.3	G	A	29578.8	1238	56.95	9.448	4.587	366	872	1238	R	MT-5543	723.238	1.71175
2866657	NC_000962.3	G	A	18106.8	862	56.81	3.578	15.086	266	593	859	R	MT-2465	562.872	1.53143
2866657	NC_000962.3	G	A	29495.8	1250	56.7	8.479	3.595	366	883	1249	R	MT-1212	748.265	1.67053
2866657	NC_000962.3	G	A	20453.8	856	56.66	6.524	0.577	243	611	854	R	MT-6218	589.217	1.45278
2866657	NC_000962.3	G	A	24180.8	972	56.75	7.26	0.588	264	708	972	R	MT-3787	609.73	1.59415
2866657	NC_000962.3	G	A	27707.8	1210	56.43	6.935	5.443	382	828	1210	R	MT-2175	708.086	1.70883
2866657	NC_000962.3	G	A	27229.8	1113	57.01	6.482	1.247	306	806	1112	R	MT-5488	745.909	1.49214
2866657	NC_000962.3	G	A	37538.8	1493	56.83	5.938	5.88	394	1098	1492	R	MT-0712	929.442	1.60634
2866657	NC_000962.3	G	A	25610.8	1055	56.94	7.268	8.166	292	762	1054	R	MT-6084	570.377	1.84965
2866657	NC_000962.3	G	A	27513.8	1171	56.72	7.805	15.411	342	828	1170	R	MT-504	665.023	1.76084
2866657	NC_000962.3	G	A	30256.8	1228	57.04	7.661	8.191	329	899	1228	R	MT-1605	704.559	1.74293
2866657	NC_000962.3	G	A	31680.8	1247	56.88	7.255	1.28	320	924	1244	R	MT-3683	804.958	1.54915
2866657	NC_000962.3	G	A	22113.8	886	56.79	6.553	9.706	239	647	886	R	MT-6226	594.349	1.49071
2866657	NC_000962.3	G	A	35820.8	1430	56.96	7.513	8.365	376	1054	1430	R	MT-2151	952.498	1.50132
2866657	NC_000962.3	G	A	32182.8	1317	56.9	7.797	6.979	355	960	1315	R	MT-1103	724.505	1.81779
2866657	NC_000962.3	G	A	23353.8	969	56.68	5.728	3.615	276	692	968	R	78932	638.347	1.51798
2866657	NC_000962.3	G	A	31316.8	1206	57.05	8.036	1.278	308	897	1205	R	MT-1838	809.501	1.48981
2866657	NC_000962.3	G	A	34228.8	1446	56.71	7.62	9.222	425	1018	1443	R	MT-0718	814.878	1.7745
2866657	NC_000962.3	G	A	21471.8	870	57.09	7.23	8.402	235	635	870	R	MT-3173	585.845	1.48503
2866657	NC_000962.3	G	A	26493.8	1105	56.98	7.798	8.163	310	795	1105	R	MT-2174	619.613	1.78337
2866657	NC_000962.3	G	A	18910.8	761	57.53	6.485	8.519	196	565	761	R	MT-2665	424.731	1.79172
2866657	NC_000962.3	G	A	27748.8	1159	56.73	7.829	0.575	338	821	1159	R	73787	778.122	1.48948
2866657	NC_000962.3	G	A	28903.8	1231	56.76	7.079	17.377	349	882	1231	R	MT-3194	716.807	1.71734
2866657	NC_000962.3	G	A	28146.8	1113	56.86	6.987	0	301	812	1113	R	MT-0972	783.34	1.42084
2866657	NC_000962.3	G	A	28695.8	1158	57.05	5.727	16.646	292	865	1157	R	MT-2769	687.439	1.68451
2866657	NC_000962.3	G	A	29734.8	1205	57.06	6.188	4.66	329	876	1205	R	MT-1393	744.375	1.61881
2866657	NC_000962.3	G	A	32696.8	1305	56.95	7.341	8.291	349	956	1305	R	MT-5383	810.086	1.61094
2866657	NC_000962.3	G	A	28832.8	1157	56.82	8.218	2.824	325	831	1156	R	74856	795.746	1.45398
2866657	NC_000962.3	G	A	30070.8	1191	56.96	6.78	5.902	311	879	1190	R	MT-289	757.674	1.57192
2866657	NC_000962.3	G	A	23445.8	938	56.74	8.12	0.589	253	681	934	R	MT-2800	672.144	1.39553
2866657	NC_000962.3	G	A	29731.8	1225	56.85	8.491	5.679	348	876	1224	R	MT-389	674.259	1.81681
2866657	NC_000962.3	G	A	29537.8	1127	57.49	8.041	3.981	260	866	1126	R	MT-3271	654.699	1.7214
2866657	NC_000962.3	G	A	25357.8	1010	56.65	7.226	4.765	269	741	1010	R	MT-6429	657.841	1.53533
2866657	NC_000962.3	G	A	28630.8	1171	56.93	6.593	18.251	309	858	1167	R	MT-1684	680.222	1.7215
2866657	NC_000962.3	G	A	27380.8	1131	57.1	6.749	5.766	309	820	1129	R	MT-4942	684.058	1.65337
2866657	NC_000962.3	G	A	30156.8	1216	56.8	7.184	3.767	335	880	1215	R	MT-405	809.576	1.50202
2866657	NC_000962.3	G	A	25300.8	1052	56.72	8.951	10.787	304	745	1049	R	MT-1336	596.214	1.76447
2866657	NC_000962.3	G	A	32259.8	1343	56.86	7.902	3.621	384	959	1343	R	MT-4166	780.291	1.72115
2866657	NC_000962.3	G	A	24406.8	988	56.7	7.871	1.244	274	712	986	R	MT-3673	674.031	1.46581
2866657	NC_000962.3	G	A	27642.8	1165	56.6	5.859	19.009	344	821	1165	R	MT-2667	686.693	1.69654
2866657	NC_000962.3	G	A	25334.8	1004	56.87	5.299	12.633	271	731	1002	R	MT-3255	645.747	1.55479
2866657	NC_000962.3	G	A	33761.8	1371	56.82	8.405	0.58	390	979	1369	R	MT-4854	791.843	1.7314
2866657	NC_000962.3	G	A	30240.8	1225	56.64	6.835	3.695	342	882	1224	R	MT-2771	821.752	1.49072
2866657	NC_000962.3	G	A	26531.8	1062	57	7.946	3.76	284	776	1060	R	MT-5531	691.535	1.53571
2866657	NC_000962.3	G	A	33172.8	1298	57.06	7.62	2.057	331	966	1297	R	MT-0080	858.628	1.51171
2866657	NC_000962.3	G	A	28011.8	1152	56.96	7.628	11.066	318	833	1151	R	MT-2762	689.696	1.6703
2866657	NC_000962.3	G	A	26250.8	1109	56.5	5.279	1.241	319	788	1107	R	MT-2356	630.417	1.75915
2866657	NC_000962.3	G	A	29062.8	1214	56.68	6.82	5.64	345	868	1213	R	MT-2184	678.348	1.78964
2866657	NC_000962.3	G	A	30115.8	1205	56.62	7.924	8.123	339	862	1201	R	MT-5983	804.62	1.4976
2866657	NC_000962.3	G	A	24677.8	1026	57.1	6.901	10.956	282	743	1025	R	MT-578	721.183	1.42266
2866657	NC_000962.3	G	A	31888.8	1292	56.89	7.273	4.755	351	940	1291	R	MT-3341	795.415	1.62431
2866657	NC_000962.3	G	A	25623.8	1026	56.98	6.985	0.585	276	750	1026	R	68995	710.925	1.44319
2866657	NC_000962.3	G	A	22903.8	995	56.76	7.057	5.545	297	696	993	R	MT-1549	632.614	1.57284
2866657	NC_000962.3	G	A	24113.8	1016	56.86	5.385	13.926	286	730	1016	R	MT-2474	619.076	1.64116
2866657	NC_000962.3	G	A	28124.8	1112	56.86	8.777	5.883	300	812	1112	R	MT-2706	701.488	1.5852
2866657	NC_000962.3	G	A	32878.8	1372	57.04	5.618	20.281	362	1010	1372	R	MT-2473	793.868	1.72825
2866657	NC_000962.3	G	A	29108.8	1228	56.63	7.577	6.643	359	868	1227	R	MT-1206	707.427	1.73587
2866657	NC_000962.3	G	A	33584.8	1353	56.86	9.555	3.743	362	986	1348	R	MT-5195	800.645	1.68989
2866657	NC_000962.3	G	A	31419.8	1250	56.68	7.593	1.256	346	903	1249	R	MT-567	777.127	1.60849
2866657	NC_000962.3	G	A	25724.8	1126	56.78	7.279	10.53	338	786	1124	R	MT-2720	667.441	1.68704
2866657	NC_000962.3	G	A	31875.8	1301	56.87	7.63	0.583	367	932	1299	R	MT-1466	761.306	1.70891
2866657	NC_000962.3	G	A	33577.8	1373	56.64	7.968	10.851	398	975	1373	R	MT-467	829.937	1.65434
2866671	NC_000962.3	G	A	4560.77	837	56.91	-2.43	22.641	656	181	837	R	MT-6226	594.349	1.40826
2866671	NC_000962.3	G	A	5545.77	1043	56.83	-2	25.093	810	230	1040	R	MT-2667	686.693	1.51887
2866671	NC_000962.3	G	A	4416.77	904	57.06	-2.057	21.213	715	186	901	R	MT-2474	619.076	1.46024
2866671	NC_000962.3	G	A	2801.77	702	57.49	-2.326	13.511	573	128	701	R	MT-2665	424.731	1.65281
2866671	NC_000962.3	G	A	6318.77	1203	56.9	-3.192	1.362	948	254	1202	R	MT-1466	761.306	1.58018
2866671	NC_000962.3	G	A	5414.77	1111	56.89	-2.909	4.191	878	232	1110	R	MT-289	757.674	1.46633
2866671	NC_000962.3	G	A	6176.77	1216	57.16	-5.152	14.712	961	253	1214	R	MT-5383	810.086	1.50108
2866671	NC_000962.3	G	A	6276.77	1219	57	-2.618	10.893	958	260	1218	R	MT-4166	780.291	1.56224
2866671	NC_000962.3	G	A	4583.77	952	57.1	-2.897	9.549	754	197	951	R	MT-1336	596.214	1.59674
2866671	NC_000962.3	G	A	5209.77	1198	57.21	-2.715	1.452	967	228	1195	R	MT-5195	800.645	1.49629
2866671	NC_000962.3	G	A	4446.77	790	56.78	-1.375	26.417	602	188	790	R	MT-2465	562.872	1.40352
2866671	NC_000962.3	G	A	5951.77	1262	57.12	-1.125	32.792	1008	252	1260	R	MT-2473	793.868	1.58968
2866671	NC_000962.3	G	A	5475.77	1201	57.2	-4.102	2.306	962	237	1199	R	MT-0080	858.628	1.39874
2866671	NC_000962.3	G	A	6465.77	1142	56.7	-1.711	6.376	886	254	1140	R	MT-2771	821.752	1.38971
2866671	NC_000962.3	G	A	5220.77	1033	57.06	-2.938	3.114	812	221	1033	R	MT-5488	745.909	1.38489
2866671	NC_000962.3	G	A	5307.77	1094	57.06	-2.951	5.383	874	217	1091	R	MT-1838	809.501	1.35145
2866671	NC_000962.3	G	A	5203.77	1054	57	-1.353	2.262	840	214	1054	R	74856	795.746	1.32454
2866671	NC_000962.3	G	A	4124.77	875	57.09	-3.467	0	694	180	874	R	MT-2800	672.144	1.3018
2866671	NC_000962.3	G	A	5306.77	898	56.81	-3.787	13.86	689	207	896	R	MT-1549	632.614	1.41951
2866671	NC_000962.3	G	A	6045.77	1146	56.96	-3.372	3.151	895	246	1141	R	MT-567	777.127	1.47466
2866671	NC_000962.3	G	A	5355.77	1123	57.2	-3.031	6.486	887	233	1120	R	MT-389	674.259	1.66553
2866671	NC_000962.3	G	A	4456.77	985	57.2	-3.837	15.014	783	201	984	R	MT-2174	619.613	1.5897
2866671	NC_000962.3	G	A	7298.77	1314	56.79	-4.11	14.26	1016	297	1313	R	MT-0718	814.878	1.61251
2866671	NC_000962.3	G	A	5442.77	1136	57.38	-2.862	4.258	905	228	1133	R	MT-5543	723.238	1.57071
2866671	NC_000962.3	G	A	5608.77	1123	57.21	-4.422	9.534	889	231	1120	R	MT-1605	704.559	1.5939
2866671	NC_000962.3	G	A	4570.77	936	57.05	-1.085	26.929	744	192	936	R	MT-578	721.183	1.29787
2866671	NC_000962.3	G	A	6493.77	1323	57.01	-3.087	11.113	1045	274	1319	R	MT-2151	952.498	1.38898
2866671	NC_000962.3	G	A	6055.77	1105	56.93	-2.439	11.147	859	241	1100	R	MT-405	809.576	1.36491
2866671	NC_000962.3	G	A	4520.77	923	56.91	-2.127	12.98	737	186	923	R	MT-6429	657.841	1.40307
2866671	NC_000962.3	G	A	5871.77	1073	56.72	-2.855	4.042	832	239	1071	R	73787	778.122	1.37896
2866671	NC_000962.3	G	A	4506.77	986	57.14	-2.856	5.516	792	193	985	R	MT-5531	691.535	1.42581
2866671	NC_000962.3	G	A	5713.77	1032	56.84	-2.929	19.943	799	230	1029	R	MT-504	665.023	1.55183
2866671	NC_000962.3	G	A	5402.77	999	56.92	-4.119	19.979	776	223	999	R	MT-2720	667.441	1.49676
2866671	NC_000962.3	G	A	6235.77	1218	57.13	-4.999	9.437	961	256	1217	R	MT-1103	724.505	1.68115
2866671	NC_000962.3	G	A	6191.77	1246	57.1	-4.125	3.223	987	257	1244	R	MT-4854	791.843	1.57354
2866671	NC_000962.3	G	A	3709.77	743	56.79	-1.872	2.155	580	161	741	R	MT-6218	589.217	1.261
2866671	NC_000962.3	G	A	4902.77	1020	57.11	-3.5	8	809	209	1018	R	MT-4942	684.058	1.4911
2866671	NC_000962.3	G	A	4557.77	955	57.17	-3.279	14.821	760	194	954	R	MT-6084	570.377	1.67433
2866671	NC_000962.3	G	A	6090.77	1135	56.82	-2.656	9.137	884	250	1134	R	MT-1206	707.427	1.60441
2866671	NC_000962.3	G	A	2968.77	755	57.42	-3.317	10.155	613	141	754	R	MT-3173	585.845	1.28874
2866671	NC_000962.3	G	A	7630.77	1404	56.94	-2.234	11.137	1097	305	1402	R	MT-0712	929.442	1.51058
2866671	NC_000962.3	G	A	5504.77	1114	57.01	-3.671	23.558	877	235	1112	R	MT-3194	716.807	1.55411
2866671	NC_000962.3	G	A	4496.77	965	57.22	-1.335	1.435	768	195	963	R	68995	710.925	1.35739
2866671	NC_000962.3	G	A	4514.77	892	56.99	-0.799	14.621	707	185	892	R	MT-3255	645.747	1.38135
2866671	NC_000962.3	G	A	4755.77	1055	57.03	-2.232	24.039	841	212	1053	R	MT-1684	680.222	1.55096
2866671	NC_000962.3	G	A	4801.77	880	56.77	-2.657	5.141	681	195	876	R	78932	638.347	1.37856
2866671	NC_000962.3	G	A	6131.77	1103	56.77	-2.237	14.304	859	241	1100	R	MT-5983	804.62	1.37083
2866671	NC_000962.3	G	A	5533.77	1144	56.96	-3.51	3.148	898	242	1140	R	MT-1212	748.265	1.52887
2866671	NC_000962.3	G	A	5311.77	1028	57.15	-3.252	12.666	812	213	1025	R	MT-2762	689.696	1.49051
2866671	NC_000962.3	G	A	5470.77	1013	56.9	-3.964	0.644	794	219	1013	R	MT-0972	783.34	1.29318
2866671	NC_000962.3	G	A	6790.77	1130	56.48	-1.584	13.603	858	269	1127	R	MT-2175	708.086	1.59585
2866671	NC_000962.3	G	A	5833.77	1009	56.54	-2.064	3.952	773	234	1007	R	MT-2356	630.417	1.60053
2866671	NC_000962.3	G	A	3603.77	1046	57.73	-5.007	3.555	866	177	1043	R	MT-3271	654.699	1.59768
2866671	NC_000962.3	G	A	5480.77	1089	56.91	-0.918	7.97	858	231	1089	R	MT-2184	678.348	1.60537
2866671	NC_000962.3	G	A	7288.77	1249	56.73	-3.602	15.846	957	292	1249	R	MT-467	829.937	1.50493
2866671	NC_000962.3	G	A	5103.77	1018	56.95	-2.486	6.7	808	209	1017	R	MT-2706	701.488	1.4512
2866671	NC_000962.3	G	A	6120.77	1187	57.07	-2.735	5.345	937	250	1187	R	MT-3341	795.415	1.4923
2866671	NC_000962.3	G	A	5539.77	1110	57.3	-2.299	8	883	225	1108	R	MT-1393	744.375	1.49118
2866671	NC_000962.3	G	A	4820.77	915	56.81	-3.933	3.075	712	202	914	R	MT-3673	674.031	1.3575
2866671	NC_000962.3	G	A	5486.77	1161	57.03	-2.651	3.241	929	230	1159	R	MT-3683	804.958	1.44231
2866671	NC_000962.3	G	A	4532.77	893	56.88	-2.884	0.65	703	190	893	R	MT-3787	609.73	1.46458
2866671	NC_000962.3	G	A	4426.77	1037	57.3	-2.237	20.247	841	195	1036	R	MT-2769	687.439	1.5085
2866677	NC_000962.3	A	C	3540.77	1088	57.43	1.356	11.101	912	175	1087	M	MT-5543	723.238	1.50435
2866677	NC_000962.3	A	C	4890.77	1177	57.13	1.69	14.017	966	211	1177	M	MT-4166	780.291	1.50841
2866677	NC_000962.3	A	C	2691.77	712	56.95	1.737	7.208	582	130	712	M	MT-6218	589.217	1.20838
2866677	NC_000962.3	A	C	4303.77	1180	57.26	-0.554	8.96	978	202	1180	M	MT-5383	810.086	1.45664
2866677	NC_000962.3	A	C	4510.77	1072	56.74	1.642	7.034	869	202	1071	M	MT-5983	804.62	1.33231
2866677	NC_000962.3	A	C	3692.77	1015	57.15	1.864	12.548	838	176	1014	M	MT-5488	745.909	1.36076
2866677	NC_000962.3	A	C	3688.77	900	57.04	1.246	10.154	737	163	900	M	MT-3673	674.031	1.33525
2866677	NC_000962.3	A	C	1851.77	740	57.49	0.727	2.634	629	111	740	M	MT-3173	585.845	1.26313
2866677	NC_000962.3	A	C	3585.77	865	56.94	1.141	11.893	706	159	865	M	78932	638.347	1.35506
2866677	NC_000962.3	A	C	4189.77	1102	57.12	3.035	18.345	910	191	1101	M	MT-1206	707.427	1.55776
2866677	NC_000962.3	A	C	4375.77	1227	57.33	-0.007	0.719	1017	208	1225	M	MT-4854	791.843	1.54955
2866677	NC_000962.3	A	C	4546.77	962	56.61	1.572	9.729	769	193	962	M	MT-2356	630.417	1.52597
2866677	NC_000962.3	A	C	5510.77	1364	57	2.574	4.599	1112	252	1364	M	MT-0712	929.442	1.46755
2866677	NC_000962.3	A	C	4048.77	1101	57.4	-0.288	16.756	917	184	1101	M	MT-1605	704.559	1.56268
2866677	NC_000962.3	A	C	3150.77	951	57.32	2.549	3.603	791	157	948	M	68995	710.925	1.33769
2866677	NC_000962.3	A	C	3357.77	827	56.94	1.193	15.723	671	156	827	M	MT-6226	594.349	1.39144
2866677	NC_000962.3	A	C	3312.77	753	57.07	2.281	45.471	613	140	753	M	MT-2465	562.872	1.33778
2866677	NC_000962.3	A	C	3657.77	870	56.94	1.165	0.686	710	160	870	M	MT-3787	609.73	1.42686
2866677	NC_000962.3	A	C	4173.77	1007	57.06	0.997	42.325	821	185	1006	M	MT-2667	686.693	1.46645
2866677	NC_000962.3	A	C	3787.77	1113	57.26	2.101	8.975	926	187	1113	M	MT-1212	748.265	1.48744
2866677	NC_000962.3	A	C	3763.77	920	57	0.696	10.388	752	168	920	M	MT-6429	657.841	1.39851
2866677	NC_000962.3	A	C	3640.77	1047	57.21	3.435	0.714	868	179	1047	M	74856	795.746	1.31575
2866677	NC_000962.3	A	C	3504.77	936	57.27	-0.17	21.09	772	164	936	M	MT-6084	570.377	1.64102
2866677	NC_000962.3	A	C	3012.77	888	57.36	1.877	25.419	739	147	886	M	MT-2474	619.076	1.4344
2866677	NC_000962.3	A	C	4941.77	1291	57.19	2.11	16.303	1064	227	1291	M	MT-2151	952.498	1.35538
2866677	NC_000962.3	A	C	5570.77	1222	56.75	0.955	9.575	978	243	1221	M	MT-467	829.937	1.4724
2866677	NC_000962.3	A	C	3302.77	950	57.4	0.815	24.542	794	156	950	M	MT-2174	619.613	1.53322
2866677	NC_000962.3	A	C	4003.77	992	56.99	1.771	4.533	813	179	992	M	MT-2706	701.488	1.41414
2866677	NC_000962.3	A	C	1874.77	686	57.6	2.126	35.291	587	98	685	M	MT-2665	424.731	1.61514
2866677	NC_000962.3	A	C	5398.77	1271	57.07	0.938	24.982	1037	232	1269	M	MT-0718	814.878	1.55974
2866677	NC_000962.3	A	C	4545.77	1161	57.16	1.692	1.493	955	206	1161	M	MT-3341	795.415	1.45962
2866677	NC_000962.3	A	C	3978.77	875	57	0.404	22.38	710	165	875	M	MT-1549	632.614	1.38315
2866677	NC_000962.3	A	C	4609.77	1005	56.87	0.933	24.113	808	197	1005	M	MT-504	665.023	1.51123
2866677	NC_000962.3	A	C	3597.77	966	57.28	1.017	16.756	804	162	966	M	MT-4942	684.058	1.41216
2866677	NC_000962.3	A	C	3902.77	1073	57.12	0.956	2.46	887	186	1073	M	MT-1838	809.501	1.32551
2866677	NC_000962.3	A	C	5302.77	1087	56.65	2.447	26.741	866	220	1086	M	MT-2175	708.086	1.53512
2866677	NC_000962.3	A	C	4073.77	1079	57.32	1.739	14.491	895	184	1079	M	MT-389	674.259	1.60028
2866677	NC_000962.3	A	C	3840.77	920	57.08	2.737	45.4	753	167	920	M	MT-578	721.183	1.27568
2866677	NC_000962.3	A	C	4689.77	1173	57.09	0.555	2.362	959	214	1173	M	MT-1466	761.306	1.54077
2866677	NC_000962.3	A	C	4178.77	1145	57.1	1.188	0	950	195	1145	M	MT-3683	804.958	1.42243
2866677	NC_000962.3	A	C	3318.77	874	57.01	2.752	8.838	717	157	874	M	MT-3255	645.747	1.35347
2866677	NC_000962.3	A	C	3124.77	914	57.26	2.355	19.49	762	152	914	M	MT-1336	596.214	1.53301
2866677	NC_000962.3	A	C	4842.77	1067	56.88	-0.275	6.983	854	210	1064	M	MT-405	809.576	1.31797
2866677	NC_000962.3	A	C	4714.77	1068	56.84	1.484	6.896	866	202	1068	M	73787	778.122	1.37254
2866677	NC_000962.3	A	C	3706.77	1007	57.37	2.258	19.198	841	166	1007	M	MT-2762	689.696	1.46006
2866677	NC_000962.3	A	C	3762.77	1027	57.32	1.64	37.1	854	173	1027	M	MT-1684	680.222	1.5098
2866677	NC_000962.3	A	C	4658.77	1206	57.33	2.492	36.583	999	207	1206	M	MT-2473	793.868	1.51914
2866677	NC_000962.3	A	C	4250.77	1186	57.34	1.677	3.553	989	197	1186	M	MT-5195	800.645	1.48131
2866677	NC_000962.3	A	C	2999.77	858	57.19	0.956	1.512	710	148	858	M	MT-2800	672.144	1.27651
2866677	NC_000962.3	A	C	3391.77	959	57.24	1.165	2.472	802	157	959	M	MT-5531	691.535	1.38677
2866677	NC_000962.3	A	C	4109.77	1014	57.05	0.184	3.355	826	188	1014	M	MT-0972	783.34	1.29446
2866677	NC_000962.3	A	C	4362.77	1184	57.3	-0.721	0.71	981	203	1184	M	MT-0080	858.628	1.37894
2866677	NC_000962.3	A	C	2368.77	1002	57.82	-0.698	6.821	866	136	1002	M	MT-3271	654.699	1.53047
2866677	NC_000962.3	A	C	4118.77	973	57.17	-0.754	30.624	794	179	973	M	MT-2720	667.441	1.45781
2866677	NC_000962.3	A	C	3805.77	1055	57.29	1.365	14.878	878	176	1054	M	MT-1393	744.375	1.4173
2866677	NC_000962.3	A	C	4614.77	1062	57.03	2.447	13.617	864	198	1062	M	MT-2184	678.348	1.56557
2866677	NC_000962.3	A	C	5174.77	1140	56.8	1.425	4.43	916	224	1140	M	MT-2771	821.752	1.38728
2866677	NC_000962.3	A	C	4251.77	1174	57.37	-0.111	14.539	978	196	1174	M	MT-1103	724.505	1.62042
2866677	NC_000962.3	A	C	3258.77	1002	57.5	0.956	28.973	845	157	1002	M	MT-2769	687.439	1.45758
2866677	NC_000962.3	A	C	4501.77	1094	57.27	-0.84	28.915	898	196	1094	M	MT-3194	716.807	1.52621
2866677	NC_000962.3	A	C	4628.77	1118	57.05	0.226	0	909	207	1116	M	MT-567	777.127	1.43863
2866677	NC_000962.3	A	C	4254.77	1086	57.05	1.614	2.392	892	193	1085	M	MT-289	757.674	1.43333
2866876	NC_000962.3	A	G	7179.77	1096	59.66	-5.202	2.077	828	265	1093	R	MT-1336	596.214	1.83827
2866876	NC_000962.3	A	G	9108.77	1165	59.73	-6.062	0.593	847	316	1163	R	MT-1393	744.375	1.56507
2866876	NC_000962.3	A	G	10058.8	1291	59.72	-7.368	1.261	950	341	1291	R	MT-5195	800.645	1.61245
2866876	NC_000962.3	A	G	7127.77	1071	59.76	-6.372	0	810	256	1066	R	MT-5383	810.086	1.32208
2866876	NC_000962.3	A	G	8970.77	1185	59.72	-5.517	1.266	873	311	1184	R	MT-2762	689.696	1.71815
2866876	NC_000962.3	A	G	8614.77	1125	59.74	-5.674	0	826	296	1122	R	MT-2720	667.441	1.68554
2866876	NC_000962.3	A	G	8109.77	999	59.7	-5.122	0	718	280	998	R	MT-5488	745.909	1.33931
2866876	NC_000962.3	A	G	9577.77	1206	59.61	-4.894	0	870	334	1204	R	MT-0712	929.442	1.29755
2866876	NC_000962.3	A	G	8002.77	1101	59.73	-5.864	0	816	282	1098	R	MT-2174	619.613	1.77692
2866876	NC_000962.3	A	G	6805.77	922	59.71	-6.451	0	676	242	918	R	MT-5531	691.535	1.33327
2866876	NC_000962.3	A	G	6730.77	927	59.71	-7.135	1.272	690	236	926	R	MT-3787	609.73	1.52035
2866876	NC_000962.3	A	G	8136.77	1242	59.69	-5.436	0	939	303	1242	R	MT-5543	723.238	1.71728
2866876	NC_000962.3	A	G	10359.8	1265	59.6	-6.142	0	914	350	1264	R	MT-1212	748.265	1.69058
2866876	NC_000962.3	A	G	8993.77	1198	59.77	-4.661	0	884	313	1197	R	MT-2175	708.086	1.69188
2866876	NC_000962.3	A	G	9298.77	1034	59.7	-6.385	0.57	721	311	1032	R	MT-567	777.127	1.33054
2866876	NC_000962.3	A	G	8692.77	1205	59.55	-5.906	0.599	895	309	1204	R	MT-389	674.259	1.78715
2866876	NC_000962.3	A	G	7548.77	947	59.74	-5.757	0	688	255	943	R	MT-1549	632.614	1.49696
2866876	NC_000962.3	A	G	8192.77	1102	59.77	-5.445	0	814	286	1100	R	MT-467	829.937	1.32781
2866876	NC_000962.3	A	G	8644.77	1105	59.53	-4.605	1.247	802	301	1103	R	MT-3683	804.958	1.37274
2866876	NC_000962.3	A	G	8015.77	1051	59.7	-4.506	0	769	280	1049	R	73787	778.122	1.35069
2866876	NC_000962.3	A	G	8095.77	1049	59.67	-5.155	1.994	767	280	1047	R	MT-289	757.674	1.3845
2866876	NC_000962.3	A	G	8831.77	1049	59.72	-4.846	4.595	745	303	1048	R	MT-5983	804.62	1.30372
2866876	NC_000962.3	A	G	9546.77	1188	59.49	-5.406	1.251	861	325	1186	R	MT-1466	761.306	1.56048
2866876	NC_000962.3	A	G	7059.77	1043	59.68	-5.626	0	787	252	1039	R	MT-2771	821.752	1.26924
2866876	NC_000962.3	A	G	7106.77	1062	59.83	-5.844	0	795	266	1061	R	MT-2474	619.076	1.71546
2866876	NC_000962.3	A	G	9161.77	1368	59.84	-6.549	2.104	1039	328	1367	R	MT-2473	793.868	1.72321
2866876	NC_000962.3	A	G	9157.77	1214	59.81	-5.527	2.025	895	317	1212	R	MT-3194	716.807	1.69362
2866876	NC_000962.3	A	G	7242.77	1198	59.77	-5.279	2.144	926	269	1195	R	MT-1684	680.222	1.76119
2866876	NC_000962.3	A	G	4487.77	810	59.61	-3.68	0	630	180	810	R	MT-3173	585.845	1.38262
2866876	NC_000962.3	A	G	4836.77	711	59.81	-4.506	0	532	177	709	R	MT-2665	424.731	1.674
2866876	NC_000962.3	A	G	9062.77	1211	59.73	-5.913	1.261	894	316	1210	R	MT-2184	678.348	1.78522
2866876	NC_000962.3	A	G	9041.77	1216	59.69	-5.834	2.032	894	319	1213	R	MT-4854	791.843	1.53566
2866876	NC_000962.3	A	G	8184.77	1020	59.82	-5.976	1.979	739	280	1019	R	74856	795.746	1.28182
2866876	NC_000962.3	A	G	7479.77	1101	59.61	-6.005	2.078	826	273	1099	R	MT-2356	630.417	1.74646
2866876	NC_000962.3	A	G	7254.77	1067	59.73	-6.192	0.611	804	259	1063	R	MT-405	809.576	1.31797
2866876	NC_000962.3	A	G	7627.77	1000	59.71	-4.999	0.595	734	266	1000	R	MT-1838	809.501	1.23533
2866876	NC_000962.3	A	G	8109.77	1044	59.69	-4.916	1.977	758	283	1041	R	MT-0972	783.34	1.33275
2866876	NC_000962.3	A	G	7358.77	1162	59.8	-4.215	0.623	887	272	1159	R	MT-2667	686.693	1.69217
2866876	NC_000962.3	A	G	7502.77	1090	59.75	-5.14	7.396	820	266	1086	R	MT-3271	654.699	1.66489
2866876	NC_000962.3	A	G	7606.77	892	59.75	-5.625	1.225	636	253	889	R	MT-3673	674.031	1.32338
2866876	NC_000962.3	A	G	8489.77	1167	59.78	-6.573	1.264	858	304	1162	R	MT-4942	684.058	1.706
2866876	NC_000962.3	A	G	7378.77	1080	59.72	-5.865	0.611	811	267	1078	R	MT-504	665.023	1.624
2866876	NC_000962.3	A	G	11188.8	1455	59.65	-6.301	1.262	1068	386	1454	R	MT-2151	952.498	1.52756
2866876	NC_000962.3	A	G	5271.77	783	59.77	-4.574	2.078	585	195	780	R	MT-6218	589.217	1.32888
2866876	NC_000962.3	A	G	6068.77	797	59.58	-3.689	0.593	584	213	797	R	MT-3255	645.747	1.23423
2866876	NC_000962.3	A	G	7829.77	945	59.68	-5.955	1.964	675	269	944	R	MT-578	721.183	1.31035
2866876	NC_000962.3	A	G	10039.8	1376	59.67	-5.956	0	1024	350	1374	R	MT-4166	780.291	1.76344
2866876	NC_000962.3	A	G	8576.77	1210	59.63	-6.083	0	896	308	1204	R	MT-0080	858.628	1.40922
2866876	NC_000962.3	A	G	8196.77	968	59.63	-5.609	1.236	689	278	967	R	MT-6084	570.377	1.69712
2866876	NC_000962.3	A	G	6203.77	785	59.56	-4.781	1.987	565	220	785	R	MT-6226	594.349	1.32077
2866876	NC_000962.3	A	G	5955.77	871	59.66	-5.873	0.613	658	212	870	R	MT-6429	657.841	1.32403
2866876	NC_000962.3	A	G	10161.8	1277	59.68	-5.651	1.241	925	352	1277	R	MT-1605	704.559	1.81248
2866876	NC_000962.3	A	G	8850.77	1252	59.74	-4.833	2.892	932	318	1250	R	MT-1103	724.505	1.72808
2866876	NC_000962.3	A	G	8097.77	987	59.8	-5.239	1.944	703	282	985	R	MT-2465	562.872	1.75351
2866876	NC_000962.3	A	G	10386.8	1427	59.64	-6.324	0.599	1055	367	1422	R	MT-0718	814.878	1.75118
2866876	NC_000962.3	A	G	7981.77	929	59.73	-4.658	2.755	656	272	928	R	68995	710.925	1.30675
2866876	NC_000962.3	A	G	7106.77	990	59.55	-3.069	1.264	735	253	988	R	MT-2706	701.488	1.41129
2866876	NC_000962.3	A	G	9216.77	1180	59.73	-7.283	0	856	321	1177	R	MT-1206	707.427	1.66802
2866876	NC_000962.3	A	G	6840.77	825	59.64	-5.589	0.581	590	234	824	R	MT-2800	672.144	1.22742
2866876	NC_000962.3	A	G	9178.77	1124	59.8	-6.835	0.583	812	311	1123	R	MT-2769	687.439	1.63505
2866876	NC_000962.3	A	G	8224.77	1139	59.76	-5.425	0.598	841	294	1135	R	MT-3341	795.415	1.43196
2866876	NC_000962.3	A	G	6624.77	915	59.71	-4.629	0.594	669	245	914	R	78932	638.347	1.43339
2866880	NC_000962.3	C	T	8366.77	1046	59.65	-1.477	1.988	757	289	1046	Y	MT-289	757.674	1.38054
2866880	NC_000962.3	C	T	8001.77	995	59.71	-0.876	0	719	274	993	Y	MT-1838	809.501	1.22915
2866880	NC_000962.3	C	T	10174.8	1304	59.71	-2.083	1.258	942	355	1297	Y	MT-5195	800.645	1.62869
2866880	NC_000962.3	C	T	10611.8	1264	59.66	-1.883	0.58	900	364	1264	Y	MT-1605	704.559	1.79403
2866880	NC_000962.3	C	T	6001.77	869	59.65	-2.558	0	647	219	866	Y	MT-6429	657.841	1.32099
2866880	NC_000962.3	C	T	6763.77	917	59.71	-3.612	1.281	674	242	916	Y	MT-3787	609.73	1.50394
2866880	NC_000962.3	C	T	9135.77	1193	59.72	-2.173	0.589	866	326	1192	Y	MT-2184	678.348	1.75868
2866880	NC_000962.3	C	T	6109.77	780	59.56	-1.081	3.626	553	227	780	Y	MT-6226	594.349	1.31236
2866880	NC_000962.3	C	T	9174.77	1223	59.8	-1.679	1.251	889	332	1221	Y	MT-3194	716.807	1.70618
2866880	NC_000962.3	C	T	8231.77	981	59.69	-1.977	0.575	693	286	979	Y	MT-5488	745.909	1.31517
2866880	NC_000962.3	C	T	10262.8	1361	59.67	-2.454	0	997	359	1356	Y	MT-4166	780.291	1.74422
2866880	NC_000962.3	C	T	9320.77	1176	59.47	-1.717	1.245	842	334	1176	Y	MT-1466	761.306	1.54471
2866880	NC_000962.3	C	T	8260.77	1020	59.68	-1.821	1.236	729	290	1019	Y	MT-0972	783.34	1.30212
2866880	NC_000962.3	C	T	5225.77	713	59.81	-1.049	0	526	184	710	Y	MT-2665	424.731	1.67871
2866880	NC_000962.3	C	T	7044.77	920	59.71	-3.236	0	669	250	919	Y	MT-5531	691.535	1.33037
2866880	NC_000962.3	C	T	9232.77	1185	59.71	-1.964	1.251	860	323	1183	Y	MT-2762	689.696	1.71815
2866880	NC_000962.3	C	T	7351.77	1053	59.73	-2.24	0.612	785	266	1051	Y	MT-405	809.576	1.30068
2866880	NC_000962.3	C	T	10623.8	1266	59.59	-1.659	0	900	363	1263	Y	MT-1212	748.265	1.69191
2866880	NC_000962.3	C	T	7504.77	1186	59.76	-2.11	2.967	905	279	1184	Y	MT-1684	680.222	1.74355
2866880	NC_000962.3	C	T	7956.77	937	59.67	-2.805	2.714	665	271	936	Y	MT-578	721.183	1.29925
2866880	NC_000962.3	C	T	8493.77	1035	59.7	-1.502	0.578	745	289	1034	Y	73787	778.122	1.33013
2866880	NC_000962.3	C	T	9493.77	1207	59.68	-1.153	2.798	868	335	1203	Y	MT-4854	791.843	1.52429
2866880	NC_000962.3	C	T	8887.77	1180	59.76	-1.076	0	860	320	1180	Y	MT-2175	708.086	1.66646
2866880	NC_000962.3	C	T	8493.77	1019	59.81	-2.44	1.933	726	290	1016	Y	74856	795.746	1.28056
2866880	NC_000962.3	C	T	9393.77	1121	59.79	-2.785	0.584	797	319	1116	Y	MT-2769	687.439	1.63069
2866880	NC_000962.3	C	T	9162.77	1091	59.52	-2.094	1.225	772	317	1089	Y	MT-3683	804.958	1.35535
2866880	NC_000962.3	C	T	7136.77	1034	59.68	-1.996	0	771	260	1031	Y	MT-2771	821.752	1.25829
2866880	NC_000962.3	C	T	6185.77	793	59.57	0.161	0	573	218	791	Y	MT-3255	645.747	1.22804
2866880	NC_000962.3	C	T	5324.77	772	59.77	-0.349	4.839	570	199	769	Y	MT-6218	589.217	1.31021
2866880	NC_000962.3	C	T	7774.77	1087	59.71	-2.824	0	806	279	1085	Y	MT-504	665.023	1.63453
2866880	NC_000962.3	C	T	9339.77	1161	59.73	-2.018	1.249	836	323	1159	Y	MT-1393	744.375	1.5597
2866880	NC_000962.3	C	T	9648.77	1371	59.84	-2.235	1.3	1030	340	1370	Y	MT-2473	793.868	1.72699
2866880	NC_000962.3	C	T	9333.77	1183	59.6	-0.842	0.584	847	334	1181	Y	MT-0712	929.442	1.27281
2866880	NC_000962.3	C	T	7441.77	1053	59.83	-2.315	0.596	778	270	1048	Y	MT-2474	619.076	1.70092
2866880	NC_000962.3	C	T	8917.77	1035	59.71	-1.388	3.567	727	308	1035	Y	MT-5983	804.62	1.28632
2866880	NC_000962.3	C	T	11098.8	1418	59.63	-2.093	0	1032	383	1415	Y	MT-0718	814.878	1.74014
2866880	NC_000962.3	C	T	8982.77	1155	59.78	-2.922	0.585	835	317	1152	Y	MT-4942	684.058	1.68845
2866880	NC_000962.3	C	T	8663.77	1124	59.73	-1.711	0.592	820	302	1122	Y	MT-3341	795.415	1.4131
2866880	NC_000962.3	C	T	8911.77	1188	59.53	-1.775	0.597	868	316	1184	Y	MT-389	674.259	1.76193
2866880	NC_000962.3	C	T	11410.8	1446	59.63	-2.299	1.251	1049	396	1445	Y	MT-2151	952.498	1.51811
2866880	NC_000962.3	C	T	8246.77	1097	59.7	-2.051	0.597	808	288	1096	Y	MT-2174	619.613	1.77046
2866880	NC_000962.3	C	T	7455.77	972	59.53	0.106	0	706	264	970	Y	MT-2706	701.488	1.38563
2866880	NC_000962.3	C	T	7552.77	944	59.73	-1.882	0	677	264	941	Y	MT-1549	632.614	1.49222
2866880	NC_000962.3	C	T	7859.77	1103	59.59	-2.373	2.032	815	286	1101	Y	MT-2356	630.417	1.74964
2866880	NC_000962.3	C	T	7604.77	890	59.75	-2.339	1.936	629	261	890	Y	MT-3673	674.031	1.32041
2866880	NC_000962.3	C	T	7697.77	1071	59.75	-1.353	6.083	798	270	1068	Y	MT-3271	654.699	1.63587
2866880	NC_000962.3	C	T	9155.77	1038	59.68	-2.26	0.57	718	317	1035	Y	MT-567	777.127	1.33569
2866880	NC_000962.3	C	T	8259.77	1089	59.76	-1.349	0	794	295	1089	Y	MT-467	829.937	1.31215
2866880	NC_000962.3	C	T	6953.77	814	59.62	-3.412	0	570	244	814	Y	MT-2800	672.144	1.21105
2866880	NC_000962.3	C	T	8379.77	987	59.8	-1.535	1.215	693	294	987	Y	MT-2465	562.872	1.75351
2866880	NC_000962.3	C	T	9290.77	1245	59.73	-0.977	2.877	918	325	1243	Y	MT-1103	724.505	1.71841
2866880	NC_000962.3	C	T	7484.77	1087	59.64	-1.946	1.288	807	277	1084	Y	MT-1336	596.214	1.82317
2866880	NC_000962.3	C	T	7201.77	1049	59.75	-3.314	0	784	264	1048	Y	MT-5383	810.086	1.29492
2866880	NC_000962.3	C	T	7812.77	1158	59.78	-0.305	0	875	281	1156	Y	MT-2667	686.693	1.68634
2866880	NC_000962.3	C	T	7069.77	903	59.7	-0.33	0.589	657	246	903	Y	78932	638.347	1.41459
2866880	NC_000962.3	C	T	8714.77	1124	59.71	-1.801	0	818	304	1122	Y	MT-2720	667.441	1.68404
2866880	NC_000962.3	C	T	8576.77	1233	59.66	-1.864	0	911	317	1228	Y	MT-5543	723.238	1.70483
2866880	NC_000962.3	C	T	8458.77	951	59.6	-2.594	0.563	661	288	949	Y	MT-6084	570.377	1.66732
2866880	NC_000962.3	C	T	8417.77	917	59.73	-1.236	2.691	637	279	916	Y	68995	710.925	1.28987
2866880	NC_000962.3	C	T	9953.77	1193	59.71	-3.301	0	847	340	1187	Y	MT-1206	707.427	1.68639
2866880	NC_000962.3	C	T	4717.77	791	59.59	-1.317	0	605	184	789	Y	MT-3173	585.845	1.35019
2866880	NC_000962.3	C	T	8730.77	1183	59.61	-2.783	0	867	313	1180	Y	MT-0080	858.628	1.37778
2866882	NC_000962.3	G	A	7759.77	984	59.53	0.446	0	701	280	981	R	MT-2706	701.488	1.40273
2866882	NC_000962.3	G	A	9677.77	1203	59.71	-1.559	1.236	857	342	1199	R	MT-2184	678.348	1.77343
2866882	NC_000962.3	G	A	11688.8	1430	59.63	-1.358	0	1022	403	1425	R	MT-0718	814.878	1.75486
2866882	NC_000962.3	G	A	8811.77	955	59.58	-2.018	1.193	651	303	954	R	MT-6084	570.377	1.67433
2866882	NC_000962.3	G	A	7985.77	1088	59.64	-1.075	2.015	796	289	1085	R	MT-1336	596.214	1.82485
2866882	NC_000962.3	G	A	9142.77	1193	59.61	-2.158	0	861	330	1191	R	MT-0080	858.628	1.38943
2866882	NC_000962.3	G	A	7771.77	1058	59.73	-1.761	0	776	280	1056	R	MT-405	809.576	1.30686
2866882	NC_000962.3	G	A	9794.77	1174	59.7	-1.748	1.225	832	339	1171	R	MT-2762	689.696	1.7022
2866882	NC_000962.3	G	A	9660.77	1161	59.77	-1.664	1.217	830	329	1159	R	MT-4942	684.058	1.69722
2866882	NC_000962.3	G	A	10340.8	1313	59.7	-0.725	0	943	367	1310	R	MT-5195	800.645	1.63993
2866882	NC_000962.3	G	A	6432.77	878	59.64	-1.896	0	644	232	876	R	MT-6429	657.841	1.33467
2866882	NC_000962.3	G	A	9300.77	1048	59.68	-0.585	3.546	724	323	1047	R	MT-5983	804.62	1.30248
2866882	NC_000962.3	G	A	9779.77	1140	59.79	-1.528	1.223	806	334	1140	R	MT-2769	687.439	1.65833
2866882	NC_000962.3	G	A	8233.77	1083	59.74	-1.19	8.338	788	290	1078	R	MT-3271	654.699	1.6542
2866882	NC_000962.3	G	A	8716.77	1046	59.7	-0.818	0	745	301	1046	R	73787	778.122	1.34426
2866882	NC_000962.3	G	A	8391.77	923	59.72	0.076	2.687	635	287	922	R	68995	710.925	1.29831
2866882	NC_000962.3	G	A	8392.77	1106	59.59	-1.712	1.267	805	300	1105	R	MT-2356	630.417	1.75439
2866882	NC_000962.3	G	A	8588.77	952	59.64	-1.767	3.55	666	283	949	R	MT-578	721.183	1.32005
2866882	NC_000962.3	G	A	9936.77	1181	59.73	-0.832	1.225	841	339	1180	R	MT-1393	744.375	1.58657
2866882	NC_000962.3	G	A	8462.77	1100	59.7	-0.978	0	797	297	1094	R	MT-2174	619.613	1.7753
2866882	NC_000962.3	G	A	8219.77	992	59.68	-0.111	0	706	285	991	R	MT-1838	809.501	1.22545
2866882	NC_000962.3	G	A	11001.8	1276	59.65	-1.863	0	890	384	1274	R	MT-1605	704.559	1.81106
2866882	NC_000962.3	G	A	12133.8	1460	59.64	-1.504	1.938	1040	418	1458	R	MT-2151	952.498	1.53281
2866882	NC_000962.3	G	A	7363.77	826	59.6	-2.703	0.565	570	255	825	R	MT-2800	672.144	1.2289
2866882	NC_000962.3	G	A	9563.77	1137	59.72	-1.785	0.579	807	327	1134	R	MT-2720	667.441	1.70352
2866882	NC_000962.3	G	A	8832.77	1086	59.76	-0.399	0	780	304	1084	R	MT-467	829.937	1.30853
2866882	NC_000962.3	G	A	7775.77	1061	59.83	-1.319	0	775	284	1059	R	MT-2474	619.076	1.71384
2866882	NC_000962.3	G	A	7742.77	933	59.71	-2.59	0	666	265	931	R	MT-5531	691.535	1.34917
2866882	NC_000962.3	G	A	9781.77	1098	59.5	-1.42	1.204	764	333	1097	R	MT-3683	804.958	1.36405
2866882	NC_000962.3	G	A	5135.77	805	59.6	-0.429	0	608	194	802	R	MT-3173	585.845	1.37408
2866882	NC_000962.3	G	A	9957.77	1193	59.48	-0.798	0.576	840	351	1191	R	MT-1466	761.306	1.56704
2866882	NC_000962.3	G	A	9616.77	1044	59.68	-1.143	0.567	714	329	1043	R	MT-567	777.127	1.34341
2866882	NC_000962.3	G	A	6709.77	795	59.53	-0.632	2.722	553	238	791	R	MT-6226	594.349	1.3376
2866882	NC_000962.3	G	A	9748.77	1184	59.6	0.244	0.58	839	344	1183	R	MT-0712	929.442	1.27388
2866882	NC_000962.3	G	A	9588.77	1247	59.66	-1.508	0	907	338	1245	R	MT-5543	723.238	1.72419
2866882	NC_000962.3	G	A	9029.77	994	59.8	-1.016	1.901	684	310	994	R	MT-2465	562.872	1.76594
2866882	NC_000962.3	G	A	8648.77	994	59.68	-0.77	0	694	300	994	R	MT-5488	745.909	1.3326
2866882	NC_000962.3	G	A	7076.77	913	59.71	-2.704	1.256	662	250	912	R	MT-3787	609.73	1.49738
2866882	NC_000962.3	G	A	5873.77	783	59.77	0.297	5.899	570	212	782	R	MT-6218	589.217	1.32888
2866882	NC_000962.3	G	A	7445.77	1045	59.68	-1.147	0	768	273	1041	R	MT-2771	821.752	1.27167
2866882	NC_000962.3	G	A	8713.77	1037	59.79	-1.476	1.212	732	302	1034	R	74856	795.746	1.30318
2866882	NC_000962.3	G	A	6530.77	806	59.56	1.46	0	578	226	804	R	MT-3255	645.747	1.24817
2866882	NC_000962.3	G	A	10276.8	1209	59.7	-2.266	0	852	356	1208	R	MT-1206	707.427	1.70901
2866882	NC_000962.3	G	A	8909.77	1034	59.66	-1.324	0.574	725	308	1033	R	MT-0972	783.34	1.31999
2866882	NC_000962.3	G	A	9780.77	1187	59.76	-0.581	0	845	339	1184	R	MT-2175	708.086	1.67635
2866882	NC_000962.3	G	A	10683.8	1279	59.6	0.266	0	903	373	1276	R	MT-1212	748.265	1.70929
2866882	NC_000962.3	G	A	9630.77	1250	59.73	-0.292	2.832	908	341	1249	R	MT-1103	724.505	1.72532
2866882	NC_000962.3	G	A	9442.77	1197	59.53	-0.74	0.58	860	335	1195	R	MT-389	674.259	1.77528
2866882	NC_000962.3	G	A	8263.77	1167	59.77	0.391	0.603	868	296	1164	R	MT-2667	686.693	1.69945
2866882	NC_000962.3	G	A	9964.77	1210	59.66	-0.633	2.775	858	351	1209	R	MT-4854	791.843	1.52808
2866882	NC_000962.3	G	A	10613.8	1359	59.65	-1.404	0	983	374	1357	R	MT-4166	780.291	1.74166
2866882	NC_000962.3	G	A	9013.77	1139	59.74	-1.432	0.585	818	320	1138	R	MT-3341	795.415	1.43196
2866882	NC_000962.3	G	A	8332.77	1202	59.75	-2.314	2.924	893	303	1196	R	MT-1684	680.222	1.76707
2866882	NC_000962.3	G	A	8185.77	1087	59.71	-2.155	1.264	795	289	1084	R	MT-504	665.023	1.63453
2866882	NC_000962.3	G	A	8837.77	1052	59.65	-0.812	2.714	746	304	1050	R	MT-289	757.674	1.38846
2866882	NC_000962.3	G	A	8064.77	908	59.75	-1.3	1.909	631	274	905	R	MT-3673	674.031	1.34712
2866882	NC_000962.3	G	A	7843.77	953	59.73	-0.627	0.58	682	271	953	R	MT-1549	632.614	1.50645
2866882	NC_000962.3	G	A	5450.77	725	59.82	-0.516	0	528	196	724	R	MT-2665	424.731	1.70696
2866882	NC_000962.3	G	A	9848.77	1234	59.8	-1.155	1.236	879	350	1229	R	MT-3194	716.807	1.72152
2866882	NC_000962.3	G	A	7371.77	1056	59.73	-2.53	0.603	778	275	1053	R	MT-5383	810.086	1.30357
2866882	NC_000962.3	G	A	9843.77	1390	59.84	-1.028	2.036	1033	352	1385	R	MT-2473	793.868	1.75092
2866882	NC_000962.3	G	A	7446.77	906	59.7	0.052	1.223	643	262	905	R	78932	638.347	1.41929
2867207	NC_000962.3	C	G	10850.8	1265	59.15	-2.818	8.04	900	360	1260	S	MT-1206	707.427	1.78817
2867207	NC_000962.3	C	G	10341.8	1179	59.1	-4.058	5.566	828	349	1177	S	MT-3683	804.958	1.46467
2867207	NC_000962.3	C	G	10475.8	1236	59.28	-5.393	5.656	874	359	1233	S	MT-5543	723.238	1.70898
2867207	NC_000962.3	C	G	10498.8	1232	59.28	-4.345	6.798	875	355	1230	S	MT-3341	795.415	1.54888
2867207	NC_000962.3	C	G	11470.8	1464	59.03	-5.79	4.69	1064	399	1463	S	MT-2151	952.498	1.53701
2867207	NC_000962.3	C	G	7926.77	1036	59.25	-4.05	11.163	758	275	1033	S	MT-2706	701.488	1.47686
2867207	NC_000962.3	C	G	7744.77	1014	59.02	-5.244	11.011	740	271	1011	S	MT-504	665.023	1.52476
2867207	NC_000962.3	C	G	9987.77	1271	59.04	-3.283	3.663	913	355	1268	S	MT-2184	678.348	1.87367
2867207	NC_000962.3	C	G	7576.77	873	58.97	-1.819	2.742	614	257	871	S	MT-2800	672.144	1.29883
2867207	NC_000962.3	C	G	7414.77	894	59.14	-4.191	6.794	634	258	892	S	78932	638.347	1.40049
2867207	NC_000962.3	C	G	7387.77	1013	58.91	-3.863	3.788	750	262	1012	S	MT-2474	619.076	1.63631
2867207	NC_000962.3	C	G	10554.8	1384	59.27	-3.87	2.811	1011	371	1382	S	MT-0712	929.442	1.48907
2867207	NC_000962.3	C	G	10437.8	1256	59.26	-4.529	2.776	895	360	1255	S	MT-0080	858.628	1.4628
2867207	NC_000962.3	C	G	10986.8	1181	59.03	-3.597	6.569	808	368	1176	S	MT-1212	748.265	1.57832
2867207	NC_000962.3	C	G	9502.77	1228	59.12	-4.018	9.675	894	328	1222	S	MT-1605	704.559	1.74293
2867207	NC_000962.3	C	G	9445.77	1291	59.01	-4.459	7.146	953	332	1285	S	MT-2473	793.868	1.62621
2867207	NC_000962.3	C	G	8590.77	1172	59.31	-4.847	4.72	858	306	1164	S	MT-2769	687.439	1.70488
2867207	NC_000962.3	C	G	6296.77	887	59.35	-3.527	8.266	646	235	881	S	MT-3173	585.845	1.51405
2867207	NC_000962.3	C	G	9420.77	1125	59.1	-5.127	2.753	794	329	1123	S	MT-2771	821.752	1.36903
2867207	NC_000962.3	C	G	9608.77	1145	58.9	-3.271	6.735	804	336	1140	S	MT-3271	654.699	1.7489
2867207	NC_000962.3	C	G	11348.8	1453	58.95	-5.047	4.766	1058	393	1451	S	MT-0718	814.878	1.78309
2867207	NC_000962.3	C	G	7490.77	1124	59.29	-4.707	8.573	842	278	1120	S	MT-1684	680.222	1.6524
2867207	NC_000962.3	C	G	7655.77	921	59.1	-4.33	3.658	659	259	918	S	MT-3787	609.73	1.5105
2867207	NC_000962.3	C	G	9361.77	1158	59.08	-4.25	12.335	831	322	1153	S	MT-2667	686.693	1.68634
2867207	NC_000962.3	C	G	11783.8	1295	59.07	-2.781	5.491	894	397	1291	S	MT-4854	791.843	1.63543
2867207	NC_000962.3	C	G	10062.8	1124	58.77	-3.318	3.563	779	342	1121	S	MT-2356	630.417	1.78295
2867207	NC_000962.3	C	G	11191.8	1227	59.32	-4.944	3.557	852	375	1227	S	MT-5383	810.086	1.51465
2867207	NC_000962.3	C	G	7367.77	942	59.43	-3.765	9.691	683	253	936	S	MT-3255	645.747	1.45878
2867207	NC_000962.3	C	G	10774.8	1293	58.99	-3.586	4.58	917	371	1288	S	MT-5195	800.645	1.61495
2867207	NC_000962.3	C	G	8176.77	1080	59.11	-3.222	6.91	791	289	1080	S	MT-2720	667.441	1.61812
2867207	NC_000962.3	C	G	10283.8	1227	59.06	-2.948	6.827	880	346	1226	S	MT-5983	804.62	1.52494
2867207	NC_000962.3	C	G	11708.8	1196	59.1	-4.699	10.257	813	383	1196	S	MT-567	777.127	1.539
2867207	NC_000962.3	C	G	7686.77	1006	59.27	-4.477	9.757	736	268	1004	S	MT-5488	745.909	1.34869
2867207	NC_000962.3	C	G	9329.77	1106	59.17	-4.329	2.723	779	323	1102	S	MT-405	809.576	1.36615
2867207	NC_000962.3	C	G	7691.77	1105	59.07	-4.439	0.602	825	278	1103	S	MT-2174	619.613	1.78337
2867207	NC_000962.3	C	G	4890.77	698	59.11	-4.174	3.748	508	187	695	S	MT-2665	424.731	1.64339
2867207	NC_000962.3	C	G	8586.77	1085	58.91	-3.325	5.785	779	301	1080	S	MT-4942	684.058	1.58612
2867207	NC_000962.3	C	G	7023.77	802	58.98	-3.286	7.812	551	249	800	S	MT-6218	589.217	1.36113
2867207	NC_000962.3	C	G	10160.8	1103	58.83	-5.722	7.82	757	342	1099	S	MT-1336	596.214	1.85001
2867207	NC_000962.3	C	G	8653.77	1001	59.26	-2.896	12.188	707	293	1000	S	68995	710.925	1.40802
2867207	NC_000962.3	C	G	8719.77	1182	59.2	-2.791	2.842	868	314	1182	S	74856	795.746	1.4854
2867207	NC_000962.3	C	G	8522.77	1014	58.94	-4.186	9.334	715	294	1009	S	MT-1549	632.614	1.60287
2867207	NC_000962.3	C	G	9283.77	1198	58.93	-3.474	6.91	873	324	1197	S	MT-1103	724.505	1.65354
2867207	NC_000962.3	C	G	7695.77	997	59.23	-2.668	11.084	726	269	995	S	MT-5531	691.535	1.44172
2867207	NC_000962.3	C	G	9320.77	1202	59	-3.855	9.551	874	326	1200	S	MT-1393	744.375	1.61478
2867207	NC_000962.3	C	G	8495.77	1114	59.03	-1.35	4.742	810	300	1110	S	MT-0972	783.34	1.42212
2867207	NC_000962.3	C	G	9874.77	1271	58.99	-2.983	6.942	922	347	1269	S	MT-1466	761.306	1.6695
2867207	NC_000962.3	C	G	9327.77	1144	58.9	-2.726	5.722	821	318	1139	S	MT-1838	809.501	1.41322
2867207	NC_000962.3	C	G	9422.77	1175	59.05	-4.441	10.988	847	326	1173	S	MT-2175	708.086	1.6594
2867207	NC_000962.3	C	G	9745.77	1291	59.12	-5.476	1.268	947	341	1288	S	MT-4166	780.291	1.65451
2867207	NC_000962.3	C	G	9443.77	1125	59.18	-3.406	0.578	797	326	1123	S	MT-289	757.674	1.48481
2867207	NC_000962.3	C	G	9459.77	1199	59.11	-2.936	8.115	864	333	1197	S	MT-3194	716.807	1.6727
2867207	NC_000962.3	C	G	9566.77	1274	59.16	-4.257	5.855	932	337	1269	S	MT-2762	689.696	1.84719
2867207	NC_000962.3	C	G	7422.77	893	59.27	-3.768	4.583	634	258	892	S	MT-6429	657.841	1.35747
2867207	NC_000962.3	C	G	7186.77	948	59.08	-4.068	16.527	698	247	945	S	MT-578	721.183	1.31451
2867207	NC_000962.3	C	G	9931.77	1285	59.24	-4.602	4.754	937	345	1282	S	MT-467	829.937	1.54831
2867207	NC_000962.3	C	G	8696.77	1114	59.16	-2.903	9.516	810	302	1112	S	73787	778.122	1.43165
2867207	NC_000962.3	C	G	9394.77	1150	59.05	-5.685	3.645	824	323	1147	S	MT-389	674.259	1.70558
2867207	NC_000962.3	C	G	5882.77	949	59.18	-2.602	14.966	715	232	947	S	MT-2465	562.872	1.686
2867207	NC_000962.3	C	G	8219.77	970	59.17	-2.551	6.698	679	290	969	S	MT-3673	674.031	1.4391
2867207	NC_000962.3	C	G	7251.77	851	59.2	-3.881	2.747	601	247	848	S	MT-6226	594.349	1.43182
2867207	NC_000962.3	C	G	8886.77	1024	59.1	-3.721	9.205	724	300	1024	S	MT-6084	570.377	1.7953
2867298	NC_000962.3	C	A	8495.77	1121	56.08	2.4	0	824	296	1120	M	73787	778.122	1.44065
2867298	NC_000962.3	C	A	7299.77	901	56.15	2.96	9.516	654	246	900	M	MT-6429	657.841	1.36963
2867298	NC_000962.3	C	A	8846.77	1267	56.42	3.6	1.3	952	314	1266	M	MT-1212	748.265	1.69325
2867298	NC_000962.3	C	A	6979.77	947	56.11	2.095	0	700	246	946	M	MT-3673	674.031	1.40498
2867298	NC_000962.3	C	A	8915.77	1190	56.14	2.811	2.82	872	318	1190	M	MT-3683	804.958	1.47834
2867298	NC_000962.3	C	A	6784.77	914	56.15	1.611	1.264	677	237	914	M	MT-3787	609.73	1.49902
2867298	NC_000962.3	C	A	4943.77	913	56.81	0.034	22.598	710	203	913	M	MT-2465	562.872	1.62204
2867298	NC_000962.3	C	A	9767.77	1270	56.07	3.238	5.766	924	343	1267	M	MT-467	829.937	1.53024
2867298	NC_000962.3	C	A	6228.77	995	56.57	-0.312	6.469	763	232	995	M	MT-578	721.183	1.37968
2867298	NC_000962.3	C	A	7113.77	1142	56.54	2.128	1.336	873	269	1142	M	MT-4942	684.058	1.66945
2867298	NC_000962.3	C	A	6998.77	1034	56.35	2.538	2.104	779	255	1034	M	MT-2474	619.076	1.67023
2867298	NC_000962.3	C	A	6577.77	1034	56.42	0.411	5.099	787	246	1033	M	MT-1549	632.614	1.63449
2867298	NC_000962.3	C	A	10105.8	1375	56.24	3.19	6.982	1017	358	1375	M	MT-0712	929.442	1.47938
2867298	NC_000962.3	C	A	8474.77	1261	56.48	4.098	0.607	954	305	1259	M	MT-1103	724.505	1.7405
2867298	NC_000962.3	C	A	8864.77	1133	55.87	3.833	0.597	823	310	1133	M	MT-1838	809.501	1.39963
2867298	NC_000962.3	C	A	7311.77	917	55.76	2.403	2.778	662	255	917	M	78932	638.347	1.43652
2867298	NC_000962.3	C	A	7995.77	1275	56.52	1.856	1.326	973	302	1275	M	MT-1206	707.427	1.80231
2867298	NC_000962.3	C	A	7767.77	1203	56.57	0.541	2.941	914	285	1199	M	MT-2762	689.696	1.74425
2867298	NC_000962.3	C	A	8372.77	1099	56.16	2.963	2.004	806	292	1098	M	MT-567	777.127	1.41418
2867298	NC_000962.3	C	A	7203.77	1062	56.4	2.289	0	801	261	1062	M	MT-2356	630.417	1.6846
2867298	NC_000962.3	C	A	8018.77	977	55.74	2.552	3.725	704	273	977	M	68995	710.925	1.37427
2867298	NC_000962.3	C	A	9461.77	1159	55.81	1.035	1.236	830	329	1159	M	MT-405	809.576	1.43161
2867298	NC_000962.3	C	A	6238.77	865	56.48	2.198	5.934	645	220	865	M	MT-3173	585.845	1.4765
2867298	NC_000962.3	C	A	7996.77	1209	56.56	2.412	2.934	910	297	1207	M	MT-3341	795.415	1.51996
2867298	NC_000962.3	C	A	11230.8	1500	56.07	1.822	1.992	1096	401	1497	M	MT-2151	952.498	1.57481
2867298	NC_000962.3	C	A	6949.77	1176	56.6	0.971	5.077	900	273	1173	M	MT-2720	667.441	1.76195
2867298	NC_000962.3	C	A	6974.77	1033	56.37	1.211	2.055	774	258	1032	M	MT-1336	596.214	1.7326
2867298	NC_000962.3	C	A	9558.77	1321	56.24	3.186	8.314	977	344	1321	M	MT-4854	791.843	1.66826
2867298	NC_000962.3	C	A	7629.77	1092	56.22	2.564	4.952	816	276	1092	M	74856	795.746	1.3723
2867298	NC_000962.3	C	A	7530.77	1015	56.15	3.872	2.81	743	271	1014	M	MT-5531	691.535	1.46775
2867298	NC_000962.3	C	A	7019.77	1086	56.47	2.967	2.096	829	257	1086	M	MT-2706	701.488	1.54814
2867298	NC_000962.3	C	A	8422.77	1254	56.45	2.299	2.06	946	308	1254	M	MT-5195	800.645	1.56624
2867298	NC_000962.3	C	A	7074.77	1046	56.37	2.401	1.297	786	259	1045	M	MT-2174	619.613	1.68815
2867298	NC_000962.3	C	A	7453.77	1078	56.38	-0.498	2.05	807	270	1077	M	MT-6084	570.377	1.88998
2867298	NC_000962.3	C	A	7584.77	1259	56.75	0.6	1.329	970	288	1258	M	MT-5543	723.238	1.74078
2867298	NC_000962.3	C	A	8631.77	1310	56.53	2.638	0.61	988	320	1308	M	MT-2184	678.348	1.93116
2867298	NC_000962.3	C	A	6421.77	800	55.86	2.292	0.588	578	220	798	M	MT-6218	589.217	1.35773
2867298	NC_000962.3	C	A	9488.77	1352	56.37	2.276	0	1009	343	1352	M	MT-4166	780.291	1.73269
2867298	NC_000962.3	C	A	9010.77	1139	55.97	1.822	0	823	316	1139	M	MT-389	674.259	1.68926
2867298	NC_000962.3	C	A	7145.77	1236	56.81	1.142	4.135	964	269	1233	M	MT-2175	708.086	1.74555
2867298	NC_000962.3	C	A	8112.77	1221	56.51	3.883	3.939	928	293	1221	M	MT-5983	804.62	1.51749
2867298	NC_000962.3	C	A	8676.77	1206	56.22	1.773	4.809	898	308	1206	M	MT-2771	821.752	1.4676
2867298	NC_000962.3	C	A	9799.77	1282	56.16	1.942	5.749	937	344	1281	M	MT-0080	858.628	1.49308
2867298	NC_000962.3	C	A	7823.77	991	55.9	2.803	0.593	719	271	990	M	MT-5488	745.909	1.32858
2867298	NC_000962.3	C	A	6405.77	854	56.08	4.273	9.514	627	227	854	M	MT-6226	594.349	1.43687
2867298	NC_000962.3	C	A	8504.77	1214	56.32	2.489	7.086	906	307	1213	M	MT-5383	810.086	1.49861
2867298	NC_000962.3	C	A	8205.77	1267	56.42	1.344	0	956	309	1265	M	MT-1466	761.306	1.66425
2867298	NC_000962.3	C	A	6739.77	1204	56.57	2.032	6.491	941	262	1203	M	MT-2667	686.693	1.75333
2867298	NC_000962.3	C	A	4810.77	764	56.74	0.875	0	583	180	763	M	MT-2665	424.731	1.79879
2867298	NC_000962.3	C	A	6212.77	900	56.32	3.618	2.062	675	225	900	M	MT-2800	672.144	1.339
2867298	NC_000962.3	C	A	7861.77	1171	56.42	0.589	0	879	291	1170	M	MT-3271	654.699	1.78861
2867298	NC_000962.3	C	A	6483.77	933	56.52	2.426	5.922	698	233	931	M	MT-3255	645.747	1.44484
2867298	NC_000962.3	C	A	7430.77	1296	56.77	1.147	3.974	1008	288	1296	M	MT-1605	704.559	1.83945
2867298	NC_000962.3	C	A	9589.77	1408	56.24	1.271	5.995	1052	355	1407	M	MT-0718	814.878	1.72787
2867298	NC_000962.3	C	A	7857.77	1226	56.62	2.379	0.618	937	289	1226	M	MT-3194	716.807	1.71036
2867298	NC_000962.3	C	A	8350.77	1135	56.06	2.872	0.605	835	299	1134	M	MT-0972	783.34	1.44892
2867298	NC_000962.3	C	A	9489.77	1074	55.68	3.985	2.702	756	317	1073	M	MT-289	757.674	1.4175
2867298	NC_000962.3	C	A	8073.77	1365	56.75	0.32	6.253	1052	313	1365	M	MT-2473	793.868	1.71943
2867298	NC_000962.3	C	A	7061.77	1191	56.71	0.088	6.17	920	270	1190	M	MT-2769	687.439	1.73252
2867298	NC_000962.3	C	A	7457.77	1143	56.55	0.495	6.016	866	277	1143	M	MT-504	665.023	1.71874
2867298	NC_000962.3	C	A	8127.77	1146	56.25	2.672	0.601	854	290	1144	M	MT-1393	744.375	1.53955
2867298	NC_000962.3	C	A	6551.77	1163	56.83	-0.556	6.479	906	257	1163	M	MT-1684	680.222	1.70974
2867347	NC_000962.3	A	G	11670.8	1500	56.51	4.82	0	1083	416	1499	R	MT-0712	929.442	1.61387
2867347	NC_000962.3	A	G	12559.8	1500	56.26	7.42	7.939	1053	444	1497	R	MT-2151	952.498	1.57481
2867347	NC_000962.3	A	G	9236.77	1022	55.78	5.127	4.456	700	320	1020	R	78932	638.347	1.60101
2867347	NC_000962.3	A	G	7790.77	1020	56.48	2.272	0.591	746	272	1018	R	MT-2800	672.144	1.51753
2867347	NC_000962.3	A	G	7803.77	920	55.77	5.698	2.754	640	280	920	R	MT-6218	589.217	1.56139
2867347	NC_000962.3	A	G	10024.8	1241	56.2	2.782	4.635	885	354	1239	R	MT-1838	809.501	1.53304
2867347	NC_000962.3	A	G	8892.77	1067	56.52	4.646	4.602	763	304	1067	R	MT-6429	657.841	1.62197
2867347	NC_000962.3	A	G	8300.77	1192	56.74	3.401	0	890	302	1192	R	MT-2706	701.488	1.69925
2867347	NC_000962.3	A	G	8508.77	1035	56.09	4.42	3.614	732	302	1034	R	MT-3787	609.73	1.69747
2867347	NC_000962.3	A	G	9474.77	1155	56.11	7.674	9.267	810	342	1152	R	MT-2474	619.076	1.86568
2867347	NC_000962.3	A	G	10967.8	1043	55.33	4.684	12.836	682	360	1042	R	68995	710.925	1.4671
2867347	NC_000962.3	A	G	10135.8	1205	55.95	4.279	6.784	851	353	1204	R	73787	778.122	1.5486
2867347	NC_000962.3	A	G	11444.8	1354	56.03	7.518	0.576	941	408	1349	R	MT-389	674.259	2.00813
2867347	NC_000962.3	A	G	10295.8	1347	56.32	5.261	1.254	967	378	1345	R	MT-1103	724.505	1.8592
2867347	NC_000962.3	A	G	6229.77	821	56.3	6.225	1.977	587	232	819	R	MT-2665	424.731	1.93299
2867347	NC_000962.3	A	G	7080.77	959	56.65	4.425	0	698	260	958	R	MT-3173	585.845	1.63695
2867347	NC_000962.3	A	G	11246.8	1313	56.23	5.403	0	922	389	1311	R	MT-3683	804.958	1.63114
2867347	NC_000962.3	A	G	10661.8	1252	56.32	5.115	0.568	881	370	1251	R	MT-3341	795.415	1.57402
2867347	NC_000962.3	A	G	8818.77	1137	56.26	6.267	26.6	819	317	1136	R	MT-578	721.183	1.57658
2867347	NC_000962.3	A	G	7256.77	939	56.39	2.622	1.977	669	269	938	R	MT-6226	594.349	1.57988
2867347	NC_000962.3	A	G	9038.77	1220	56.34	6.08	6.976	884	335	1219	R	MT-1336	596.214	2.04625
2867347	NC_000962.3	A	G	11523.8	1241	56.12	4.082	0	848	392	1240	R	MT-289	757.674	1.63791
2867347	NC_000962.3	A	G	9533.77	1130	55.92	4.188	5.596	797	333	1130	R	MT-3673	674.031	1.67648
2867347	NC_000962.3	A	G	9996.77	1277	56.6	7.111	1.243	921	356	1277	R	74856	795.746	1.60478
2867347	NC_000962.3	A	G	10582.8	1374	56.75	6.922	0.585	997	376	1373	R	MT-5983	804.62	1.70764
2867347	NC_000962.3	A	G	11285.8	1426	56.44	7.025	0	1025	400	1425	R	MT-5195	800.645	1.78106
2867347	NC_000962.3	A	G	11013.8	1425	56.39	6.288	3.708	1023	401	1424	R	MT-2184	678.348	2.10069
2867347	NC_000962.3	A	G	9513.77	1369	56.52	7.151	8.403	1007	360	1367	R	MT-2175	708.086	1.93338
2867347	NC_000962.3	A	G	9508.77	1327	56.43	7.186	2.025	965	360	1325	R	MT-3271	654.699	2.02689
2867347	NC_000962.3	A	G	6837.77	1065	56.69	7.167	18.453	780	283	1063	R	MT-2465	562.872	1.89208
2867347	NC_000962.3	A	G	12110.8	1465	56.28	4.365	0	1034	429	1463	R	MT-467	829.937	1.76519
2867347	NC_000962.3	A	G	9641.77	1239	56.41	7.497	1.997	893	343	1236	R	MT-2356	630.417	1.96537
2867347	NC_000962.3	A	G	11463.8	1499	56.4	7.686	11.082	1078	420	1498	R	MT-0718	814.878	1.83954
2867347	NC_000962.3	A	G	10237.8	1374	56.36	8.475	7.041	991	379	1370	R	MT-2762	689.696	1.99218
2867347	NC_000962.3	A	G	11741.8	1344	56.12	6.278	1.202	940	403	1343	R	MT-405	809.576	1.66013
2867347	NC_000962.3	A	G	10946.8	1413	56.55	9.125	4.736	1021	389	1410	R	MT-5543	723.238	1.95371
2867347	NC_000962.3	A	G	11250.8	1500	56.32	8.04	12.519	1079	421	1500	R	MT-2473	793.868	1.88948
2867347	NC_000962.3	A	G	10553.8	1310	56.38	6.673	0.581	936	374	1310	R	MT-2771	821.752	1.59415
2867347	NC_000962.3	A	G	9838.77	1341	56.48	6.492	5.872	982	355	1337	R	MT-4942	684.058	1.96036
2867347	NC_000962.3	A	G	9188.77	1208	56.39	7.806	10.905	869	339	1208	R	MT-1549	632.614	1.90954
2867347	NC_000962.3	A	G	12320.8	1500	56.24	7.712	1.934	1056	442	1498	R	MT-4166	780.291	1.92236
2867347	NC_000962.3	A	G	9589.77	1315	56.36	7.092	14.478	957	355	1312	R	MT-2720	667.441	1.97021
2867347	NC_000962.3	A	G	9664.77	1335	56.29	7.68	14.677	969	362	1331	R	MT-2667	686.693	1.9441
2867347	NC_000962.3	A	G	10600.8	1410	56.42	6.906	1.258	1028	381	1409	R	MT-1466	761.306	1.85208
2867347	NC_000962.3	A	G	10313.8	1496	56.53	6.682	7.155	1104	390	1494	R	MT-1605	704.559	2.12331
2867347	NC_000962.3	A	G	11702.8	1427	56.3	5.801	0.586	1010	416	1426	R	MT-1212	748.265	1.90708
2867347	NC_000962.3	A	G	11310.8	1391	56.5	5.677	2.753	992	398	1390	R	MT-5383	810.086	1.7171
2867347	NC_000962.3	A	G	11358.8	1218	55.86	4.227	3.519	835	383	1218	R	MT-0972	783.34	1.55488
2867347	NC_000962.3	A	G	10370.8	1322	56.26	6.573	5.721	942	379	1321	R	MT-1393	744.375	1.77599
2867347	NC_000962.3	A	G	8152.77	1090	56.83	5.64	0.586	794	296	1090	R	MT-3255	645.747	1.68797
2867347	NC_000962.3	A	G	12297.8	1383	56.24	6.383	1.204	963	418	1381	R	MT-0080	858.628	1.61071
2867347	NC_000962.3	A	G	9259.77	1159	56.29	4.324	0	824	335	1159	R	MT-5531	691.535	1.67598
2867347	NC_000962.3	A	G	8420.77	1279	56.71	7.762	11.596	953	325	1278	R	MT-1684	680.222	1.88027
2867347	NC_000962.3	A	G	9758.77	1342	56.39	7.375	7.131	974	366	1340	R	MT-2769	687.439	1.95217
2867347	NC_000962.3	A	G	10092.8	1372	56.51	6.354	4.751	1000	370	1370	R	MT-3194	716.807	1.91404
2867347	NC_000962.3	A	G	10161.8	1246	56.4	9.162	6.734	881	361	1242	R	MT-6084	570.377	2.18452
2867347	NC_000962.3	A	G	11188.8	1323	56.28	5.209	0	936	386	1322	R	MT-567	777.127	1.70242
2867347	NC_000962.3	A	G	12012.8	1488	56.42	6.434	4.592	1062	425	1487	R	MT-4854	791.843	1.87916
2867347	NC_000962.3	A	G	10197.8	1249	56.23	5.803	6.89	889	359	1248	R	MT-2174	619.613	2.01577
2867347	NC_000962.3	A	G	9732.77	1065	55.91	3.92	10.397	736	327	1063	R	MT-5488	745.909	1.42779
2867347	NC_000962.3	A	G	9920.77	1237	56.29	7.629	12.325	871	363	1234	R	MT-504	665.023	1.86009
2867347	NC_000962.3	A	G	10590.8	1386	56.19	5.797	3.688	987	398	1385	R	MT-1206	707.427	1.95921
336535	NC_000962.3	T	G	6414.77	855	59.61	9.573	2.013	623	231	854	K	MT-1684	680.222	1.25694
336535	NC_000962.3	T	G	9723.77	1121	59.31	10.224	0	795	326	1121	K	MT-3341	795.415	1.40933
336535	NC_000962.3	T	G	8218.77	1032	59.25	8.967	3.715	747	284	1031	K	MT-5383	810.086	1.27394
336535	NC_000962.3	T	G	8035.77	980	59.35	8.889	0	705	275	980	K	MT-5531	691.535	1.41714
336535	NC_000962.3	T	G	8967.77	990	59.39	8.828	1.94	697	293	990	K	68995	710.925	1.39255
336535	NC_000962.3	T	G	4728.77	762	59.69	7.267	3.036	587	175	762	K	MT-2465	562.872	1.35377
336535	NC_000962.3	T	G	6676.77	853	59.34	8.968	0	625	228	853	K	MT-2184	678.348	1.25747
336535	NC_000962.3	T	G	7356.77	944	59.44	9.459	0	685	258	943	K	MT-4166	780.291	1.20981
336535	NC_000962.3	T	G	5200.77	729	59.5	8.151	0	539	190	729	K	MT-1549	632.614	1.15236
336535	NC_000962.3	T	G	7498.77	1063	59.59	8.979	0	797	266	1063	K	MT-578	721.183	1.47397
336535	NC_000962.3	T	G	7511.77	924	59.42	9.337	8.178	667	255	922	K	MT-1212	748.265	1.23486
336535	NC_000962.3	T	G	6539.77	926	59.48	8.424	0.604	689	237	926	K	MT-1206	707.427	1.30897
336535	NC_000962.3	T	G	8182.77	1024	59.43	9.345	3.706	747	276	1023	K	MT-3673	674.031	1.51922
336535	NC_000962.3	T	G	7878.77	939	59.32	8.883	2.721	669	270	939	K	MT-1103	724.505	1.29606
336535	NC_000962.3	T	G	7032.77	838	59.47	6.884	0.581	603	234	837	K	MT-504	665.023	1.26011
336535	NC_000962.3	T	G	9893.77	1255	59.35	12.264	0.588	913	341	1254	K	MT-2151	952.498	1.31759
336535	NC_000962.3	T	G	10865.8	1330	59.16	10.963	0.585	954	375	1329	K	MT-0712	929.442	1.43097
336535	NC_000962.3	T	G	7831.77	1037	59.65	8.73	1.992	760	276	1036	K	MT-2473	793.868	1.30626
336535	NC_000962.3	T	G	6224.77	887	59.48	8.546	2.053	665	222	887	K	MT-4942	684.058	1.29667
336535	NC_000962.3	T	G	9044.77	1231	59.45	11	2.867	907	323	1230	K	MT-0080	858.628	1.43368
336535	NC_000962.3	T	G	8654.77	1026	59.18	9.227	1.947	733	293	1026	K	MT-5488	745.909	1.3755
336535	NC_000962.3	T	G	4798.77	802	59.43	7.014	4.058	622	179	801	K	MT-389	674.259	1.18945
336535	NC_000962.3	T	G	7084.77	893	59.05	8.137	0	644	248	892	K	MT-6226	594.349	1.50248
336535	NC_000962.3	T	G	8922.77	1031	59.28	9.532	0.574	731	300	1031	K	MT-5195	800.645	1.28771
336535	NC_000962.3	T	G	6787.77	1045	59.19	8.728	3.915	798	247	1045	K	MT-1466	761.306	1.37264
336535	NC_000962.3	T	G	6763.77	1024	59.42	10.743	2.938	781	243	1024	K	MT-1393	744.375	1.37565
336535	NC_000962.3	T	G	7509.77	1023	59.28	9.287	0.597	756	266	1022	K	MT-4854	791.843	1.29192
336535	NC_000962.3	T	G	9366.77	1161	59.32	10.183	0.585	839	321	1160	K	MT-405	809.576	1.43408
336535	NC_000962.3	T	G	5876.77	802	59.51	8.407	0	594	207	801	K	MT-2474	619.076	1.29548
336535	NC_000962.3	T	G	5187.77	738	59.52	9.054	1.291	550	188	738	K	MT-2356	630.417	1.17065
336535	NC_000962.3	T	G	7353.77	896	59.22	8.464	6.965	643	253	896	K	MT-2762	689.696	1.29912
336535	NC_000962.3	T	G	8808.77	1060	59.43	9.404	1.234	760	300	1060	K	73787	778.122	1.36225
336535	NC_000962.3	T	G	9838.77	1119	59.08	7.843	0	784	334	1118	K	MT-467	829.937	1.3483
336535	NC_000962.3	T	G	6780.77	897	59.43	8.383	4.71	655	241	896	K	MT-6218	589.217	1.52236
336535	NC_000962.3	T	G	7082.77	881	59.21	6.692	4.674	632	249	881	K	MT-6429	657.841	1.33923
336535	NC_000962.3	T	G	7944.77	1039	59.36	8.168	0	763	276	1039	K	MT-0972	783.34	1.32637
336535	NC_000962.3	T	G	6564.77	942	59.23	8.229	0	710	232	942	K	MT-2800	672.144	1.40149
336535	NC_000962.3	T	G	6483.77	854	59.41	9.881	2.82	625	227	852	K	MT-3194	716.807	1.19139
336535	NC_000962.3	T	G	5479.77	745	59.62	8.57	2.019	552	193	745	K	MT-1336	596.214	1.24955
336535	NC_000962.3	T	G	6959.77	864	59.61	8.397	0.598	629	235	864	K	MT-2769	687.439	1.25684
336535	NC_000962.3	T	G	6684.77	936	59.34	8.787	1.294	700	236	936	K	MT-0718	814.878	1.14864
336535	NC_000962.3	T	G	10997.8	1244	59.29	10.273	0.573	876	367	1243	K	MT-2771	821.752	1.51384
336535	NC_000962.3	T	G	5692.77	843	59.2	7.013	0.604	625	217	842	K	MT-3173	585.845	1.43895
336535	NC_000962.3	T	G	6023.77	864	59.44	9.969	7.225	647	217	864	K	MT-5543	723.238	1.19463
336535	NC_000962.3	T	G	5502.77	740	59.44	7.375	3.768	543	197	740	K	MT-3271	654.699	1.13029
336535	NC_000962.3	T	G	5214.77	871	59.77	7.663	7.727	671	200	871	K	MT-2667	686.693	1.2684
336535	NC_000962.3	T	G	8576.77	1093	59.17	9.873	0.588	797	296	1093	K	MT-5983	804.62	1.35841
336535	NC_000962.3	T	G	8338.77	964	58.88	9.766	0.576	675	288	963	K	MT-3255	645.747	1.49284
336535	NC_000962.3	T	G	9373.77	1109	59.34	9.963	0	793	316	1109	K	74856	795.746	1.39366
336535	NC_000962.3	T	G	5207.77	786	59.58	7.435	1.321	600	186	786	K	MT-2174	619.613	1.26853
336535	NC_000962.3	T	G	6655.77	865	59.39	7.021	2.018	632	231	863	K	78932	638.347	1.35506
336535	NC_000962.3	T	G	9917.77	1139	59.09	8.655	0	805	334	1139	K	MT-1838	809.501	1.40704
336535	NC_000962.3	T	G	9175.77	1061	59.18	11.171	0	753	308	1061	K	MT-289	757.674	1.40034
336535	NC_000962.3	T	G	3375.77	497	59.34	7.344	2.874	371	126	497	K	MT-2665	424.731	1.17015
336535	NC_000962.3	T	G	6577.77	850	59.49	7.769	0.597	623	226	849	K	MT-2720	667.441	1.27352
336535	NC_000962.3	T	G	6616.77	879	59.35	7.832	2.018	646	233	879	K	MT-3787	609.73	1.44162
336535	NC_000962.3	T	G	6452.77	901	59.5	8.438	0	673	226	899	K	MT-1605	704.559	1.27881
336535	NC_000962.3	T	G	8738.77	1049	59.16	9.625	3.66	752	297	1049	K	MT-2706	701.488	1.49539
336535	NC_000962.3	T	G	8954.77	1123	59.38	10.278	1.233	807	315	1122	K	MT-567	777.127	1.44507
336535	NC_000962.3	T	G	7445.77	974	59.41	8.936	2.851	714	259	973	K	MT-2175	708.086	1.37554
336535	NC_000962.3	T	G	9112.77	1141	59.19	8.556	1.244	828	313	1141	K	MT-3683	804.958	1.41747
336535	NC_000962.3	T	G	4773.77	636	59.49	9.576	0	470	166	636	K	MT-6084	570.377	1.11505
336537	NC_000962.3	T	G	8660.77	995	59.4	9.982	3.593	703	291	994	K	68995	710.925	1.39959
336537	NC_000962.3	T	G	6550.77	939	59.23	9.103	0	707	232	939	K	MT-2800	672.144	1.39702
336537	NC_000962.3	T	G	3554.77	489	59.32	7.637	3.752	362	127	489	K	MT-2665	424.731	1.15132
336537	NC_000962.3	T	G	6852.77	903	59.43	9.77	3.777	662	241	903	K	MT-6218	589.217	1.53254
336537	NC_000962.3	T	G	7540.77	921	59.42	10.382	8.24	664	257	921	K	MT-1212	748.265	1.23085
336537	NC_000962.3	T	G	8570.77	1040	59.15	10.457	3.66	741	298	1039	K	MT-2706	701.488	1.48256
336537	NC_000962.3	T	G	4641.77	796	59.43	7.929	6.238	615	181	796	K	MT-389	674.259	1.18056
336537	NC_000962.3	T	G	9209.77	1154	59.31	11.209	0.588	836	318	1154	K	MT-405	809.576	1.42544
336537	NC_000962.3	T	G	10766.8	1230	59.28	11.233	0.576	864	366	1230	K	MT-2771	821.752	1.4968
336537	NC_000962.3	T	G	9848.77	1245	59.34	13.508	1.247	902	343	1245	K	MT-2151	952.498	1.30709
336537	NC_000962.3	T	G	6786.77	1039	59.18	9.884	3.915	793	246	1039	K	MT-1466	761.306	1.36476
336537	NC_000962.3	T	G	7730.77	1039	59.36	9.26	0	765	274	1039	K	MT-0972	783.34	1.32637
336537	NC_000962.3	T	G	6431.77	851	59.34	9.823	1.257	622	229	851	K	MT-2184	678.348	1.25452
336537	NC_000962.3	T	G	7266.77	940	59.44	10.793	0.582	680	258	938	K	MT-4166	780.291	1.20468
336537	NC_000962.3	T	G	8909.77	1026	59.27	10.601	0	725	301	1026	K	MT-5195	800.645	1.28147
336537	NC_000962.3	T	G	7738.77	979	59.35	10.044	0	704	274	978	K	MT-5531	691.535	1.41569
336537	NC_000962.3	T	G	6153.77	857	59.43	11.017	5.902	638	218	856	K	MT-5543	723.238	1.18495
336537	NC_000962.3	T	G	9265.77	1100	59.34	10.905	0	784	316	1100	K	74856	795.746	1.38235
336537	NC_000962.3	T	G	7698.77	974	59.41	10.184	2.811	713	261	974	K	MT-2175	708.086	1.37554
336537	NC_000962.3	T	G	8876.77	1114	59.37	11.462	0.585	802	312	1114	K	MT-567	777.127	1.43349
336537	NC_000962.3	T	G	6853.77	859	59.61	9.574	0.588	621	238	859	K	MT-2769	687.439	1.24957
336537	NC_000962.3	T	G	10749.8	1331	59.16	12.444	1.237	957	374	1331	K	MT-0712	929.442	1.43204
336537	NC_000962.3	T	G	7623.77	879	59.2	9.303	8.04	622	257	879	K	MT-2762	689.696	1.27447
336537	NC_000962.3	T	G	7598.77	1052	59.59	9.84	0	785	267	1052	K	MT-578	721.183	1.45871
336537	NC_000962.3	T	G	5314.77	729	59.51	9.812	0.604	539	189	728	K	MT-2356	630.417	1.15638
336537	NC_000962.3	T	G	6720.77	934	59.33	9.804	2.049	696	238	934	K	MT-0718	814.878	1.14618
336537	NC_000962.3	T	G	6550.77	865	59.39	8.192	2.01	633	232	865	K	78932	638.347	1.35506
336537	NC_000962.3	T	G	5243.77	725	59.5	9.177	0	537	188	725	K	MT-1549	632.614	1.14604
336537	NC_000962.3	T	G	7971.77	1030	59.25	10.151	3.715	748	281	1029	K	MT-5383	810.086	1.27147
336537	NC_000962.3	T	G	5535.77	737	59.44	8.207	4.817	541	196	737	K	MT-3271	654.699	1.12571
336537	NC_000962.3	T	G	9512.77	1127	59.09	9.508	0	794	333	1127	K	MT-467	829.937	1.35793
336537	NC_000962.3	T	G	7572.77	1019	59.27	10.422	1.271	752	266	1018	K	MT-4854	791.843	1.28687
336537	NC_000962.3	T	G	8677.77	1026	59.18	10.404	1.964	732	293	1025	K	MT-5488	745.909	1.3755
336537	NC_000962.3	T	G	5040.77	790	59.58	8.464	2.111	602	187	789	K	MT-2174	619.613	1.27499
336537	NC_000962.3	T	G	6779.77	1013	59.42	11.855	2.1	769	242	1011	K	MT-1393	744.375	1.36087
336537	NC_000962.3	T	G	6394.77	850	59.6	10.233	2.792	616	233	849	K	MT-1684	680.222	1.24959
336537	NC_000962.3	T	G	8234.77	1095	59.17	11.008	0.589	805	289	1094	K	MT-5983	804.62	1.36089
336537	NC_000962.3	T	G	7292.77	878	59.03	8.937	0.583	631	247	878	K	MT-6226	594.349	1.47725
336537	NC_000962.3	T	G	6406.77	893	59.49	9.501	1.284	668	225	893	K	MT-1605	704.559	1.26746
336537	NC_000962.3	T	G	9606.77	1132	59.09	9.466	0.569	800	330	1130	K	MT-1838	809.501	1.39839
336537	NC_000962.3	T	G	7151.77	832	59.47	7.504	1.959	595	237	832	K	MT-504	665.023	1.25108
336537	NC_000962.3	T	G	6694.77	917	59.48	9.307	0.604	681	236	917	K	MT-1206	707.427	1.29625
336537	NC_000962.3	T	G	9132.77	1127	59.18	9.676	1.25	813	314	1127	K	MT-3683	804.958	1.40007
336537	NC_000962.3	T	G	9734.77	1114	59.31	11.204	0	787	326	1113	K	MT-3341	795.415	1.40053
336537	NC_000962.3	T	G	8033.77	1021	59.43	10.332	2.803	744	276	1020	K	MT-3673	674.031	1.51477
336537	NC_000962.3	T	G	7950.77	931	59.32	9.937	2.755	663	268	931	K	MT-1103	724.505	1.28502
336537	NC_000962.3	T	G	4786.77	759	59.69	8.025	3.036	581	177	758	K	MT-2465	562.872	1.34844
336537	NC_000962.3	T	G	8305.77	964	58.88	10.978	0.576	674	290	964	K	MT-3255	645.747	1.49284
336537	NC_000962.3	T	G	8875.77	1045	59.42	10.471	1.238	744	301	1045	K	73787	778.122	1.34298
336537	NC_000962.3	T	G	6471.77	849	59.4	10.597	2.004	620	229	849	K	MT-3194	716.807	1.18442
336537	NC_000962.3	T	G	9233.77	1217	59.45	11.991	2.014	893	324	1217	K	MT-0080	858.628	1.41738
336537	NC_000962.3	T	G	7056.77	873	59.2	7.768	4.58	624	249	873	K	MT-6429	657.841	1.32707
336537	NC_000962.3	T	G	7852.77	1020	59.64	9.215	1.977	742	278	1020	K	MT-2473	793.868	1.28485
336537	NC_000962.3	T	G	6677.77	835	59.49	8.681	1.249	605	229	834	K	MT-2720	667.441	1.25105
336537	NC_000962.3	T	G	5473.77	869	59.77	8.739	7.549	666	203	869	K	MT-2667	686.693	1.26549
336537	NC_000962.3	T	G	5546.77	800	59.5	9.627	0	591	208	799	K	MT-2474	619.076	1.29225
336537	NC_000962.3	T	G	6591.77	875	59.35	9.166	2.874	645	230	875	K	MT-3787	609.73	1.43506
336537	NC_000962.3	T	G	5782.77	845	59.21	7.993	0.598	630	215	845	K	MT-3173	585.845	1.44236
336537	NC_000962.3	T	G	4763.77	628	59.49	10.1	0	459	169	628	K	MT-6084	570.377	1.10103
336537	NC_000962.3	T	G	8947.77	1057	59.18	12.291	0	750	306	1056	K	MT-289	757.674	1.39506
336537	NC_000962.3	T	G	5682.77	735	59.61	9.111	2.04	542	192	734	K	MT-1336	596.214	1.23278
336537	NC_000962.3	T	G	6518.77	882	59.48	9.514	2.868	656	225	881	K	MT-4942	684.058	1.28936
336540	NC_000962.3	G	T	9470.77	1150	59.1	11.233	0	815	334	1149	K	MT-1838	809.501	1.42063
336540	NC_000962.3	G	T	9723.77	1234	59.34	14.76	0.583	889	345	1234	K	MT-2151	952.498	1.29554
336540	NC_000962.3	G	T	5130.77	857	59.77	9.297	6.287	651	205	856	K	MT-2667	686.693	1.24801
336540	NC_000962.3	G	T	4704.77	755	59.69	9.218	2.125	578	177	755	K	MT-2465	562.872	1.34134
336540	NC_000962.3	G	T	3565.77	477	59.31	8.331	2.812	347	129	476	K	MT-2665	424.731	1.12306
336540	NC_000962.3	G	T	7857.77	1034	59.36	10.226	0	760	274	1034	K	MT-0972	783.34	1.31999
336540	NC_000962.3	G	T	9038.77	1219	59.45	13.259	3.764	895	324	1219	K	MT-0080	858.628	1.41971
336540	NC_000962.3	G	T	8992.77	1109	59.37	12.317	1.222	791	315	1106	K	MT-567	777.127	1.42705
336540	NC_000962.3	G	T	7825.77	979	59.35	11.231	0	703	275	978	K	MT-5531	691.535	1.41569
336540	NC_000962.3	G	T	6551.77	1036	59.18	11.201	3.961	788	246	1034	K	MT-1466	761.306	1.36082
336540	NC_000962.3	G	T	7484.77	971	59.41	11.587	2.811	708	262	970	K	MT-2175	708.086	1.3713
336540	NC_000962.3	G	T	7887.77	1007	59.42	11.596	2.794	732	275	1007	K	MT-3673	674.031	1.494
336540	NC_000962.3	G	T	6539.77	942	59.34	11.208	1.3	703	237	940	K	MT-0718	814.878	1.156
336540	NC_000962.3	G	T	7128.77	942	59.44	12.348	0.582	683	259	942	K	MT-4166	780.291	1.20724
[truncated: 606 more rows]
